# Supplementary material for: Discovery and Optimization of a Synthetic Class of Nectin-4-Targeted CD137 Agonists for Immuno-oncology
Source: PubMed Central journal article supplement — J Med Chem. 2022 Jul 12;65(14):9858–72. doi: 10.1021/acs.jmedchem.2c00505 (PMC9340768; doi:10.1021/acs.jmedchem.2c00505), 2022-07-12
Supplement: jm2c00505_si_001.pdf [file jm2c00505_si_001.pdf]

# Supporting Information

## Discovery and optimization of a synthetic class of Nectin-4-targeted CD137 agonists for immuno-oncology

*Punit Upadhyaya†, Julia Kristensson‡, Johanna Lahdenranta†, Elizabeth Repash†, Jun Ma†, Jessica Kublin†, Gemma E. Mudd‡, Lia Luus†, Phil Jeffrey‡, Kristen Hurov†, Kevin McDonnell†, Nicholas Keen†\**

† Bicycle Therapeutics, 4 Hartwell Place, Lexington, MA 02421 USA.

‡ Bicycle Therapeutics, B900 Building, Babraham Research Campus, Cambridge, CB22 3AT, UK.

\*Corresponding author: [Nicholas.keen@bicycletx.com](mailto:Nicholas.keen@bicycletx.com)

### **This PDF file includes:**

- Supplementary Text
- Fig S1
- Tables S1 to S8
- HPLC traces
- Structure of *Bicycle* TICAs
- References

## Supplementary Text

### Synthesis of Bicyclic peptides

*Bicycle* peptides were synthesized as previously described (36). Briefly, linear peptide was synthesized on Rink amide resin or cysteamine loaded 2-chlorotrityl resin using standard Fmoc (9-fluorenylmethyloxycarbonyl) solid phase peptide synthesis, either by manual coupling or using a Gyros Protein Technologies Symphony X automated peptide synthesizer. The peptides were cleaved from resin using TFA cleavage cocktail containing appropriate protecting group scavengers and peptides were precipitated with diethyl ether and dissolved in 50:50 acetonitrile/water. The crude peptides were then cyclized with 1,3,5-Triacryloylhexahydro-1,3,5-triazine (TATA) at ~1 mM concentration peptide with 1.3 equivalents scaffold, using ammonium bicarbonate (100 mM) as base. Once complete, the cyclisation reaction was quenched using *N*-acetyl cysteine (10 equivalents). The solutions were lyophilized and purified by RP-HPLC. Peptide fractions of sufficient purity and correct molecular weight (verified by either MALDI-TOF or HPLC and LC-MS) were pooled and lyophilized. Bicyclic peptides synthesized for this work in listed in **table S7**.

### General conjugation of 4-pentynoic acid to Bicyclic peptides

4-pentynoic acid (PYA) was incorporated into bicyclic peptide sequences to enable conjugation to a second bicyclic peptide containing a linker containing an azide group. PYA was incorporated either on solid phase by using orthogonal protecting groups on Dap, Lys or D-Lys or in solution after synthesis and purification of the bicyclic peptide. The general method for incorporation of PYA in solution is described below:

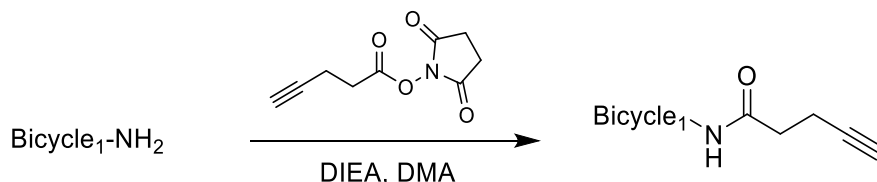

Bicycle<sub>1</sub> (1.0 eq) containing only one nucleophilic amine was dissolved in DMA (N-dimethylacetamide) and 4.0 eq of DIEA (N,N-diisopropylethylamine) was added and stirred at room temperature. 1.3 equiv. of the NHS (N-hydroxysuccinimide) ester of 4-pentynoic acid was added and stirred overnight. The reaction mixture was purified by prep-HPLC.

## Preparative HPLC conditions for purification

The *Bicycle* TICAs were purified using preparative HPLC setup was as follows:

Column: Phenomenex Gemini-NX C18 5um 110A 150 X 4.6 mm

Instrument: Agilent 1260 HPLC

The mobile phase used are described in the table below:

| Method  | Mobile Phase                                                                                               |
|---------|------------------------------------------------------------------------------------------------------------|
| TFA     | Mobile phase A: 0.1% TFA in H <sub>2</sub> O<br>Mobile Phase B: Acetonitrile                               |
| Basic   | Mobile phase A: 10 mM NH <sub>4</sub> HCO <sub>3</sub> in H <sub>2</sub> O<br>Mobile Phase B: Acetonitrile |
| Neutral | Mobile Phase A: H <sub>2</sub> O<br>Mobile Phase B: Acetonitrile                                           |

## General Synthesis of *Bicycle* TICAs:

The constituents Nectin-4 and CD137 *Bicycles* used in the synthesis of *Bicycle* TICAs are listed in **table S6**. **Table S7** reveals the sequence and cyclization scaffold of these constituent Nectin-4 and CD137 *Bicycles* along with the attachment point used for conjugation to the linker. **Table S8** has the % purity measured by analytical HPLC and observed m/z for the final molecule. The synthesis of the *Bicycle* TICAs are summarized using 4 general methods. For *Bicycle* TICAs whose synthesis is not covered by the four general methods, the specific method of synthesis is described.

### Method A: Peg5 linker

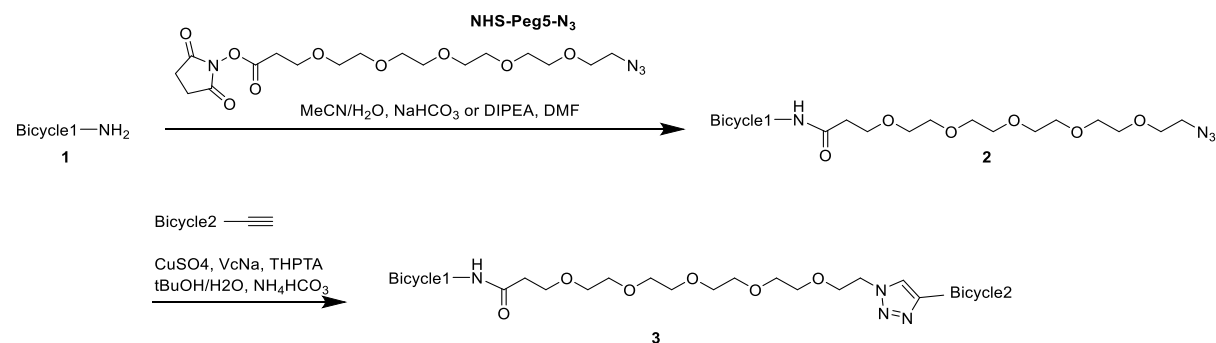

A mixture of *Bicycle* 1 (1.0 eq., Nectin-4 *Bicycle*) and NHS-PEG5-N<sub>3</sub> (1.6 eq.) is dissolved in MeCN/H<sub>2</sub>O (1:1) or DMF, and the pH of the solution adjusted to 8 by dropwise addition of NaHCO<sub>3</sub> (0.1 M) or DIPEA (5 eq). The reaction mixture is stirred at 30 °C for 2 hr then concentrated under reduced pressure to remove solvent and purified by prep-HPLC to give intermediate 2.

A mixture of intermediate 2 (1.0 eq) and Bicycle2 (1.0 eq., CD137 *Bicycle*) are dissolved in t-BuOH/H<sub>2</sub>O (1:1), and then CuSO<sub>4</sub> (1.0 eq), VcNa (2.3 eq) (sodium ascorbate), and THPTA (1.0 eq) (tris-hydroxypropyltriazolylmethylamine) are added. Finally, 0.2 M NH<sub>4</sub>HCO<sub>3</sub> is added to adjust pH to 8. The reaction mixture is stirred at 40°C for 16 hr under N<sub>2</sub> atmosphere and purified by prep-HPLC.

The following *Bicycle* TICAs were synthesized using the above general method (Table S6): BCY10571, BCY10572, BCY10573, BCY11373, BCY11616, BCY11858, BCY12238, BCY12377, BCY12378, BCY12379, BCY12481, BCY12572, BCY12573, BCY12574, BCY12576, BCY12579, BCY12580, BCY12581, BCY12582, BCY12583, BCY12709 and BCY12710. The Bicyclic peptides used in the synthesis of the Bicycle TICAs are listed in Table S7.

### Method B (N-(acid-Peg3)-N-bis(Peg3-azide) hinge)

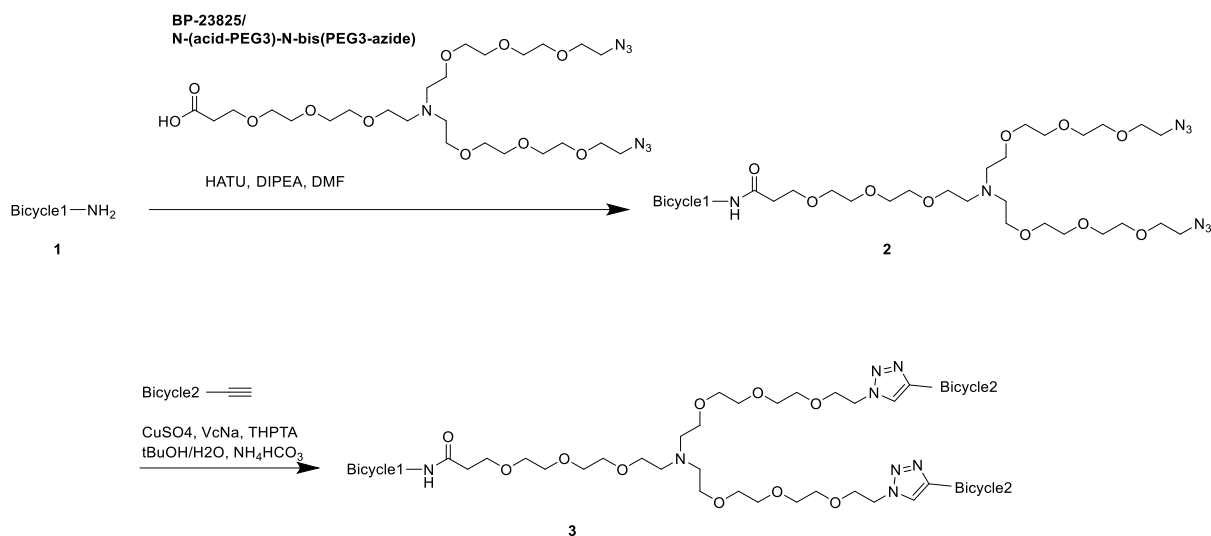

A solution of N-(acid-Peg3)-N-bis(Peg3-azide) (Broadpharm # BP23825, 1.0 eq), HATU (1.2 eq) and DIEA (2.0 eq) in DMF is mixed for 5 minutes, then Bicycle1 (Nectin-4 *Bicycle* or CD137 *Bicycle* for BCY11384), 1.2 eq.) is added. The reaction mixture is stirred at 40°C for 16 hr. The reaction mixture is then concentrated under reduced pressure to remove solvent and purified by prep-HPLC to give intermediate 2.

A mixture of intermediate 2 (1.0 eq) and Bicycle2 (CD137 *Bicycle* or Nectin-4 *Bicycle* for BCY11384), 2.0 eq) are dissolved in t-BuOH/H<sub>2</sub>O (1:1), and then CuSO<sub>4</sub> (1.0 eq), VcNa (4.0 eq), and THPTA (2.0 eq) are added. Finally, 0.2 M NH<sub>4</sub>HCO<sub>3</sub> is added to adjust pH to 8. The reaction mixture is stirred at 40°C for 16 hr under N<sub>2</sub> atmosphere and purified by prep-HPLC.

The following *Bicycle* TICAs were synthesized using the above general method (Table S6): BCY11384, BCY11385, BCY11863, BCY11864, BCY12484, BCY12485, BCY12486, BCY12487, BCY12586, BCY12587, BCY12588, BCY12760, BCY12761, BCY12797. The Bicyclic peptides used in the synthesis of the Bicycle TICAs are listed in Table S7.

### Method C (Azidoacetic acid linker)

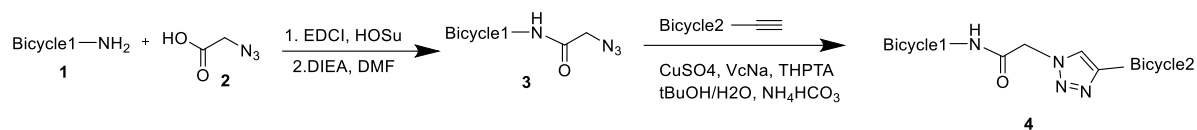

A mixture of azidoacetic acid (1.0 eq), EDCI (1.1 eq) and HOSu (1.0 eq) in DMF was stirred at 25-30 °C for 30 min. TLC indicated azidoacetic acid was consumed completely. A mixture of Bicycle1 (0.28 eq., Nectin-4 *Bicycle*) and DIEA (0.28 eq.) was added and stirred at 25-30 °C for 2 hr. The reaction mixture was concentrated and purified by prep-HPLC (TFA condition) to give intermediate **3**.

Intermediate **3** (1.0 eq.), Bicycle2 (1.0 eq., CD137 *Bicycle*), and THPTA (1.0 eq.) was dissolved in t-BuOH/H<sub>2</sub>O (1:1, 1 mL, pre-degassed and purged with N<sub>2</sub> for 3 times), and then CuSO<sub>4</sub> (1.0 eq.) and VcNa (1.0 eq.) were added under N<sub>2</sub>. The pH of this solution was adjusted to 8 by dropwise addition of 0.2 M NH<sub>4</sub>HCO<sub>3</sub> (in 1:1 t-BuOH/H<sub>2</sub>O), and the reaction mixture was stirred at 40 °C for 2 hr under N<sub>2</sub> atmosphere, concentrated and purified by prep-HPLC (TFA condition).

The following *Bicycle* TICAs were synthesized using the above general method (Table S6): BCY11373, BCY11374 and BCY11375. The Bicyclic peptides used in the synthesis of the Bicycle TICAs are listed in Table S7.

### Method D (Sar10-Peg12 linker)

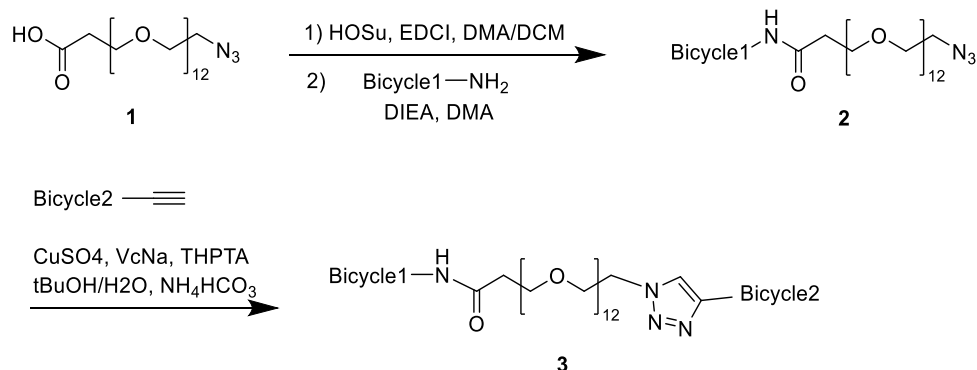

Compound **1** (1 eq, CD137 *Bicycle*), HOSu (1.5 eq) and EDCI (1.4 eq) in DMA/DCM (3:1 %v/v) was stirring at 20 °C for 2h. A mixture of Bicycle1 (1 eq, CD137 *Bicycle*) and DIEA (5 eq) in DMA was added to the reaction mixture, stirred for 5 h, concentrated and purified by prep-HPLC (TFA condition) to give intermediate **2**.

Intermediate **2** (1 eq) and Bicycle2 (1 eq, Nectin-4 *Bicycle* with Sar10-B-Ala-PYA on N-terminus) were dissolved in DMF, and aqueous ascorbic acid solution (1.0 eq) and CuSO<sub>4</sub> (1.0 eq) were added and stirred for 2 h at 20 °C and purified by prep-HPLC (TFA condition)

The following *Bicycle* TICAs were synthesized using the above general method (Table S6 and S7): BCY8854, BCY10000 and BCY10569.

### Synthesis of BCY9399

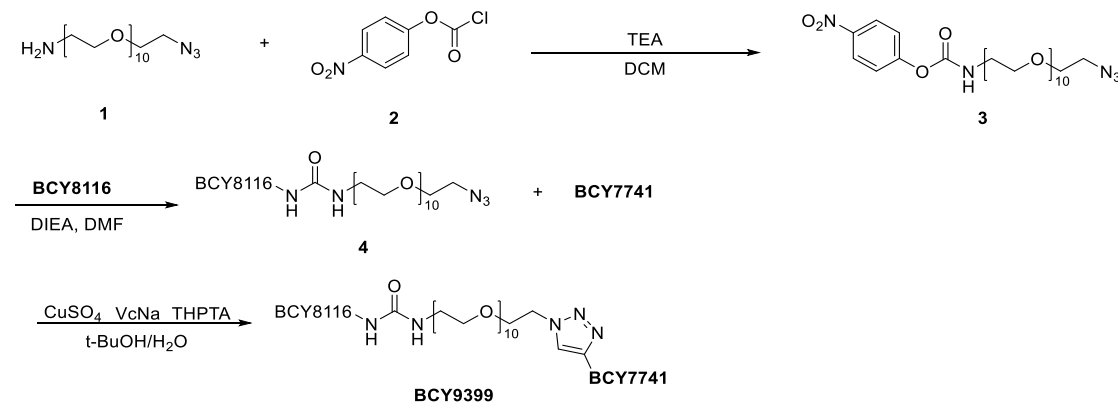

To a solution of **1** (30 mg, 56.7  $\mu\text{mol}$ ), **2** (17.22 mg, 85.45  $\mu\text{mol}$ ) in DCM (0.5 mL) was added TEA (8.65 mg, 85.45  $\mu\text{mol}$ , 11.9  $\mu\text{L}$ ). The mixture was stirred at 25  $^{\circ}\text{C}$  for 1 hr. LC-MS showed **1** was consumed completely and one main peak with desired m/z (calculated MW: 691.72, observed m/z: 692.3([M+H]<sup>+</sup>) and 709.3 ([M+NH<sub>4</sub>]<sup>+</sup>)) was detected. The reaction mixture was concentrated under reduced pressure to remove solvent to give a residue. The residue was purified by prep-HPLC (neutral condition). Compound **3** (30.5 mg) was obtained as a colorless oil.

To a solution of Compound **3** (15 mg, 21.68  $\mu\text{mol}$ ) and BCY8116 (47 mg, 21.68  $\mu\text{mol}$ ) in DMF (1 mL) was added DIEA (8.41 mg, 65.05  $\mu\text{mol}$ , 11.33  $\mu\text{L}$ ). The mixture was stirred at 30  $^{\circ}\text{C}$  for 2 hrs. LC-MS showed Compound **2** was consumed completely and one main peak with desired m/z (MW: 2725.1 observed m/z: 1362.7([M/2+H]<sup>+</sup>), 909.0([M/3+H]<sup>+</sup>)) was detected. The reaction mixture was filtered and concentrated under reduced pressure to give a residue. The crude product was purified by reversed-phase HPLC (TFA condition). Compound **4** (20 mg, 33.4% yield, 98.7% purity) was obtained as a white solid.

A mixture of Compound **4** (20.0 mg, 5.35  $\mu\text{mol}$ , 1.0 eq), BCY7741 (13.0 mg, 5.70  $\mu\text{mol}$ , 1.01 eq), and THPTA (0.4 M, 13.4  $\mu\text{L}$ , 1.0 eq) was dissolved in t-BuOH/H<sub>2</sub>O (1:1, 2 mL, pre-degassed and purged with N<sub>2</sub> for 3 times), and then CuSO<sub>4</sub> (0.4 M, 13.4  $\mu\text{L}$ , 1.0 eq) and VcNa (0.4 M, 26.8  $\mu\text{L}$ , 2.0 eq) were added under N<sub>2</sub>. The pH of this solution was adjusted to 8 by dropwise addition of 0.2 M NH<sub>4</sub>HCO<sub>3</sub> (in 1:1 t-BuOH/H<sub>2</sub>O), and the solution turned to light yellow. The reaction mixture was stirred at 25-30  $^{\circ}\text{C}$  for 12 hr under N<sub>2</sub> atmosphere. The reaction mixture was purified by prep-HPLC (TFA condition). **BCY9399** (9.1 mg, 27.2% yield) was obtained as a white solid.

## Synthesis of BCY9400

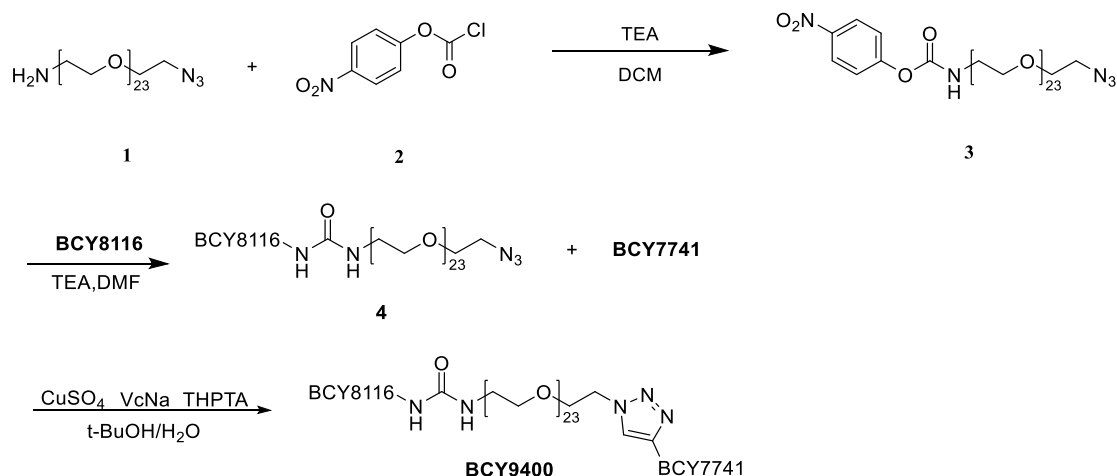

To a solution of Compound 1 (30.0 mg, 27.29  $\mu$ mol), Compound 2 (8.3 mg, 40.94  $\mu$ mol) in DCM (2 mL) was added TEA (4.14 mg, 40.94  $\mu$ mol, 5.7  $\mu$ L). Then the reaction mixture was stirred at 25-30 °C for 1 hr. LC-MS showed Compound 1 was consumed completely and one main peak with was detected. The reaction mixture was concentrated under reduced pressure and purified by prep-HPLC (neutral condition) to give compound 3 (18 mg) as a white solid.

To a solution of Compound 3 (15.5 mg, 7.12  $\mu$ mol) and **BCY8116** (9 mg, 7.12  $\mu$ mol) in DMF (2 mL) was added DIEA (1.4 mg, 10.68  $\mu$ mol, 1.9  $\mu$ L). The mixture was stirred at 30 °C for 2 hrs. LC-MS showed Compound 3 was consumed completely and one main peak with desired  $m/z$  (MW: 3297.78, observed  $m/z$ : 1099.7([M/3+H]<sup>+</sup>)) was detected. The crude product was purified by reversed phase HPLC (TFA condition). Compound 4 (19.5 mg, 83.1% purity) was obtained as a white solid.

A mixture of Compound 4 (19.5 mg, 5.91  $\mu$ mol), **BCY7741** (14 mg, 6.14  $\mu$ mol, 1.01eq), and THPTA (0.4 M, 15  $\mu$ L, 1 eq) was dissolved in t-BuOH/H<sub>2</sub>O (1:1, 2 mL, pre-degassed and purged with N<sub>2</sub> for 3 times), and then CuSO<sub>4</sub> (0.4 M, 15  $\mu$ L, 1 eq) and VcNa (0.4 M, 30  $\mu$ L, 2 eq) were added under N<sub>2</sub>. The pH of this solution was adjusted to 8 by dropwise addition of 0.2 M NH<sub>4</sub>HCO<sub>3</sub> (in 1:1 t-BuOH/H<sub>2</sub>O), and the solution turned to light yellow. The reaction mixture was stirred at 25-30 °C for 12 hr under N<sub>2</sub> atmosphere. The reaction mixture was directly purified by prep-HPLC (TFA condition). **BCY9400** (13.9 mg, 27.2% yield) was obtained as a white solid.

## Synthesis of BCY10578

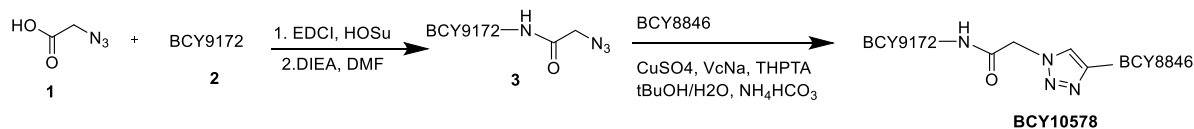

Compound 1 (5.0 mg, 49.5  $\mu$ mol, 1.0 eq) was first activated by mixing with EDCI (8.5 mg, 54.8  $\mu$ mol, 1.1 eq) and HOSu (5.7 mg, 49.5  $\mu$ mol, 1.0 eq). The mixture was stirred at 25-30 °C for 30 min. TLC indicated compound 1 was consumed completely and one new spot formed. Then

compound **BCY9172** (80.0 mg, 38.18  $\mu\text{mol}$ , 0.8 eq.) and DIEA (6.3 mg, 8.5  $\mu\text{L}$ , 49.5  $\mu\text{mol}$ , 1.0 eq.) were added to this mixture, and stirred at 40 °C for 1 hr, till LC-MS showed one main peak with desired  $m/z$  (calculated MW:2178.46, observed  $m/z$ : 1089.44 ( $[\text{M}/2+\text{H}]^+$ ) was detected. The reaction mixture was then concentrated under reduced pressure to remove solvent and produced a residue, followed by purification by prep-HPLC (TFA condition). Compound **2** (15 mg, 6.88  $\mu\text{mol}$ , 18.66% yield, 73.3% purity) was obtained as a white solid.

A mixture of compound **3** (9.8 mg, 4.5  $\mu\text{mol}$ , 1.0 eq.), **BCY8846** (14.0 mg, 4.6  $\mu\text{mol}$ , 1.0 eq.), and THPTA (2.0 mg, 4.6  $\mu\text{mol}$ , 1.0 eq.) was dissolved in t-BuOH/H<sub>2</sub>O (1:1, 1 mL, pre-degassed and purged with N<sub>2</sub> for 3 times), and then CuSO<sub>4</sub> (0.4 M, 12  $\mu\text{L}$ , 1.0 eq.) and VcNa (0.4 M, 24  $\mu\text{L}$ , 2.0 eq.) were added under N<sub>2</sub>. The pH of this solution was adjusted to 8 by dropwise addition of 0.2 M NH<sub>4</sub>HCO<sub>3</sub> (in 1:1 t-BuOH/H<sub>2</sub>O), and the solution turned to light yellow. The reaction mixture was stirred at 40 °C for 2 hr under N<sub>2</sub> atmosphere. The reaction mixture was filtered and concentrated under reduced pressure and purified by prep-HPLC (TFA condition), and **BCY10578** (13.78 mg, 58.66% yield) was obtained as a white solid.

### Synthesis of BCY10917

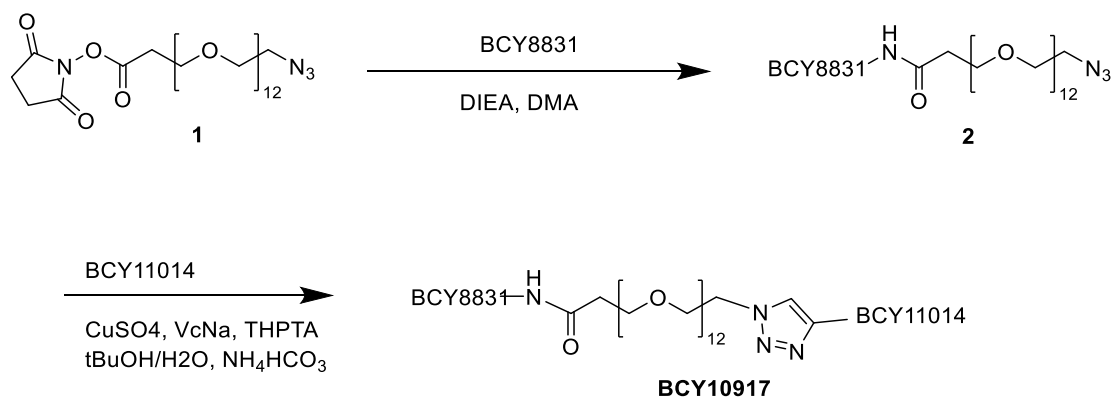

**BCY8831** (40.0 mg, 13.3  $\mu\text{mol}$ , 1.0 eq) and Compound **1** (10.5 mg, 14.2  $\mu\text{mol}$ , 1.07 eq) were dissolved in DMF (1 mL). The solution was added with DIPEA (2.6 mg, 20.09  $\mu\text{mol}$ , 3.5  $\mu\text{L}$ , 1.5 eq), and then the mixture was stirred at 30°C for 16 hr. LC-MS showed **BCY8831** was consumed completely and one main peak with desired  $m/z$  (calculated MW: 3635.16 observed  $m/z$ : 1212.0( $[\text{M}/3+\text{H}]^+$ )) was detected. The reaction mixture was purified by prep-HPLC (TFA condition) and Compound **2** (22.0 mg, 5.83  $\mu\text{mol}$ , 43.85% yield, 96.39% purity) was obtained as a white solid.

Compound **2** (10.0 mg, 2.75  $\mu\text{mol}$ , 1.0 eq) and **BCY11014** (5.98 mg, 2.75  $\mu\text{mol}$ , 1.0 eq), were dissolved in 2 mL of t-BuOH/H<sub>2</sub>O (1:1), and then CuSO<sub>4</sub> (0.4 M, 13.7  $\mu\text{L}$ , 2.0 eq), VcNa (1.1 mg, 5.55  $\mu\text{mol}$ , 2.0 eq) and THPTA (1.2 mg, 2.76  $\mu\text{mol}$ , 1.0 eq) were added. Finally 1 M NH<sub>4</sub>HCO<sub>3</sub> was added to adjust pH to 8. The reaction mixture was stirred at 30°C for 16 hr under N<sub>2</sub> atmosphere. The reaction mixture was purified by prep-HPLC (TFA condition) and **BCY10917** (6.4 mg, 39.03% yield) was obtained as a white solid.

### Synthesis of BCY10918



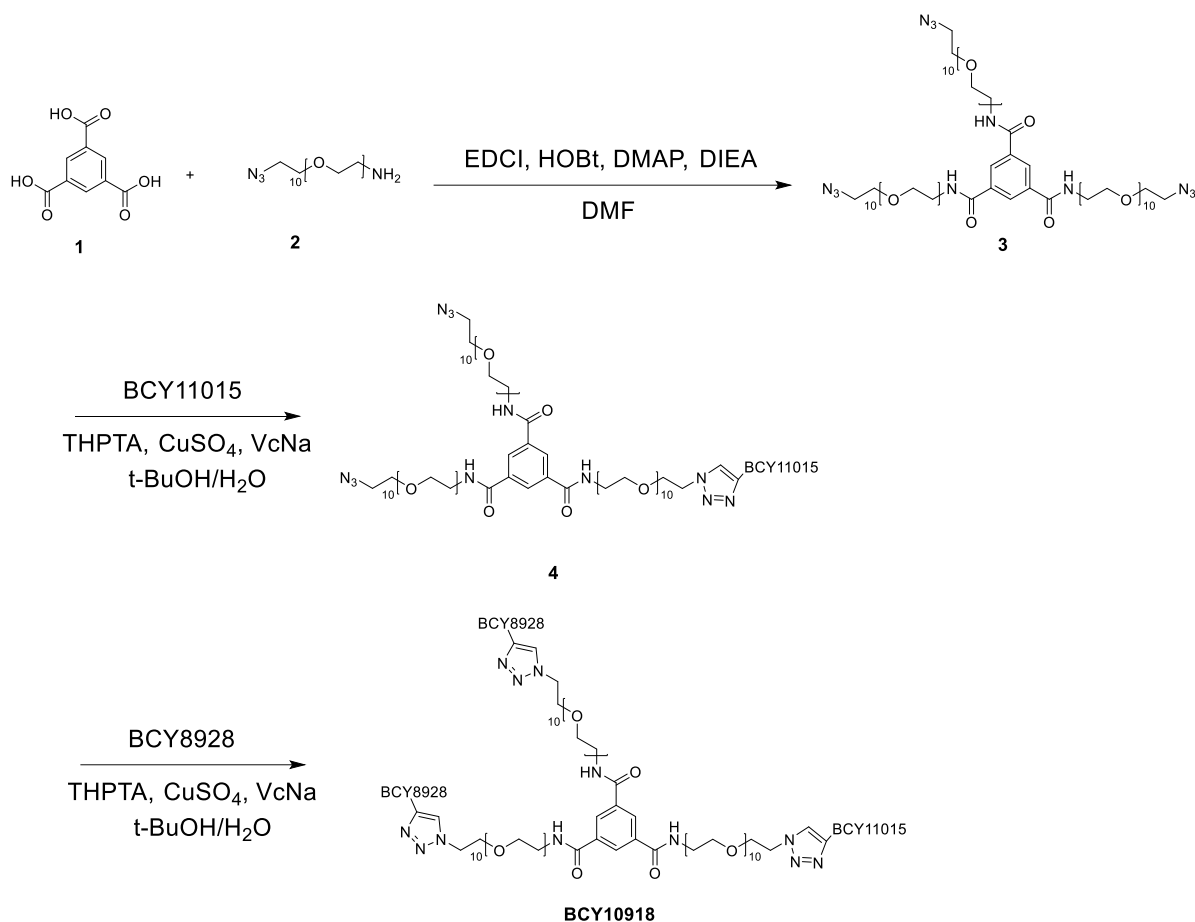

To a solution of Compound **1** (20.0 mg, 95.2  $\mu\text{mol}$ , 1.0 eq), Compound **2** (320.0 mg, 291.1  $\mu\text{mol}$ , 3.06 eq) in DMF (5 mL) was added EDCI (60.0 mg, 313.0  $\mu\text{mol}$ , 3.29 eq), HOBt (40.0 mg, 296.0  $\mu\text{mol}$ , 3.11 eq), DMAP (10.0 mg, 81.8  $\mu\text{mol}$ , 0.86 eq) and DIEA (44.5 mg, 344.5  $\mu\text{mol}$ , 60  $\mu\text{L}$ , 3.62 eq). The mixture was stirred at 30  $^{\circ}\text{C}$  for 12 hr. LC-MS showed Compound **1** was consumed completely and one main peak with desired  $m/z$  (calculated 30 MW: 3454.01, observed  $m/z$ : 1168.40( $[\text{M}/3+\text{H}_2\text{O}]^+$ )) was detected. The reaction mixture was concentrated under reduced pressure to remove solvent to give a residue. The residue was purified by prep-HPLC (TFA condition). Compound **3** (200.0 mg, 57.9  $\mu\text{mol}$ , 60.84% yield, 100% purity) was obtained as a white solid.

A mixture of Compound **3** (102 mg, 58.76  $\mu\text{mol}$ , 1.0 eq), **BCY11015** (92.6 mg, 41.13  $\mu\text{mol}$ , 0.7 eq) and THPTA (0.4 M, 146.9  $\mu\text{L}$ , 1.0 eq) was dissolved in t-BuOH/ $\text{H}_2\text{O}$  (1:1, 2 mL, pre-degassed and purged with  $\text{N}_2$  for 3 times), and then  $\text{CuSO}_4$  (0.4 M, 146.9  $\mu\text{L}$ , 1.0 eq) and VcNa (0.4 M, 293.8  $\mu\text{L}$ , 2.0 eq) were added under  $\text{N}_2$ . The pH of this solution was adjusted to 8 by dropwise addition of 0.2 M  $\text{NH}_4\text{HCO}_3$  (in 1:1 t-BuOH/ $\text{H}_2\text{O}$ ), and the solution turned to light yellow. The reaction mixture was stirred at 25-30  $^{\circ}\text{C}$  for 12 hr under  $\text{N}_2$  atmosphere. LC-MS showed Compound **3** was consumed completely and one main peak with desired  $m/z$  [MW: 3988.52 observed  $m/z$ : 1329.97( $[\text{M}/3+\text{H}^+]$ ) and 990.56 ( $[\text{M}/4+\text{H}^+]$ )] was detected. The reaction mixture was directly purified by prep-HPLC (TFA condition). Compound **4** (60 mg, 13.61  $\mu\text{mol}$ , 23.16% yield, 90.45% purity) was obtained as a white solid.

A mixture of Compound **4** (60 mg, 15.04  $\mu\text{mol}$ , 1.0 eq), **BCY8928** (72.0 mg, 32.47  $\mu\text{mol}$ , 2.2 eq) and THPTA (0.4 M, 37.6  $\mu\text{L}$ , 1.0 eq) was dissolved in t-BuOH/H<sub>2</sub>O (1:1, 2 mL, pre-degassed and purged with N<sub>2</sub> for 3 times), and then CuSO<sub>4</sub> (0.4 M, 37.6  $\mu\text{L}$ , 1.0 eq) and VcNa (0.4 M, 75.2  $\mu\text{L}$ , 2.0 eq) were added under N<sub>2</sub>. The pH of this solution was adjusted to 8 by dropwise addition of 0.2 M NH<sub>4</sub>HCO<sub>3</sub> (in 1:1 t-BuOH/H<sub>2</sub>O), and the solution turned to light yellow. The reaction mixture was stirred at 25-30 °C for 12 hr under N<sub>2</sub> atmosphere. The reaction mixture was directly purified by prep-HPLC (TFA condition). **BCY10918** (48 mg, 36.38% yield) was obtained as a white solid.

### Synthesis of BCY11027

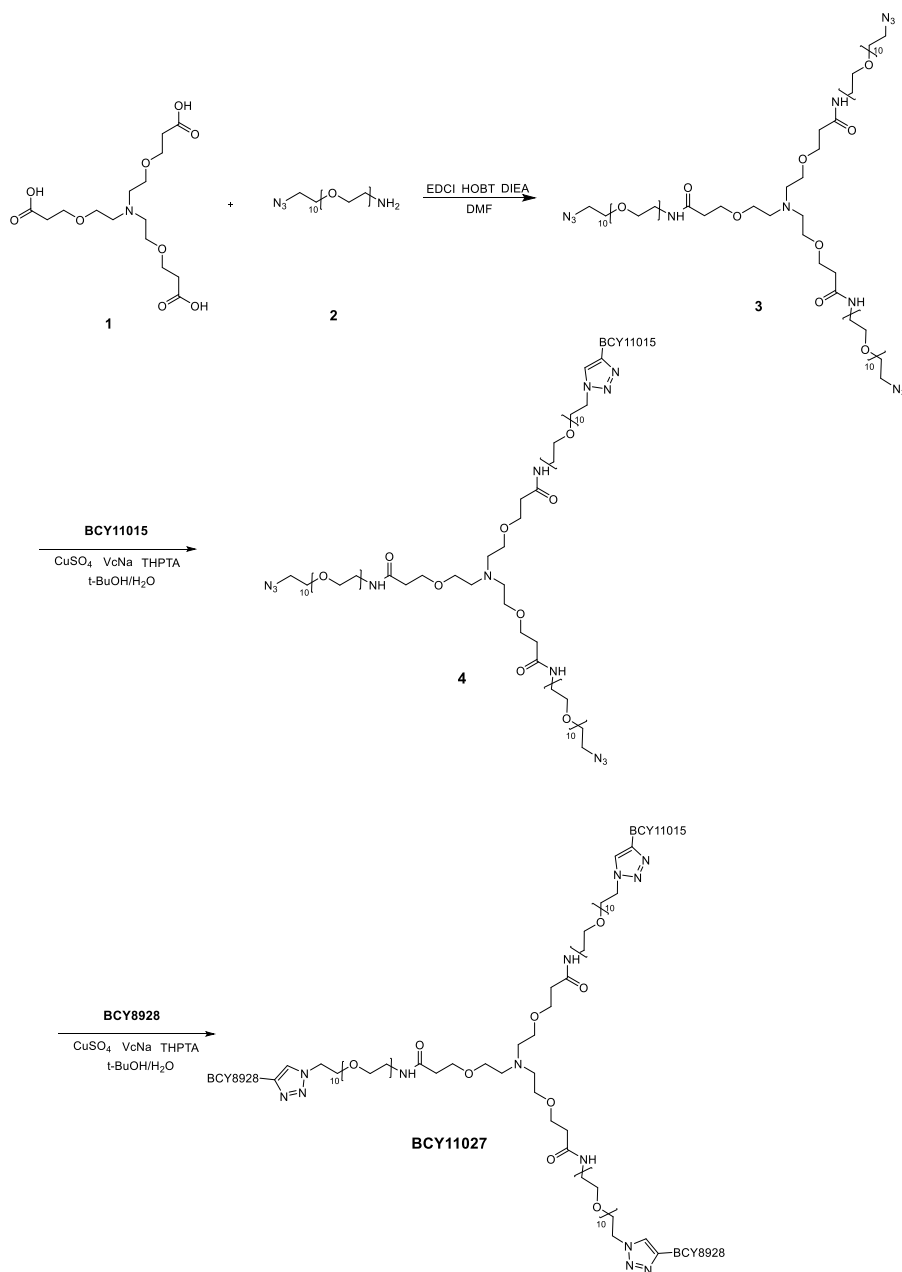

To a solution of Compound **1** (100 mg, 248.9  $\mu\text{mol}$ , 1 eq, HCl) in DMF (1 mL) was added EDCI (160 mg, 834.6  $\mu\text{mol}$ , 3.4 eq) and HOBT (110 mg, 814.1  $\mu\text{mol}$ , 3.3 eq) and DIPEA (193 mg, 1.49 mmol, 260.08  $\mu\text{L}$ , 6.0 eq), then Compound **2** (400 mg, 759.6  $\mu\text{mol}$ , 3.1 eq) in DMF (1 mL) was added dropwise. The mixture was stirred at 25-30 °C for 12 hrs. LC-MS showed Compound **1** was consumed completely and one main peak with desired  $m/z$  was detected. The reaction mixture was purified by prep-HPLC (TFA condition) to give Compound **3** (128 mg, 64.3  $\mu\text{mol}$ , 25.8% yield, 95% purity) as a colorless oil.

All solvents were degassed and purged with  $\text{N}_2$  for 3 times. Compound **3** (22.0 mg, 10.58  $\mu\text{mol}$ , 1.0 eq) and **BCY11015** (26.0 mg, 34.72  $\mu\text{mol}$ , 1.1 eq) were first dissolved in 2 mL of  $t\text{-BuOH}/\text{H}_2\text{O}$  (1:1), and then  $\text{CuSO}_4$  (0.4 M, 26.4  $\mu\text{L}$ , 1.0 eq), VcNa (4.2 mg, 21.2  $\mu\text{mol}$ , 2.0 eq) and THPTA (4.6 mg, 10.58  $\mu\text{mol}$ , 1.0 eq) were added. Finally, 1 M  $\text{NH}_4\text{HCO}_3$  was added to adjust pH to 8. The reaction mixture was stirred at 30°C for 16 hr under  $\text{N}_2$  atmosphere. LC-MS showed one main peak with desired  $m/z$  (calculated MW: 4143.75, observed  $m/z$ : 1040.50 ( $[(M+18)/4+H]^+$ ), and 1381.27 ( $[M/3+H]^+$ )). The reaction mixture was purified by prep-HPLC (TFA condition) and Compound **4** (11.0 mg, 2.50  $\mu\text{mol}$ , 23.66% yield, 94.26% purity) was obtained as a white solid.

Compound **4** (5.5 mg, 1.33  $\mu\text{mol}$ , 1.0 eq) and **BCY8928** (5.9 mg, 2.66  $\mu\text{mol}$ , 2.0 eq) were first dissolved in 2 mL of  $t\text{-BuOH}/\text{H}_2\text{O}$  (1:1), and then  $\text{CuSO}_4$  (0.4 M, 10.0  $\mu\text{L}$ , 3.0 eq), VcNa (1.0 mg, 5.05  $\mu\text{mol}$ , 3.8 eq) and THPTA (1.0 mg, 2.30  $\mu\text{mol}$ , 1.7 eq) were added. Finally, 1 M  $\text{NH}_4\text{HCO}_3$  was added to adjust pH to 8. All solvents here were degassed and purged with  $\text{N}_2$  for 3 times. The reaction mixture was stirred at 35°C for 16 hr under  $\text{N}_2$  atmosphere. The reaction mixture was purified by prep-HPLC (TFA condition) and **BCY11027** (2.8 mg, 24.5% yield, 91.71% purity) was obtained as a white solid.

## Synthesis of BCY11022

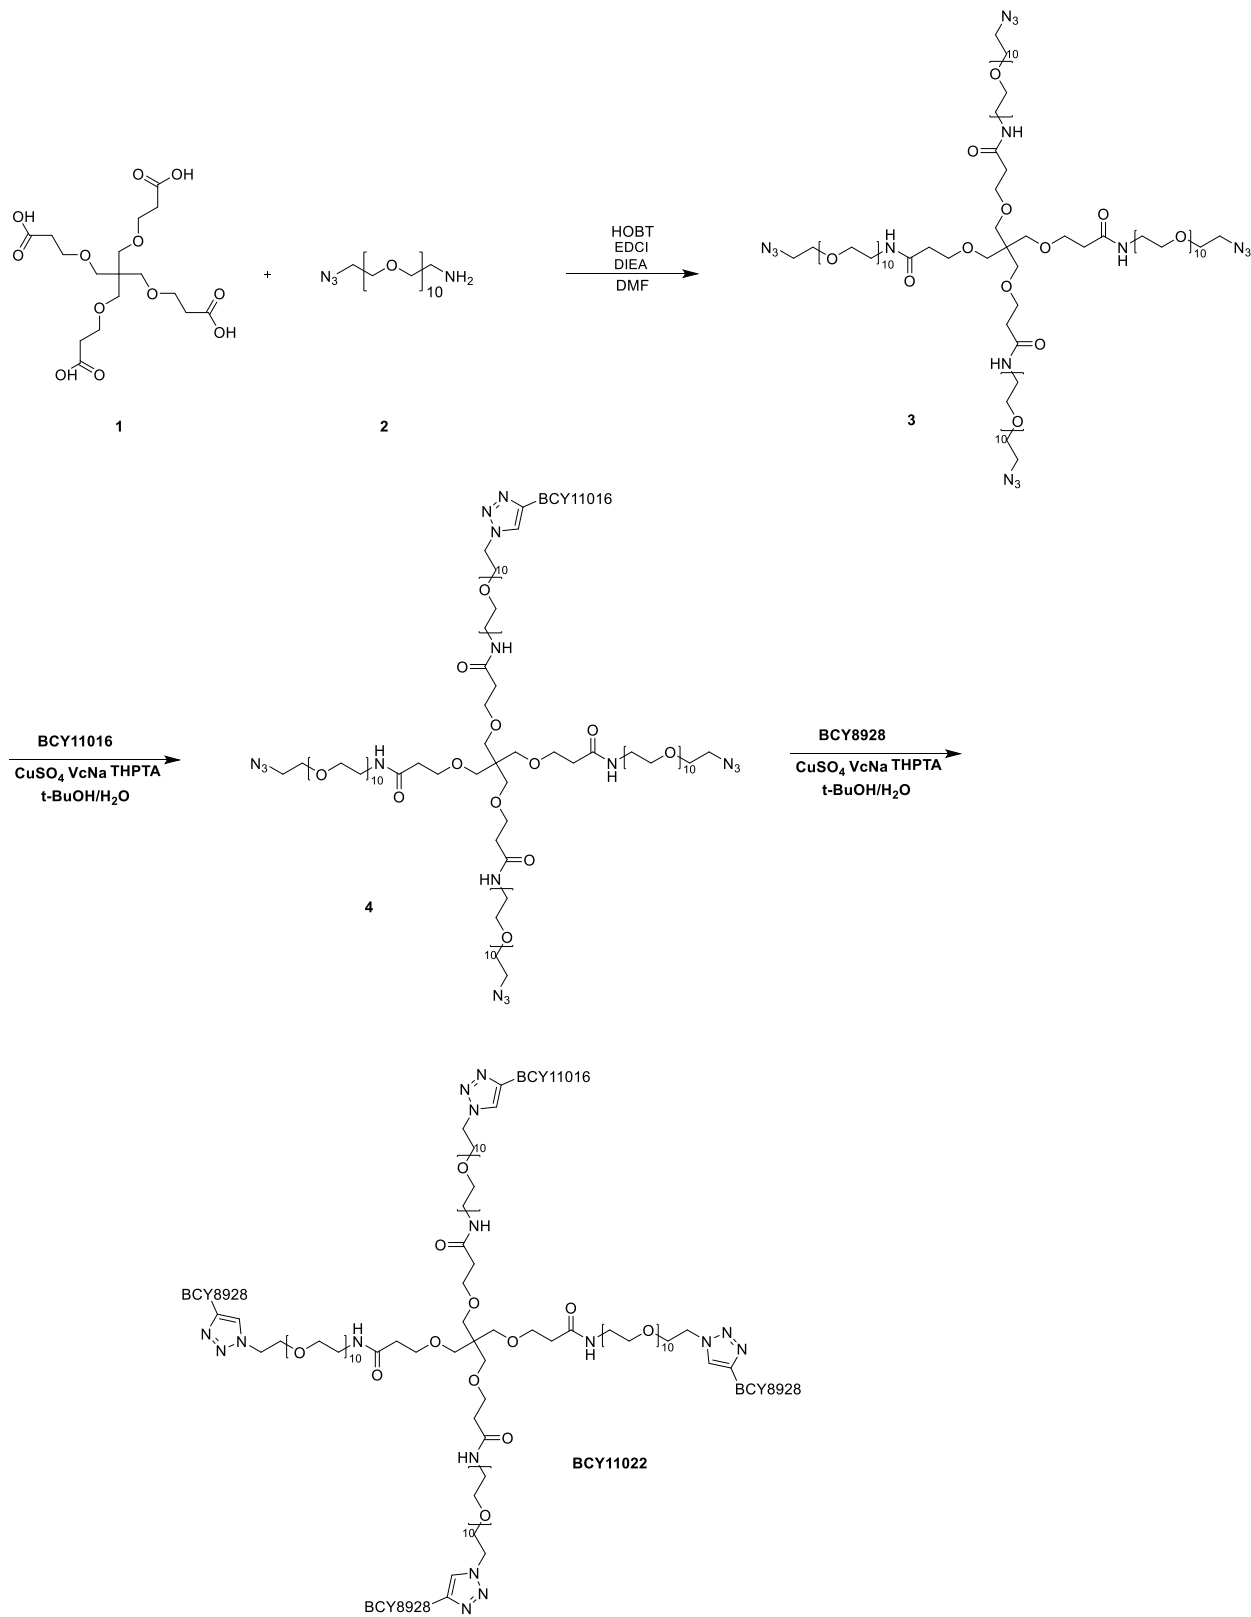

To a solution of compound **1** (100 mg, 235.63  $\mu\text{mol}$ , 1 eq) in DMF (1 mL) was added EDCI (200 mg, 1.04 mmol, 4.43 eq) and HOBt (140 mg, 1.04 mmol, 4.4 eq) and DIPEA (185.50 mg, 1.44 mmol, 0.25 mL, 6.09 eq), then compound **2** (500 mg, 949.45  $\mu\text{mol}$ , 4.03 eq) in DMF (1 mL) was added dropwise. The mixture was stirred at 25-30  $^{\circ}\text{C}$  for 12 hrs. The reaction mixture was purified by prep-HPLC (TFA condition) to give compound **3** (385 mg, 148.75  $\mu\text{mol}$ , 63.13% yield, 95% purity) as a light yellow oil  $m/z$  (MW: 2458.85 observed  $m/z$ : 1229.40 ( $[\text{M}/2+\text{H}^{\dagger}]$ )).

Compound **3** (4.8 mg, 1.95  $\mu\text{mol}$ , 1.0 eq.), **BCY11016** (4.1 mg, 1.76  $\mu\text{mol}$ , 0.9 eq.), and THPTA (1.0 mg, 2.0  $\mu\text{mol}$ , 1.0 eq.) were dissolved in *t*-BuOH/ $\text{H}_2\text{O}$  (1:1, 1 mL, pre-degassed and purged with  $\text{N}_2$  for 3 times), and then  $\text{CuSO}_4$  (10.0  $\mu\text{L}$ , 0.4M, 2.0 eq.) and VcNa (0.4 M, 5.1  $\mu\text{L}$ , 2.0 eq.) were added under  $\text{N}_2$ . The pH of this solution was adjusted to 8 by dropwise addition of 0.2 M  $\text{NH}_4\text{HCO}_3$  (in 1:1 *t*-BuOH/ $\text{H}_2\text{O}$ ), and the solution turned light yellow. The reaction mixture was stirred at 40  $^{\circ}\text{C}$  for 4 hr, till LC-MS showed one main peak with desired  $m/z$  (calculated MW: 4782.46, observed  $m/z$ : 1196.1 ( $[\text{M}/4+\text{H}^{\dagger}]$ )). The reaction mixture was then concentrated under reduced pressure and purified by prep-HPLC (TFA condition). Compound **4** (2.7 mg, 0.56  $\mu\text{mol}$ , 27.3% yield, 94.5% purity) was obtained as a white solid after lyophilization.

Compound **4** (2.7 mg, 0.6  $\mu\text{mol}$ , 1.0 eq.), **BCY8928** (5.3 mg, 2.38  $\mu\text{mol}$ , 4.0 eq.), and THPTA (0.9 mg, 2.1  $\mu\text{mol}$ , 3.5 eq.) were dissolved in *t*-BuOH/ $\text{H}_2\text{O}$  (1:1, 1 mL, pre-degassed and purged with  $\text{N}_2$  for 3 times), and then  $\text{CuSO}_4$  (0.4 M, 6.0  $\mu\text{L}$ , 4.0 eq.) and VcNa (0.4 M, 6.0  $\mu\text{L}$ , 4.0 eq.) were added under  $\text{N}_2$ . The pH of this solution was adjusted to 8 by dropwise addition of 0.2 M  $\text{NH}_4\text{HCO}_3$  (in 1:1 *t*-BuOH/ $\text{H}_2\text{O}$ ), and the solution turned light yellow. The reaction mixture was stirred at 40  $^{\circ}\text{C}$  for 4 hr under  $\text{N}_2$  atmosphere. The reaction mixture was concentrated under reduced pressure and purified by prep-HPLC (TFA condition). **BCY11022** (1.9 mg, 23.2% yield) was obtained as a white solid after lyophilization.

### Synthesis of BCY12970

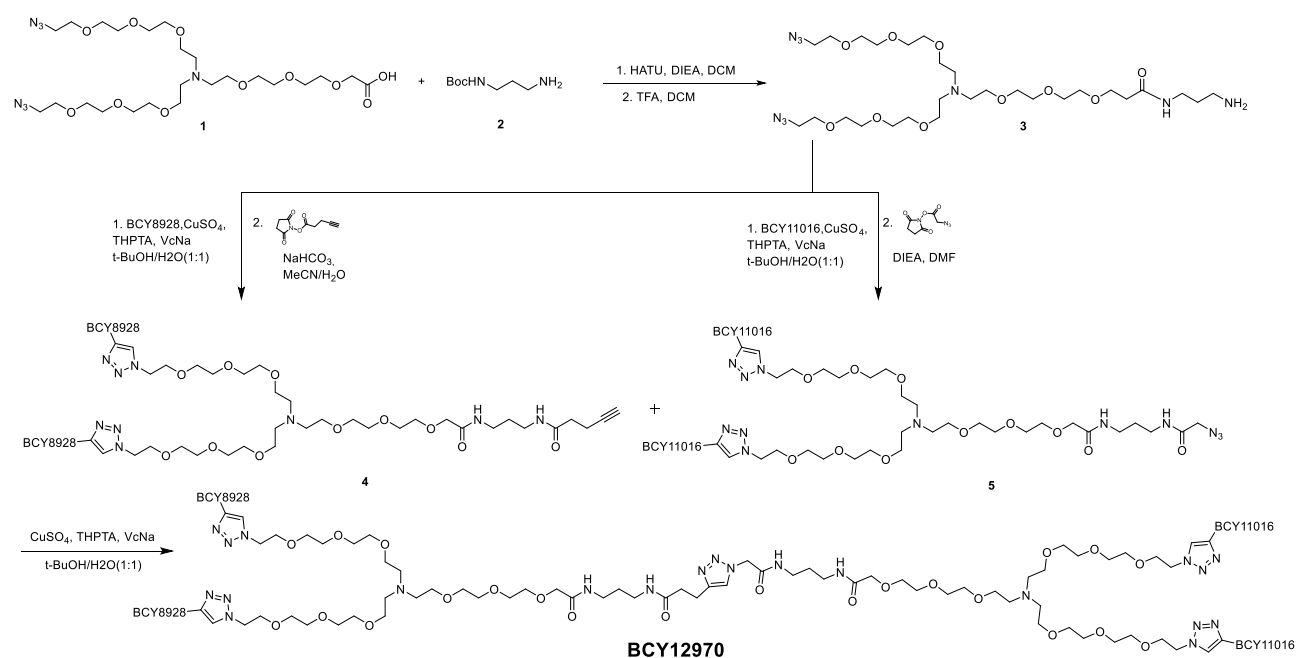

Compound **1** (20.0 mg, 32.07  $\mu\text{mol}$ , 1.0 eq.) was dissolved in DCM and HATU (13.4 mg, 35.27  $\mu\text{mol}$ , 1.1 eq.) and DIEA (11.2  $\mu\text{L}$ , 2.0 eq.) was added and stirred for 30 min. Compound **2** (6.7 mg, 38.48  $\mu\text{mol}$ , 1.2 eq.) was added and stirred for 0.5 h. LC-MS showed compound **1** was consumed completely and one main peak with desired  $m/z$  (cal. MW: 779.92, observed  $m/z$ :  $[\text{M}+\text{H}]^+=780.4$ ) was detected. The reaction mixture was concentrated under reduced pressure to remove solvent and produced a residue. The crude product was used into next step without further purification by dissolving in 20% TFA/DCM (0.5 mL). The reaction mixture was stirred at 20-25  $^{\circ}\text{C}$  for 0.5 hr. LC-MS showed one main peak with desired  $m/z$  (MW:679.92, observed  $m/z$ :  $[\text{M}+\text{H}]^+ 680.4$ ) was detected. Compound **3** (21.8 mg, 32.07  $\mu\text{mol}$ ) was obtained as a yellow oil without further purification. A second batch of Compound **3** was also prepared.

- (a) To first batch of compound **3** (21.8 mg, 32.07  $\mu\text{mol}$ , 1.0 eq.), **BCY8928** (142.2 mg, 64.14  $\mu\text{mol}$ , 2.0 eq.), and THPTA (28.0 mg, 64.14  $\mu\text{mol}$ , 2.0 eq.) were dissolved in *t*-BuOH/H<sub>2</sub>O (1:1, 1 mL, pre-degassed and purged with N<sub>2</sub> for 3 times), and then CuSO<sub>4</sub> (0.4 M, 160.0  $\mu\text{L}$ , 2.0 eq.) and VcNa (26.8 mg, 128.28  $\mu\text{mol}$ , 4.0 eq.) were added under N<sub>2</sub>. The pH of this solution was adjusted to 8 by dropwise addition of 0.2 M NH<sub>4</sub>HCO<sub>3</sub> (in 1:1 *t*-BuOH/H<sub>2</sub>O), and the solution turned to light yellow. The reaction mixture was stirred at 20-25  $^{\circ}\text{C}$  for 0.5 hr under N<sub>2</sub> atmosphere. LC-MS showed compound **3** was consumed completely and desired  $m/z$  (cal. MW: 5114.96, observed  $m/z$ : 1705.7( $[\text{M}/3+\text{H}]^+$ ), 1279.3( $[\text{M}/4+\text{H}]^+$ )) was detected. The reaction mixture was filtered to remove the undissolved residue. The crude product was purified by prep-HPLC (TFA condition), and an intermediate (68.4 mg, 12.85  $\mu\text{mol}$ , 40.07% yield, 96.1% purity) was obtained as a white solid. Activated NHS ester of 4-penynoic acid (1.5mg, 7.31  $\mu\text{mol}$ , 1.1 eq) was added to the purified intermediate (34.0 mg, 6.65  $\mu\text{mol}$ , 1.0 eq.) in MeCN/H<sub>2</sub>O and pH was adjusted to 8 using 0.4 M NaHCO<sub>3</sub> and stirred for 1 h and purified by RP-HPLC to obtain Compound **4** (31.3 mg, 5.42  $\mu\text{mol}$ , 16.91% yield, 92.3% purity) (calculated MW: 5327.09, observed  $m/z$ : 1332.5( $[\text{M}/4+\text{H}]^+$ ))
- (b) To second batch of compound **3**, **BCY11016** (149.0 mg, 64.14  $\mu\text{mol}$ , 2.0 eq.), and THPTA (13.9 mg, 32.07  $\mu\text{mol}$ , 1.0 eq.) were dissolved in *t*-BuOH/H<sub>2</sub>O (1:1, 1 mL, pre-degassed and purged with N<sub>2</sub> for 3 times), and then CuSO<sub>4</sub> (0.4 M, 160.0  $\mu\text{L}$ , 2.0 eq.) and VcNa (25.4 mg, 128.28  $\mu\text{mol}$ , 4.0 eq. were added under N<sub>2</sub>. The reaction mixture was stirred at 20-25  $^{\circ}\text{C}$  for 0.5 hr under N<sub>2</sub> atmosphere. LC-MS showed compound **3** was consumed completely and desired  $m/z$  (calculated MW: 5327.09, observed  $m/z$ : 1332.5( $[\text{M}/4+\text{H}]^+$ )) was detected. The reaction mixture was filtered to remove the undissolved residue. The crude product was purified by prep-HPLC (TFA condition), and an intermediate (31.3 mg, 5.42  $\mu\text{mol}$ , 16.91% yield, 92.3% purity) was obtained as a white solid. Activated NHS ester of azidoacetic acid (0.4 mg, 2.06  $\mu\text{mol}$ , 1.1 eq.) was added to the purified intermediate (10.0 mg, 1.88  $\mu\text{mol}$ , 1.0 eq.) in DMF and DIEA was added and stirred for 0.5 h and purified by RP-HPLC to obtain compound **5** (3.9 mg, 0.66  $\mu\text{mol}$ , 35.29% yield, 91.9% purity) (cal. MW: 5410.14, observed  $m/z$ : 1803.5( $[\text{M}/3+\text{H}]^+$ ), 1353.6( $[\text{M}/4+\text{H}]^+$ ), 1083.0( $[\text{M}/5+\text{H}]^+$ )).

A mixture of compound **4** (3.74 mg, 0.72  $\mu\text{mol}$ , 1.0 eq.), compound **5** (3.9 mg, 0.72  $\mu\text{mol}$ , 1.0 eq.), and THPTA (0.3 mg, 0.72  $\mu\text{mol}$ , 1.0 eq.) was dissolved in *t*-BuOH/H<sub>2</sub>O (1:1, 1 mL, pre-degassed and purged with N<sub>2</sub> for 3 times), and then CuSO<sub>4</sub> (0.4 M, 2.0  $\mu\text{L}$ , 1.0 eq.) and VcNa (0.3 mg, 1.44  $\mu\text{mol}$ , 2.0 eq.) were added under N<sub>2</sub>. The pH of this solution was adjusted to 8 by dropwise addition of 0.2 M NH<sub>4</sub>HCO<sub>3</sub> (in 1:1 *t*-BuOH/H<sub>2</sub>O), and the solution turned to light

yellow. The reaction mixture was stirred at 20-25 °C for 1 hr under N<sub>2</sub> atmosphere. LC-MS showed compound **4** was consumed completely and one main peak with desired m/z (cal. MW: 10605.18, observed m/z: 1768.5 ([M/6+H]<sup>+</sup>), 1515.7 ([M/7+H]<sup>+</sup>), 1526.4 ([M/8+H]<sup>+</sup>), 1589.3([M/9+H]<sup>+</sup>)) was detected. The reaction mixture was filtered to remove the undissolved residue. The crude product was purified by prep-HPLC (TFA condition), and **BCY12970** (4.5 mg, 55.04% yield) was obtained as a white solid.

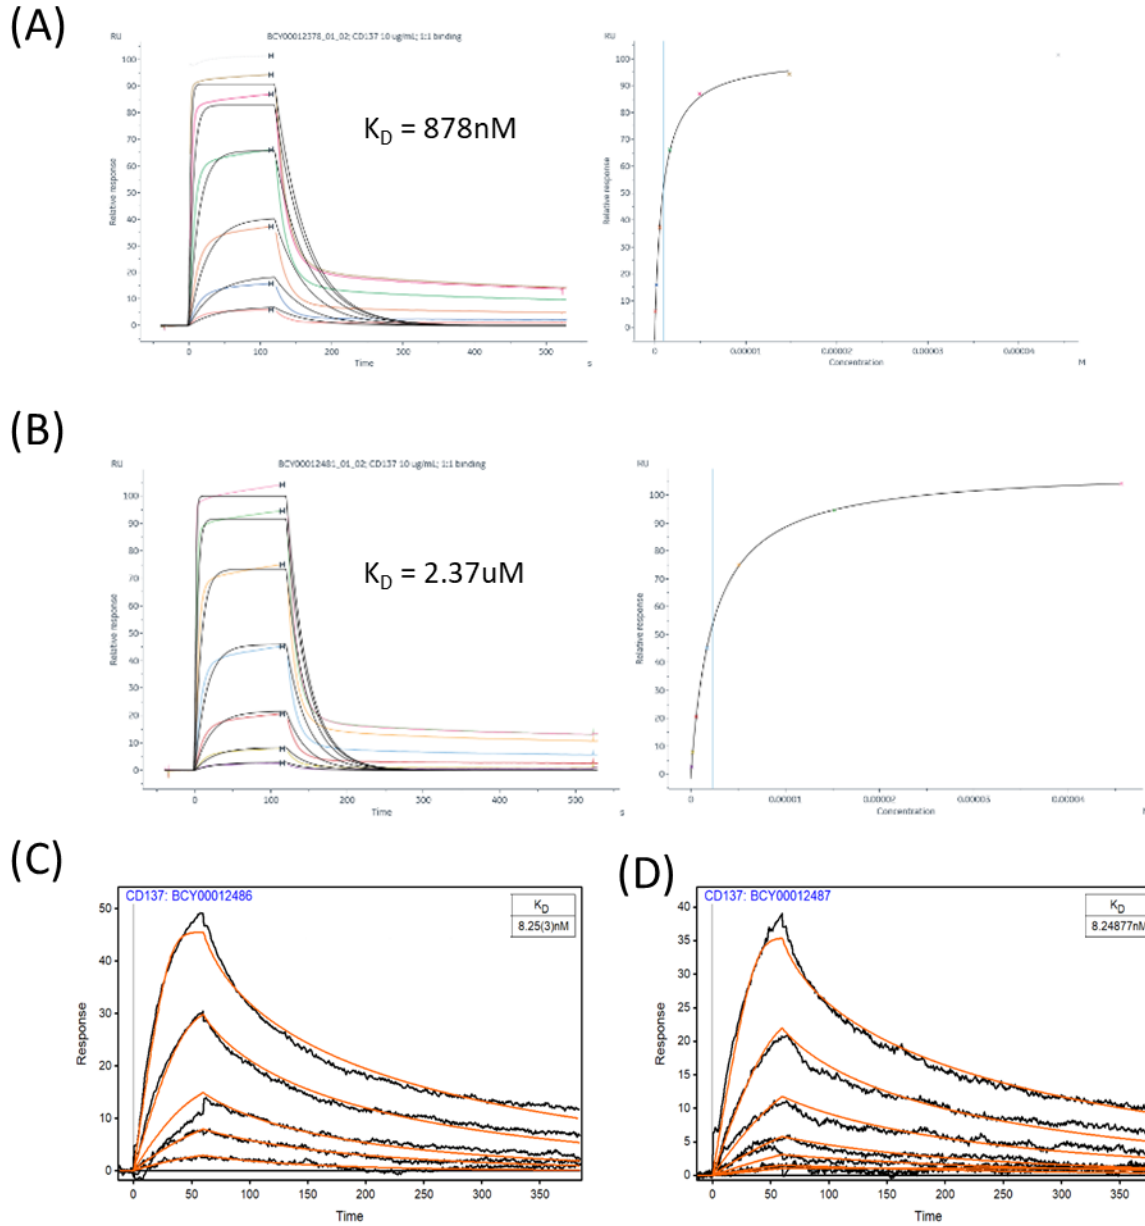

**Fig. S1. SPR sensorgrams measuring CD137 binding of *Bicycle* TICAs incorporating weak CD137 binders in 1:1 and 1:2 format.** (A and B) Sensorgram and  $K_D$  (nM) of 1:1 format *Bicycle* TICA (A) BCY12378 and (B) BCY12481 to immobilized CD137. (C and D) Sensorgrams of 1:2 Nectin-4/CD137 format *Bicycle* TICAs (C) BCY12486 and (D) BCY12487 incorporating the same CD137 binders as BCY12378 and BCY12481 and their enhanced affinity to immobilized CD137 due to avidity. The ‘apparent’  $K_D$  of the dimeric CD137 binding motifs are shown.



**Table S1. SPR binding affinity of 1:1 Nectin-4/CD137 *Bicycle* TICAs for Nectin-4 and CD137**

| <b>BCY</b> | <b>CD137 K<sub>D</sub> (nM)</b> | <b>Nectin-4 K<sub>D</sub> (nM)</b> |
|------------|---------------------------------|------------------------------------|
| BCY8854    | 108                             | 2.8                                |
| BCY9399    | 73                              | 1.7                                |
| BCY9400    | 53                              | 1.8                                |
| BCY10000   | 6.2                             | 2.3                                |
| BCY10571   | 12                              | 0.9                                |
| BCY10572   | 3.4                             | 1.8                                |
| BCY10573   | 3.4                             | 1.1                                |
| BCY11373   | 12                              | 0.7                                |
| BCY11374   | 9.0                             | 1.0                                |
| BCY11375   | 3.5                             | 1.0                                |
| BCY11616   | 43                              | 2.2                                |
| BCY11858   | 3.7                             | 14                                 |
| BCY12238   | 4.3                             | 1.3                                |
| BCY12377   | 9.6                             | 1.7                                |
| BCY12379   | 4.5                             | 2.0                                |
| BCY12572   | 30                              | 1.6                                |
| BCY12573   | 12                              | 1.4                                |
| BCY12574   | 49                              | 1.0                                |
| BCY12576   | 3.2                             | 2.2                                |
| BCY12579   | 3.2                             | 0.7                                |
| BCY12580   | 7.2                             | 1.8                                |
| BCY12581   | 7.6                             | 1.7                                |
| BCY12582   | 6.4                             | 1.8                                |
| BCY12583   | 8.4                             | 4.2                                |
| BCY12378   | 878                             | 1.4                                |
| BCY12481   | 2370                            | 2.5                                |

**Table S2. Geometric Mean of EC50 (nM) and Emax (fold induction over background) for HT1376/CD137 reporter coculture assay**

| BCY      | n  | EC50 (SD factor) | Emax (SD factor) |
|----------|----|------------------|------------------|
| BCY8854  | 4  | 4.0 (1.3)        | 25 (1.2)         |
| BCY9399  | 3  | 3.1 (1.4)        | 23 (1.5)         |
| BCY9400  | 3  | 5.2 (1.5)        | 24 (1.4)         |
| BCY10000 | 50 | 1.1 (1.7)        | 36 (1.5)         |
| BCY10569 | 3  | 2.1 (1.3)        | 44 (1.4)         |
| BCY10571 | 3  | 3.2 (1.3)        | 37 (1.4)         |
| BCY10572 | 10 | 1.3 (1.7)        | 31 (1.3)         |
| BCY10573 | 3  | 1.5 (1.3)        | 31 (1.5)         |
| BCY10578 | 3  | 2.0 (1.4)        | 42 (1.3)         |
| BCY10917 | 3  | 1.1 (1.5)        | 39 (1.3)         |
| BCY10918 | 3  | 0.15 (1.5)       | 64 (1.2)         |
| BCY11022 | 7  | 0.17 (1.6)       | 51 (1.8)         |
| BCY11027 | 5  | 0.14 (1.7)       | 40 (1.4)         |
| BCY11373 | 3  | 0.83 (1.6)       | 42 (1.4)         |
| BCY11374 | 3  | 1.1(1.8)         | 44 (1.3)         |
| BCY11375 | 3  | 0.85 (2.0)       | 37 (1.4)         |
| BCY11384 | 3  | 1.6 (3.7)        | 21 (1.5)         |
| BCY11385 | 3  | 0.20 (2.2)       | 59 (1.4)         |
| BCY11616 | 7  | 2.4 (2.1)        | 28 (1.4)         |
| BCY11858 | 3  | 7.0 (1.5)        | 33(1.3)          |
| BCY11863 | 13 | 0.22 (2.4)       | 54 (1.5)         |
| BCY11864 | 10 | 0.90 (2)         | 46 (1.6)         |
| BCY12238 | 3  | 1.6 (1.6)        | 44 (1.4)         |
| BCY12377 | 3  | 0.86 (1.7)       | 44 (1.3)         |
| BCY12378 | 3  | 26.9 (1.9)       | 5.1 (1.6)        |
| BCY12379 | 3  | 0.64 (1.6)       | 45 (1.3)         |
| BCY12481 | 3  | 34 (3.2)         | 2.2 (1.2)        |
| BCY12484 | 3  | 0.34 (1.5)       | 63 (1.3)         |
| BCY12485 | 3  | 0.27 (1.2)       | 70 (1.3)         |
| BCY12486 | 3  | 14 (1.7)         | 25 (1.5)         |
| BCY12487 | 3  | 12 (1.6)         | 11 (1.6)         |
| BCY12572 | 3  | 3.4 (1.4)        | 37 (1.4)         |
| BCY12573 | 3  | 2.4 (1.4)        | 39 (1.3)         |
| BCY12574 | 3  | 5.6 (1.5)        | 34 (1.3)         |
| BCY12576 | 3  | 2.1 (1.4)        | 43 (1.3)         |
| BCY12579 | 3  | 0.57 (1.5)       | 39 (1.2)         |
| BCY12580 | 3  | 1.2 (1.3)        | 42 (1.2)         |
| BCY12581 | 3  | 1.5 (1.4)        | 42 (1.2)         |
| BCY12582 | 3  | 1.9 (1.2)        | 40 (1.2)         |
| BCY12583 | 3  | 2.2 (1.3)        | 41 (1.2)         |
| BCY12586 | 3  | 0.63 (1.4)       | 75 (1.2)         |
| BCY12587 | 3  | 0.26 (1.4)       | 67 (1.2)         |
| BCY12588 | 3  | 0.82 (1.4)       | 71 (1.2)         |
| BCY12709 | 3  | 6.5 (1.3)        | 31 (1.5)         |
| BCY12710 | 3  | 3.2 (1.4)        | 42 (1.2)         |
| BCY12760 | 3  | 1.7 (1.3)        | 76 (1.2)         |
| BCY12761 | 3  | 0.35 (1.3)       | 75 (1.1)         |
| BCY12797 | 32 | Not active (NA)  | 1.9 (1.3)        |
| BCY12970 | 5  | 0.052 (1.6)      | 48 (1.1)         |

**Table S3. EC50 (Mean ± SD) of *Bicycle* TICAs in the PBMC/HT1376 coculture assay (each BCY run in duplicate or triplicate in each experiment)**

| BCY          | No. of independent experiments | INF $\gamma$ EC50 (nM) | IL-2 EC50 (nM) |
|--------------|--------------------------------|------------------------|----------------|
| BCY11385     | 4                              | 0.43 ± 0.13            | 0.47 ± 0.30    |
| BCY11863(24) | 13                             | 0.22 ± 0.12            | 0.36 ± 0.23    |
| BCY11864     | 4                              | 0.90 ± 0.21            | 0.83 ± 0.19    |
| BCY10572     | 2                              | 1.3                    | 1.6            |
| BCY10000     | 2                              | 2.3                    | 0.69           |
| BCY12587     | 6                              | 6.3 ± 5.7              | 4.4 ± 1.9      |
| BCY8854      | 2                              | 14                     | 8.1            |
| BCY13144     | 2                              | No Induction           | No Induction   |

**Table S4. Pharmacokinetic parameters of *Bicycle* TICAs in SD Rats**

| BCY      | fu,p  | n | CL (mL/min/kg) | Vdss (L/kg) | t $\frac{1}{2}$ (h) | CL, u (mL/min/kg) | Vdss, u (L/kg) |
|----------|-------|---|----------------|-------------|---------------------|-------------------|----------------|
| BCY10000 | 0.34  | 3 | 19 ± 2         | 0.46 ± 0.05 | 0.36 ± 0.04         | 55                | 1.4            |
| BCY10572 | 0.37  | 3 | 18 ± 2         | 1.0 ± 0.3   | 0.93 ± 0.30         | 50                | 2.8            |
| BCY10573 | ND    | 3 | 16 ± 3         | 0.84 ± 0.08 | 0.96 ± 0.15         | ND                | ND             |
| BCY10918 | 0.18  | 3 | 9.2 ± 1.4      | 1.0 ± 0.2   | 1.8 ± 0.2           | 51                | 5.3            |
| BCY11027 | 0.24  | 3 | 12 ± 1         | 0.44 ± 0.02 | 0.59 ± 0.05         | 51                | 1.8            |
| BCY11385 | ND    | 3 | 8.7 ± 0.4      | 1.4 ± 0.13  | 3.6 ± 0.5           | ND                | ND             |
| BCY11863 | 0.21  | 6 | 8.5 ± 1.5      | 1.5 ± 0.2   | 3.6 ± 0.6           | 41                | 7.0            |
| BCY11864 | 0.2   | 3 | 9.8 ± 0.5      | 0.59 ± 0.08 | 0.95 ± 0.07         | 49                | 3.0            |
| BCY12377 | ND    | 3 | 7.8 ± 0.8      | 0.86 ± 0.02 | 1.7 ± 0.1           | ND                | ND             |
| BCY12484 | ND    | 3 | 11 ± 1         | 1.2 ± 0.2   | 2.1 ± 0.5           | ND                | ND             |
| BCY12485 | ND    | 3 | 13 ± 2         | 2.2 ± 0.6   | 3.1 ± 1.0           | ND                | ND             |
| BCY12587 | 0.088 | 3 | 4.5 ± 0.5      | 4.8 ± 0.5   | 17 ± 1              | 51                | 54             |
| BCY12590 | ND    | 3 | 39 ± 1         | 1.0 ± 0.3   | 0.37 ± 0.06         | ND                | ND             |

ND: Not determined, fu,p: fraction unbound (Plasma protein binding), n: no. of animals, CL: Clearance, Vdss: Volume of distribution at steady state, t $\frac{1}{2}$ : terminal half-life, CL,u: unbound clearance, Vdss,u: unbound volume of distribution

**Table S5. Mean Pharmacokinetic parameters (mean ± SD) of BCY11863 in preclinical species**

| PK parameters       | Mouse     | Rat       | NHP         |
|---------------------|-----------|-----------|-------------|
| CL (mL/min/kg)      | 16 ± 5    | 8.5 ± 1.5 | 4.0 ± 0.8   |
| Vdss (L/kg)         | 2.3 ± 0.6 | 1.5 ± 0.2 | 0.88 ± 0.23 |
| t $\frac{1}{2}$ (h) | 2.3 ± 0.4 | 3.6 ± 0.6 | 6.2 ± 2.5   |

CL: Clearance, Vdss: Volume of distribution at steady state, t $\frac{1}{2}$ : terminal half-life

**Table S6. Valency, linker/hinge and identity of the Nectin-4 and CD137 binding bicycle incorporated in the *Bicycle* TICAs**

| BCY      | Nectin-4: CD137<br><i>Bicycle</i> Valency | Linker or Hinge                 | CD137 BCY | Nectin-4<br>BCY | General Synthesis<br>Method |
|----------|-------------------------------------------|---------------------------------|-----------|-----------------|-----------------------------|
| BCY8854  | 1:1                                       | Sar10-Peg12                     | BCY7732   | BCY8846         | Method D                    |
| BCY9399  | 1:1                                       | Peg10                           | BCY7741   | BCY8116         | Synthesis described         |
| BCY9400  | 1:1                                       | Peg23                           | BCY7741   | BCY8116         | Synthesis described         |
| BCY10000 | 1:1                                       | Sar10-Peg12                     | BCY9172   | BCY8846         | Method D                    |
| BCY10569 | 1:1                                       | Sar10-Peg12                     | BCY8920   | BCY8846         | Method D                    |
| BCY10571 | 1:1                                       | Peg5                            | BCY8927   | BCY8116         | Method A                    |
| BCY10572 | 1:1                                       | Peg5                            | BCY8928   | BCY8116         | Method A                    |
| BCY10573 | 1:1                                       | Peg5                            | BCY11014  | BCY8116         | Method A                    |
| BCY10578 | 1:1                                       | Sar10                           | BCY9172   | BCY8846         | Synthesis described         |
| BCY10917 | 1:1                                       | Sar10-Peg12                     | BCY11014  | BCY8831         | Synthesis described         |
| BCY10918 | 1:2                                       | Trimesic-Peg10                  | BCY8928   | BCY11015        | Synthesis described         |
| BCY11022 | 1:3                                       | Tet-Peg10                       | BCY8928   | BCY11016        | Synthesis described         |
| BCY11027 | 1:2                                       | TCA-Peg10                       | BCY8928   | BCY11015        | Synthesis described         |
| BCY11373 | 1:1                                       | Azido acetic acid               | BCY8927   | BCY8116         | Method C                    |
| BCY11374 | 1:1                                       | Azido acetic acid               | BCY8928   | BCY8116         | Method C                    |
| BCY11375 | 1:1                                       | Azido acetic acid               | BCY11014  | BCY8116         | Method C                    |
| BCY11384 | 2:1                                       | N-(acid-Peg3)-N-bis(Peg3-azide) | BCY9172   | BCY11016        | Method B                    |
| BCY11385 | 1:2                                       | N-(acid-Peg3)-N-bis(Peg3-azide) | BCY11014  | BCY8116         | Method B                    |
| BCY11616 | 1:1                                       | Peg5                            | BCY7744   | BCY8116         | Method A                    |
| BCY11858 | 1:1                                       | Peg5                            | BCY8928   | BCY11414        | Method A                    |
| BCY11863 | 1:2                                       | N-(acid-Peg3)-N-bis(Peg3-azide) | BCY8928   | BCY8116         | Method B                    |
| BCY11864 | 1:2                                       | N-(acid-Peg3)-N-bis(Peg3-azide) | BCY7744   | BCY8116         | Method B                    |
| BCY12238 | 1:1                                       | Peg5                            | BCY8928   | BCY12024        | Method A                    |
| BCY12377 | 1:1                                       | Peg5                            | BCY12143  | BCY8116         | Method A                    |
| BCY12378 | 1:1                                       | Peg5                            | BCY12147  | BCY8116         | Method A                    |
| BCY12379 | 1:1                                       | Peg5                            | BCY12149  | BCY8116         | Method A                    |
| BCY12481 | 1:1                                       | Peg5                            | BCY12145  | BCY8116         | Method A                    |
| BCY12484 | 1:2                                       | N-(acid-Peg3)-N-bis(Peg3-azide) | BCY12143  | BCY8116         | Method B                    |
| BCY12485 | 1:2                                       | N-(acid-Peg3)-N-bis(Peg3-azide) | BCY12149  | BCY8116         | Method B                    |
| BCY12486 | 1:2                                       | N-(acid-Peg3)-N-bis(Peg3-azide) | BCY12147  | BCY8116         | Method B                    |
| BCY12487 | 1:2                                       | N-(acid-Peg3)-N-bis(Peg3-azide) | BCY12145  | BCY8116         | Method B                    |
| BCY12572 | 1:1                                       | Peg5                            | BCY12352  | BCY8116         | Method A                    |
| BCY12573 | 1:1                                       | Peg5                            | BCY12353  | BCY8116         | Method A                    |
| BCY12574 | 1:1                                       | Peg5                            | BCY12354  | BCY8116         | Method A                    |
| BCY12576 | 1:1                                       | Peg5                            | BCY8928   | BCY12363        | Method A                    |
| BCY12579 | 1:1                                       | Peg5                            | BCY8928   | BCY12366        | Method A                    |
| BCY12580 | 1:1                                       | Peg5                            | BCY8928   | BCY12367        | Method A                    |
| BCY12581 | 1:1                                       | Peg5                            | BCY8928   | BCY12368        | Method A                    |
| BCY12582 | 1:1                                       | Peg5                            | BCY8928   | BCY12369        | Method A                    |
| BCY12583 | 1:1                                       | Peg5                            | BCY8928   | BCY12370        | Method A                    |
| BCY12586 | 1:2                                       | N-(acid-Peg3)-N-bis(Peg3-azide) | BCY12352  | BCY8116         | Method B                    |
| BCY12587 | 1:2                                       | N-(acid-Peg3)-N-bis(Peg3-azide) | BCY12353  | BCY8116         | Method B                    |
| BCY12588 | 1:2                                       | N-(acid-Peg3)-N-bis(Peg3-azide) | BCY12354  | BCY8116         | Method B                    |
| BCY12709 | 1:1                                       | Peg5                            | BCY12381  | BCY8116         | Method A                    |
| BCY12710 | 1:1                                       | Peg5                            | BCY12382  | BCY8116         | Method A                    |
| BCY12760 | 1:2                                       | N-(acid-Peg3)-N-bis(Peg3-azide) | BCY12381  | BCY8116         | Method B                    |
| BCY12761 | 1:2                                       | N-(acid-Peg3)-N-bis(Peg3-azide) | BCY12382  | BCY8116         | Method B                    |
| BCY12797 | 1:2                                       | N-(acid-Peg3)-N-bis(Peg3-azide) | BCY11506  | BCY8116         | Method B                    |
| BCY12970 | 2:2                                       | Hinge 4 (Fig. 4)                | BCY8928   | BCY11016        | Synthesis described         |
| BCY13144 | 1:2                                       | N-(acid-Peg3)-N-bis(Peg3-azide) | BCY8928   | BCY11415        | Method B                    |

**Table S7. Peptide sequence and resin used for solid phase synthesis of Nectin-4 and CD137 Bicycles incorporated into Bicycle TICAs. Attachment points to linkers are highlighted in bold.**

| BCY      | Peptide Sequence, 1,3,5-Triacryloylhexahydro-1,3,5-triazine (TATA) cyclized                  | Target   | Resin type              |
|----------|----------------------------------------------------------------------------------------------|----------|-------------------------|
| BCY7732  | [Ac]ACIEEGQYCFADPY[Nle]C[ <b>Dap</b> ][CONH2]                                                | CD137    | Rink amide              |
| BCY7741  | [Ac]ACIEEGQYCFADPY[Nle]C[ <b>Dap(PYA)</b> ][CONH2]                                           | CD137    | Rink amide              |
| BCY7744  | [Ac]ACIEE[ <b>dK(PYA)</b> ]QYCFADPY[Nle]CA[CONH2]                                            | CD137    | Rink amide              |
| BCY8116  | <b>NH2</b> -CP[1Nal][dD]CM[HArg]DWSTP[HyP]WC[CONH2]                                          | Nectin-4 | Rink amide              |
| BCY8831  | [Ac]CP[1Nal][ <b>dK(Sar10-B-Ala)</b> ]CM[HArg]DWSTP[HyP]WC[CONH2]                            | Nectin-4 | Rink amide              |
| BCY8846  | [ <b>PYA</b> ][B-Ala][Sar10]CP[1Nal][dD]CM[HArg]DWSTP[HyP]WC[CONH2]                          | Nectin-4 | Rink amide              |
| BCY8920  | [Ac]C[tBuAla]PE[ <b>dK</b> ]PYCFADPY[Nle]CA[CONH2]                                           | CD137    | Rink amide              |
| BCY8927  | [Ac]C[tBuAla]PK[ <b>PYA</b> ][dA]PYCFADPY[Nle]CA[CONH2]                                      | CD137    | Rink amide              |
| BCY8928  | [Ac]C[tBuAla]PE[ <b>dK(PYA)</b> ]PYCFADPY[Nle]CA[CONH2]                                      | CD137    | Rink amide              |
| BCY9172  | [Ac]C[tBuAla]PE[dA]PYCFADPY[Nle]C[ <b>Dap</b> ][CONH2]                                       | CD137    | Rink amide              |
| BCY11014 | [Ac]C[tBuAla]PE[dA]PYCFADPY[Nle]C[ <b>Dap(PYA)</b> ][CONH2]                                  | CD137    | Rink amide              |
| BCY11015 | [ <b>PYA</b> ]CP[1Nal][dD]CM[HArg]DWSTP[HyP]WC[CONH2]                                        | Nectin-4 | Rink amide              |
| BCY11016 | [ <b>PYA</b> ][B-Ala]CP[1Nal][dD]CM[HArg]DWSTP[HyP]WC[CONH2]                                 | Nectin-4 | Rink amide              |
| BCY11414 | <b>NH2</b> -CPFGCM[HArg]DWSTP[HyP]WC[CONH2]                                                  | Nectin-4 | Rink amide              |
| BCY11415 | <b>NH2</b> -CP[1Nal][dD]CM[HArg]D[dW]STP[HyP][dW]C[CONH2]                                    | Nectin-4 | Rink amide              |
| BCY11506 | [Ac][dA][dC][di][dE][dE] <b>K(PYA)</b> [dQ][dY][dC][dF][dA][dD][dP][dY][dNle][dC][dA][CONH2] | CD137    | Rink amide              |
| BCY12024 | [Ac]CP[1Nal][ <b>dK</b> ]CM[HArg]DWSTP[HyP]WC[CONH2]                                         | Nectin-4 | Rink amide              |
| BCY12143 | [Ac]C[tBuAla]EE[ <b>dK(PYA)</b> ]PYCFADPY[Nle]C[CONH2]                                       | CD137    | Rink amide              |
| BCY12145 | [Ac]C[tBuAla]PE[ <b>dK(PYA)</b> ]PYCFAEPY[Nle]C[CONH2]                                       | CD137    | Rink amide              |
| BCY12147 | [Ac]C[tBuAla]PE[ <b>dK(PYA)</b> ]PYCFANPY[Nle]C[CONH2]                                       | CD137    | Rink amide              |
| BCY12149 | [Ac]C[tBuAla]PE[ <b>dK(PYA)</b> ]PYCFADPY[Nle]C[CONH2]                                       | CD137    | Rink amide              |
| BCY12352 | [Ac]C[tBuAla]PE[ <b>dK(PYA)</b> ]PYCFADPY[Nle][Cysam]                                        | CD137    | Cysteamine 2-chlorotryl |
| BCY12353 | [MerPro][tBuAla]PE[ <b>dK(PYA)</b> ]PYCFADPY[Nle]C[CONH2]                                    | CD137    | Rink amide              |
| BCY12354 | [MerPro][tBuAla]PE[ <b>dK(PYA)</b> ]PYCFADPY[Nle][Cysam]                                     | CD137    | Cysteamine 2-chlorotryl |
| BCY12363 | [MerPro]P[1Nal][ <b>dK</b> ]CM[HArg]DWSTP[HyP]WC[CONH2]                                      | Nectin-4 | Rink amide              |
| BCY12366 | [Ac]CP[1Nal][ <b>dK</b> ]CM[HArg]HWSTP[HyP]WC[CONH2]                                         | Nectin-4 | Rink amide              |
| BCY12367 | [Ac]CP[1Nal][ <b>dK</b> ]CM[HArg]EWSTP[HyP]WC[CONH2]                                         | Nectin-4 | Rink amide              |
| BCY12368 | <b>NH2</b> -CP[1Nal][dE]CM[HArg]DWSTP[HyP]WC[CONH2]                                          | Nectin-4 | Rink amide              |
| BCY12369 | <b>NH2</b> -CP[1Nal][dA]CM[HArg]DWSTP[HyP]WC[CONH2]                                          | Nectin-4 | Rink amide              |
| BCY12370 | <b>NH2</b> -CP[1Nal][dE]CL[HArg]DWSTP[HyP]WC[CONH2]                                          | Nectin-4 | Rink amide              |
| BCY12381 | [Ac]C[tBuAla]PE[ <b>dK(PYA)</b> ]PYCFAD[NMeAla]Y[Nle]C[CONH2]                                | CD137    | Rink amide              |
| BCY12382 | [Ac]C[tBuAla]PE[ <b>dK(PYA)</b> ]PYCFAD[NMeDAla]Y[Nle]C[CONH2]                               | CD137    | Rink amide              |

Ac = Acetyl, Nle = L-Norleucine, Dap = L-2,3-diaminopropionic acid, PYA = 4-pentynoic acid, CONH2 = C-terminal amide, 1-Nal = 3-(1-naphthyl)-L-alanine, HArg = L-homoarginine, [Hyp] = trans-4-Hydroxy-L-proline, Sar10-B-Ala = 10 X sarcosine followed by beta alanine, B-Ala = Beta Alanine, tBuAla = t-butyl-L-alanine, Cysam = Cysteamine, MerPro = 3-mercaptopropanoic acid, dX = D-version of X amino acid, NMeAla = N-methyl-L-Alanine, NMeDAla = N-methyl-D-Alanine;NH2: free-N-terminal, (X) are prosthetic groups attached to side chain of the preceding amino acid. Amino acids highlighted in **Bold** indicate attachment points to the linkers.

**Table S8. %Purity and m/z of *Bicycle* TICAs determined by HPLC (by batch) and MS**

| BCY      | Calc. MW | Observed m/z                    | MS Detector | % HPLC Purity(batch)                     |
|----------|----------|---------------------------------|-------------|------------------------------------------|
| BCY8854  | 5861.59  | 1173.3086,1466.3883,1954.8512   | Q-TOF       | 95.3% (1), 95.9%(2)                      |
| BCY9399  | 5006.64  | 1002.3                          | Triple Quad | 96.3% (1)                                |
| BCY9400  | 5579.33  | 1395.6175,1860.8205,2790.7182   | Q-TOF       | 93.6% (1)                                |
| BCY10000 | 5755.55  | 1152.1068, 1439.8863, 1919.5150 | Q-TOF       | >98%(1), 95.0%(2)                        |
| BCY10569 | 5797.62  | 1160.7                          | Triple Quad | 96.2% (1)                                |
| BCY10571 | 4649.36  | 1163.5                          | Triple Quad | 96.5% (1)                                |
| BCY10572 | 4707.4   | 1570.0200, 2354.5282            | Q-TOF       | >95%(1,2,3,4,6), 93.2%(5)                |
| BCY10573 | 4665.32  | 1555.9896,2333.4830             | Q-TOF       | >98% (1), 96.5(2)                        |
| BCY10578 | 5212.88  | 1304.0578, 1738.4109, 2607.6107 | Q-TOF       | 96.2% (1)                                |
| BCY10917 | 5810.66  | 1163.1247, 1453.6590, 1937.8783 | Q-TOF       | 97.5% (1), 97.6(2)                       |
| BCY10918 | 8423.67  | 1404.9618,1685.5564,2106.9487   | Q-TOF       | 94.4% (1), 97.7%(2), 96.7%(3), 96.0%(4)  |
| BCY11022 | 11435.22 | 1634.5985, 1906.8628, 2288.0332 | Q-TOF       | 94.7% (1),91.3% (2)                      |
| BCY11027 | 8578.93  | 1430.8253, 1716.7918, 2145.7439 | Q-TOF       | 95.9% (1), 93.5% (2)                     |
| BCY11373 | 4415.08  | 1472.2                          | Triple Quad | 92.4% (1)                                |
| BCY11374 | 4473.12  | 1491.5                          | Triple Quad | 92.0% (1)                                |
| BCY11375 | 4431.04  | 1477.9                          | Triple Quad | 96.8% (1)                                |
| BCY11384 | 7348.4   | 1470.6174, 1838.0274, 2450.3695 | Q-TOF       | <b>87%* (1)</b> >90% purity not achieved |
| BCY11385 | 7129.18  | 1426.6269, 1783.2849, 2377.3764 | Q-TOF       | 94% (1), 93.4% (2)                       |
| BCY11616 | 4827.47  | 1207.7584, 1610.0085, 2414.5036 | Q-TOF       | 93.98% (1), 95.9% (2), 95.1%(3)          |
| BCY11858 | 4599.31  | 1534.0000,2300.4983             | Q-TOF       | 96.8% (1), >98% (2)                      |
| BCY11863 | 7213.34  | 1443.6375, 1804.2959, 2405.3879 | Q-TOF       | 44 batches, all in-vivo batches >95%     |
| BCY11864 | 7453.46  | 1491.6404, 1864.3041, 2485.4050 | Q-TOF       | 89.2% (1), 92.3% (2), 95.6%(3)           |
| BCY12238 | 4763.51  | 1588.3683, 2382.0505            | Q-TOF       | 96.7% (1)                                |
| BCY12377 | 4668.33  | 1168                            | Triple Quad | 95.3% (1)                                |
| BCY12378 | 4635.35  | 1546.6                          | Triple Quad | 92.9% (1)                                |
| BCY12379 | 4636.33  | 1159.8                          | Triple Quad | 91.5% (1), 95.5% (2)                     |
| BCY12481 | 4650.36  | 1550.9960, 2325.9929            | Q-TOF       | 96.0% (1)                                |
| BCY12484 | 7135.17  | 1427.8198,1784.7698             | Q-TOF       | 92.8% (1), 97.5% (2)                     |
| BCY12485 | 7071.18  | 1768.7                          | Triple Quad | 92.0% (1), 95.6% (2)                     |
| BCY12486 | 7069.21  | 1768.2                          | Triple Quad | 91.8% (1), 96.2% (2)                     |
| BCY12487 | 7099.23  | 1420.7882, 1775.7363, 2367.3136 | Q-TOF       | 93.4% (1), 97.0% (2), 96.4%(3)           |
| BCY12587 | 6957.08  | 1739.9936, 2319.6563            | Q-TOF       | 90.1% (1), 90.9% (2)                     |
| BCY12588 | 6871.03  | 1718.7780, 2291.3712            | Q-TOF       | 95.7% (1)                                |
| BCY12709 | 4624.32  | 1156.9935, 1542.3257, 2312.9870 | Q-TOF       | 95.6% (1)                                |
| BCY12710 | 4624.32  | 1156.9956, 1542.3293, 2312.9922 | Q-TOF       | 95.1% (1), >98% (2)                      |
| BCY12760 | 7047.16  | 1410.4137, 1762.7710, 2350.0283 | Q-TOF       | >98% (1)                                 |
| BCY12761 | 7047.16  | 1410.2147, 1762.7707, 2350.0280 | Q-TOF       | 94.8% (1)                                |
| BCY12970 | 10605.21 | 1515.9639, 1768.4578, 2121.9416 | Q-TOF       | 92.5% (1)                                |
| BCY12797 | 7453.46  | 1491.6407, 1864.3017            | Q-TOF       | 93.7% (1)                                |
| BCY12572 | 4593.31  | 1531.9920, 2297.4872            | Q-TOF       | 97.3% (1)                                |
| BCY12573 | 4579.28  | 1527.3339, 2290.4998            | Q-TOF       | 93.1% (1)                                |
| BCY12574 | 4536.25  | 1512.9840, 2268.9751            | Q-TOF       | 94.0% (1)                                |
| BCY12576 | 4705.48  | 1569.3574, 2353.5350            | Q-TOF       | 96.1% (1)                                |
| BCY12579 | 4784.58  | 1197.0372, 1595.7101            | Q-TOF       | 91.5% (1),95.4% (2)                      |
| BCY12580 | 4776.56  | 1593.0535, 2389.0783            | Q-TOF       | 96.5% (1)                                |
| BCY12581 | 4721.43  | 1181.2591, 1574.6800, 2361.5188 | Q-TOF       | 93.6% (1)                                |
| BCY12582 | 4663.40  | 1166.7583, 1555.3457, 2332.5169 | Q-TOF       | 92.0% (1)                                |
| BCY12583 | 4703.40  | 1176.7663, 1568.6894, 2352.5324 | Q-TOF       | 92.4% (1)                                |
| BCY12586 | 6985.13  | 1397.8123, 1747.2672, 2329.3580 | Q-TOF       | 95.1% (1)                                |
| BCY13144 | 7213.34  | 1443.6338, 1804.2928, 2405.3817 | Q-TOF       | 92.8% (1)                                |

# HPLC traces of Bicycle TICAs used in in-vivo studies

BCY10000

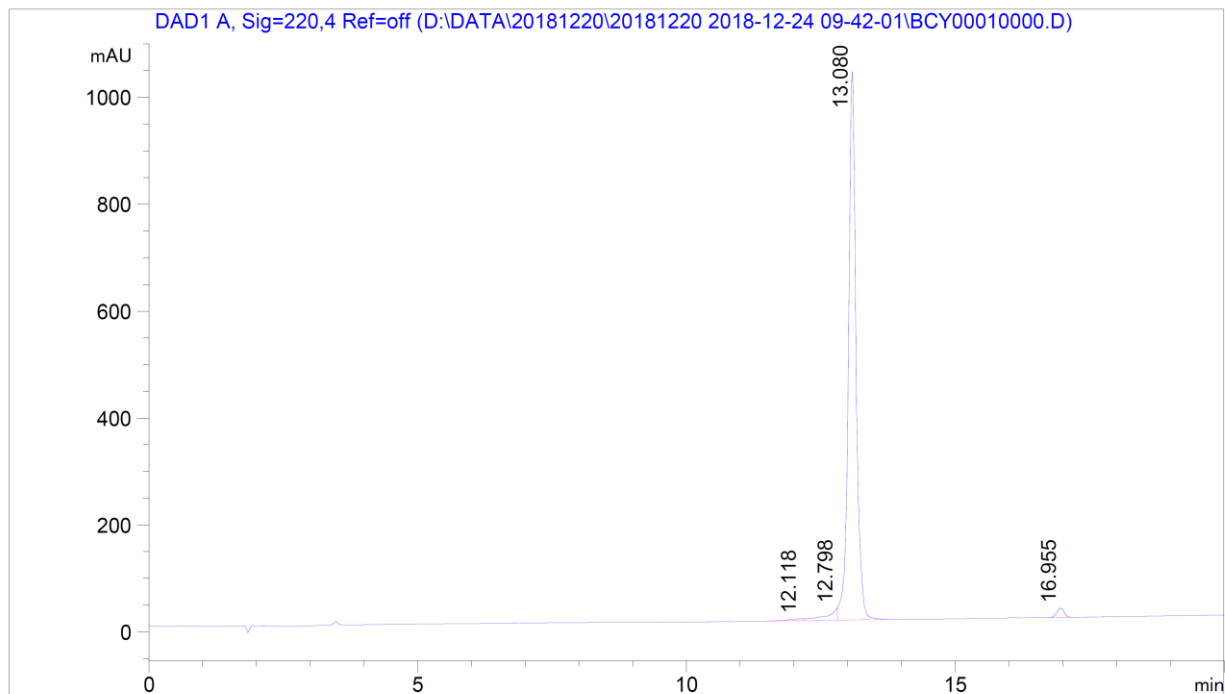

BCY10572

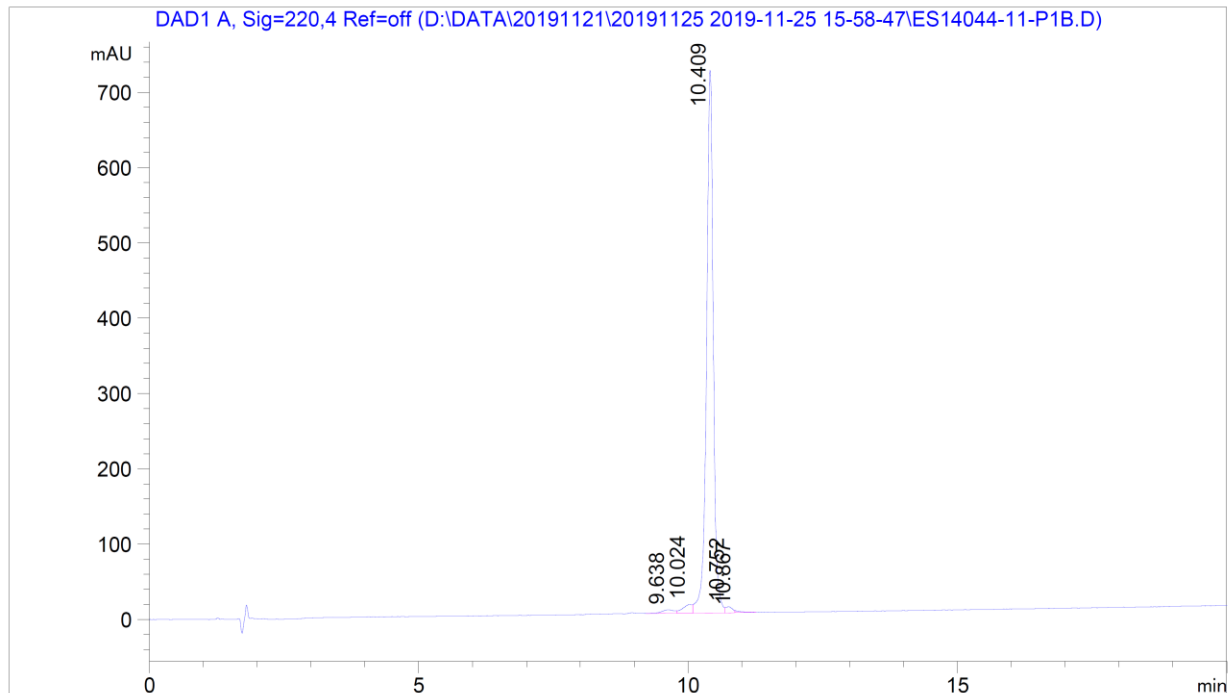

BCY10573

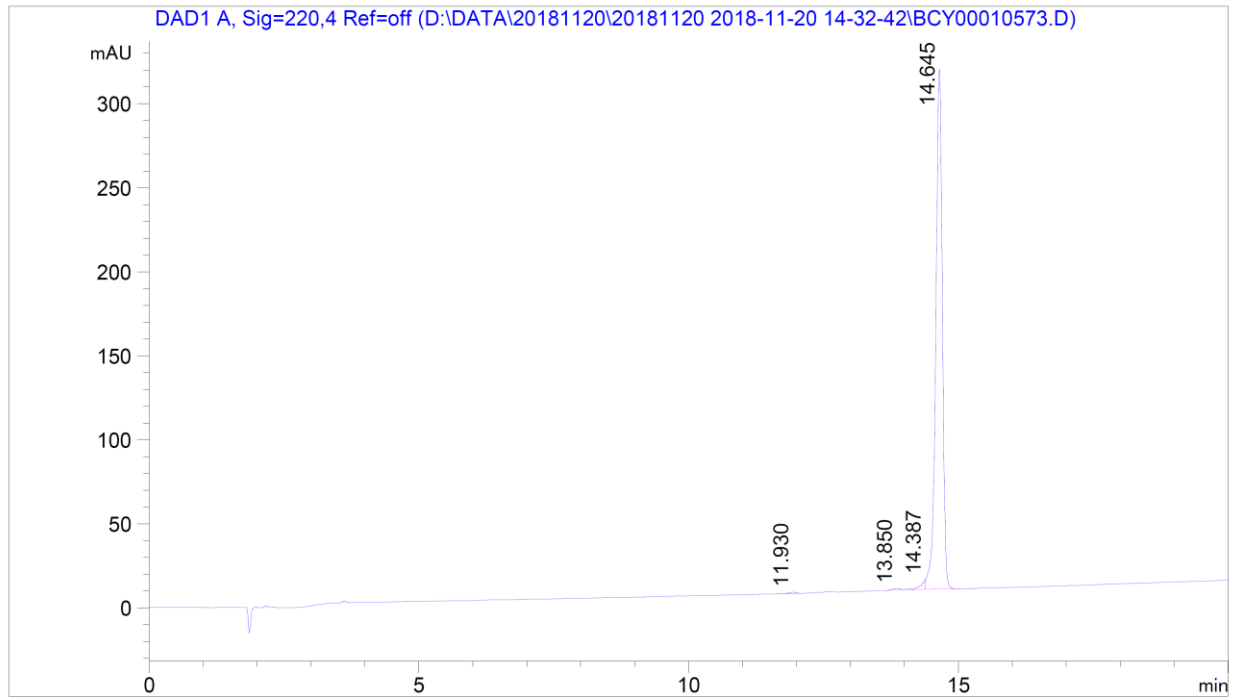

BCY11863

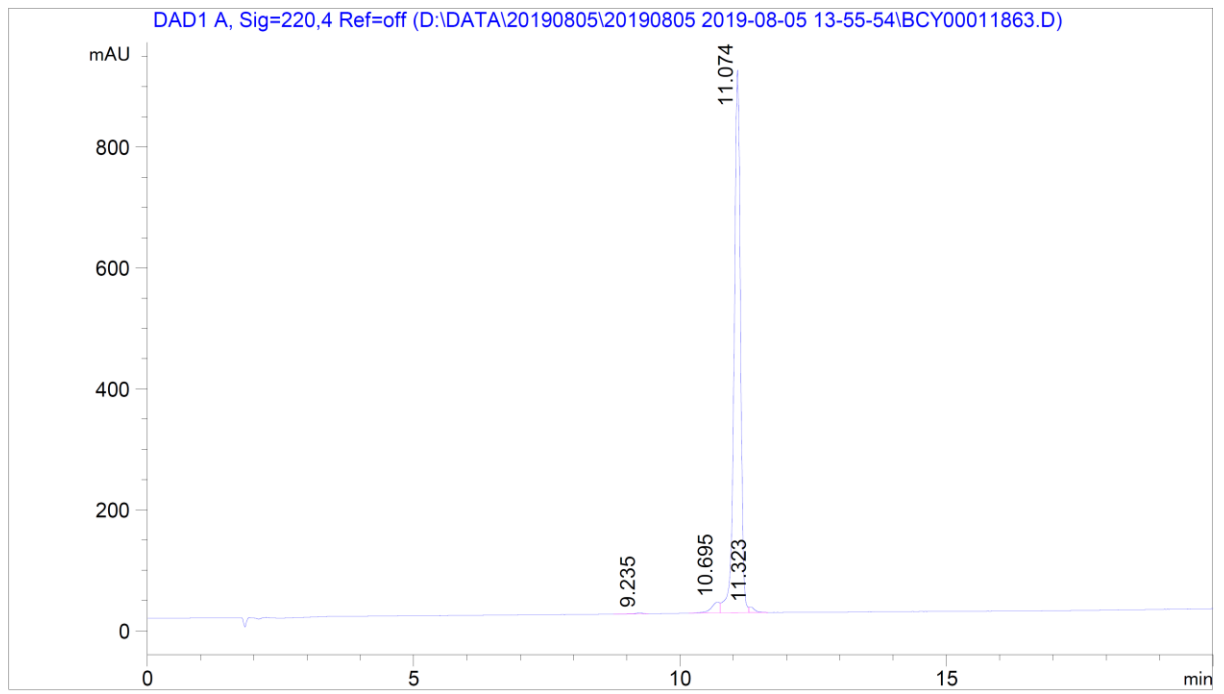



BCY11864

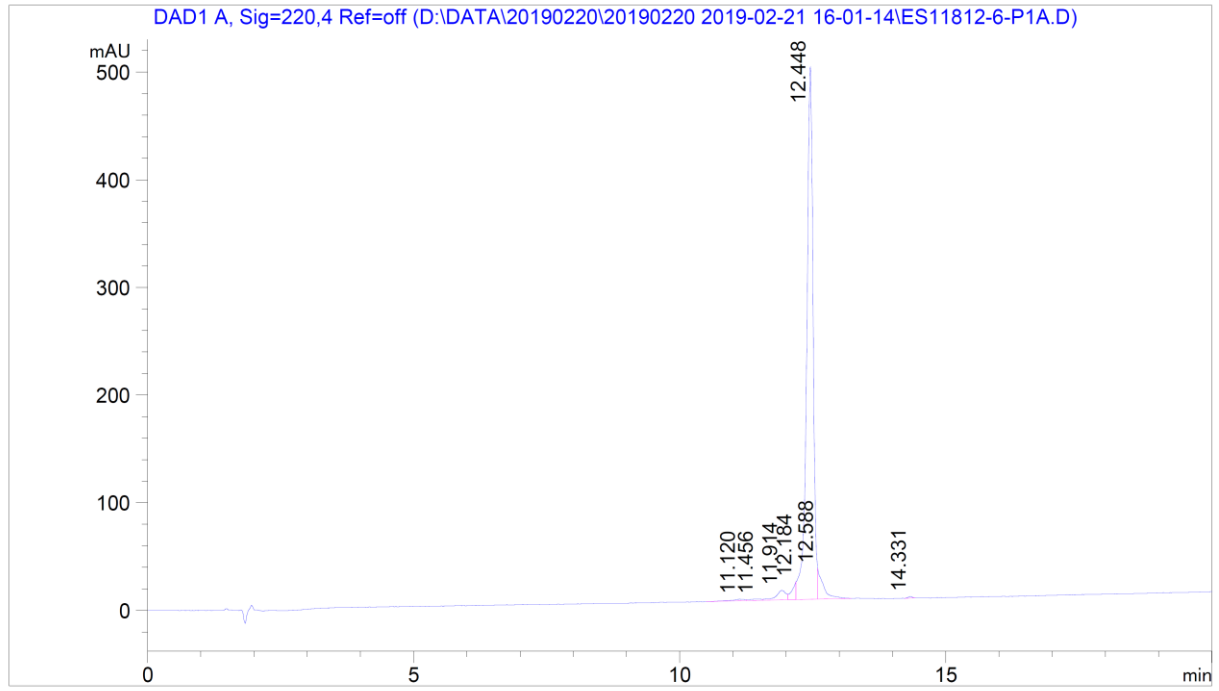

BCY10918

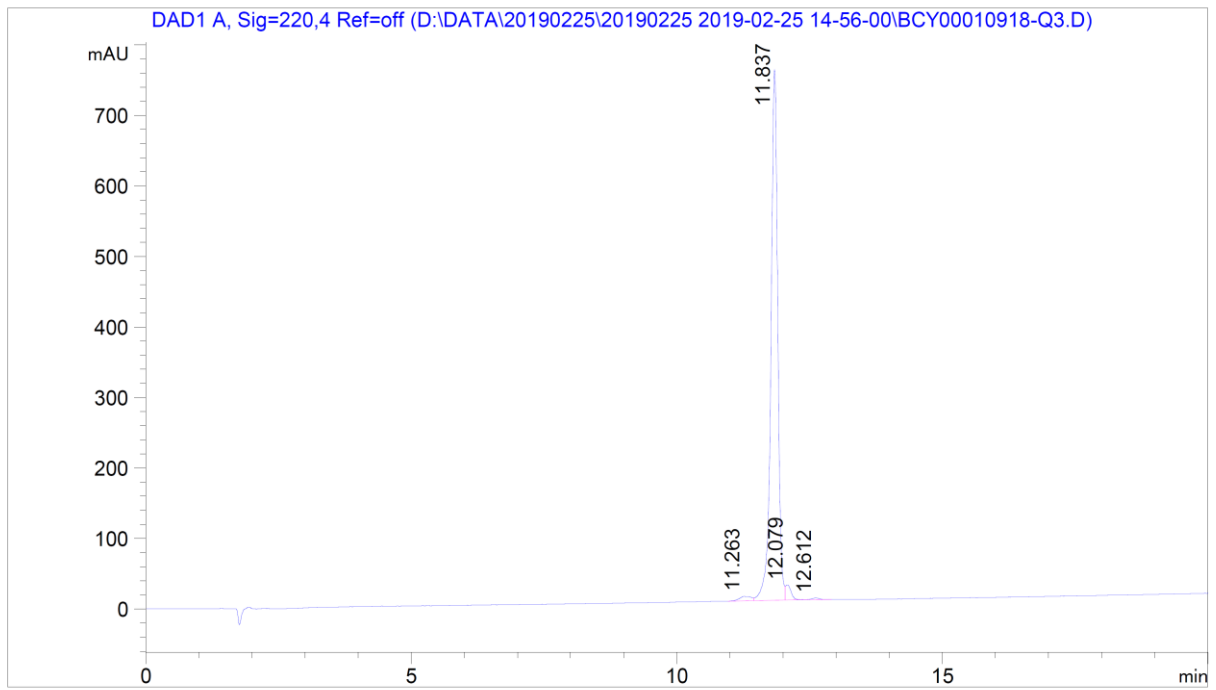

BCY11027

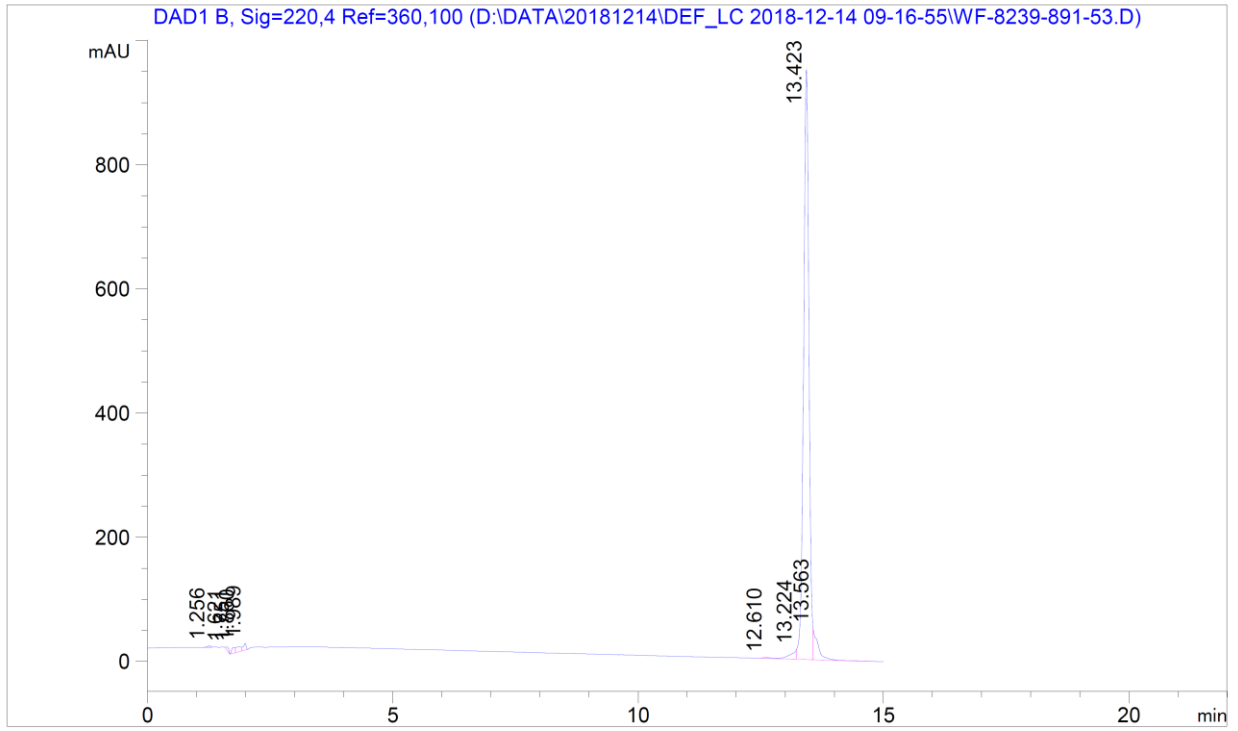

BCY11385

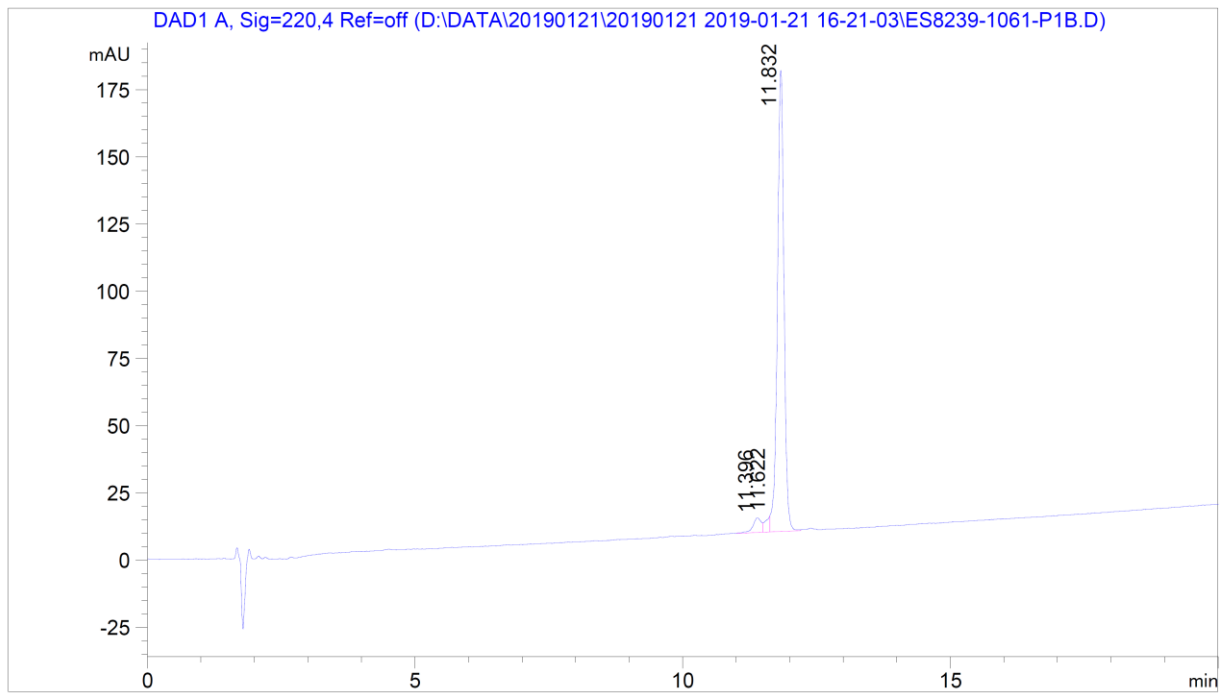

BCY12377

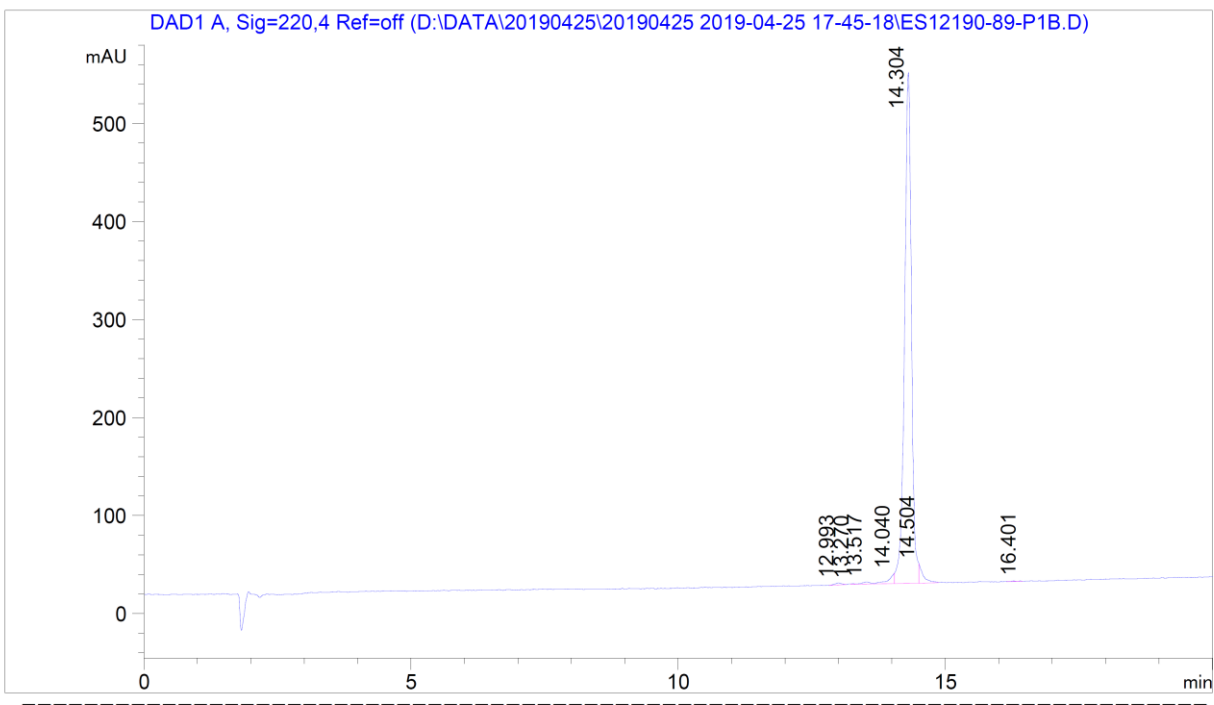

BCY12484

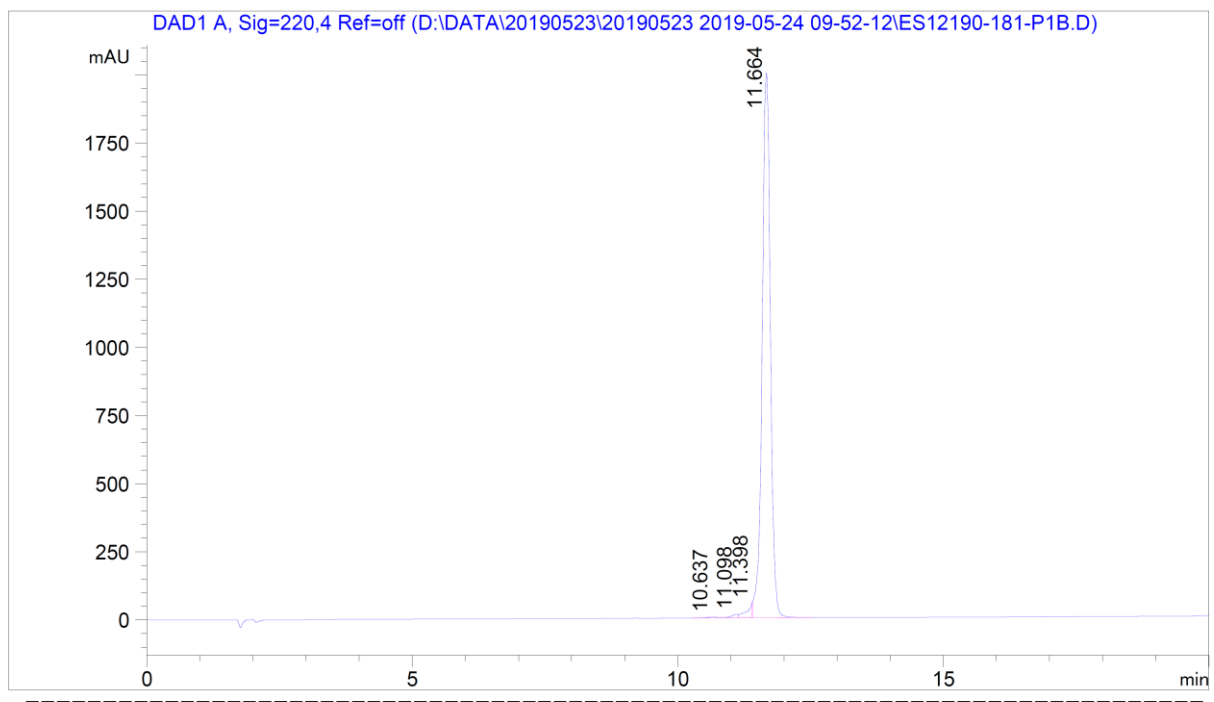

BCY12485

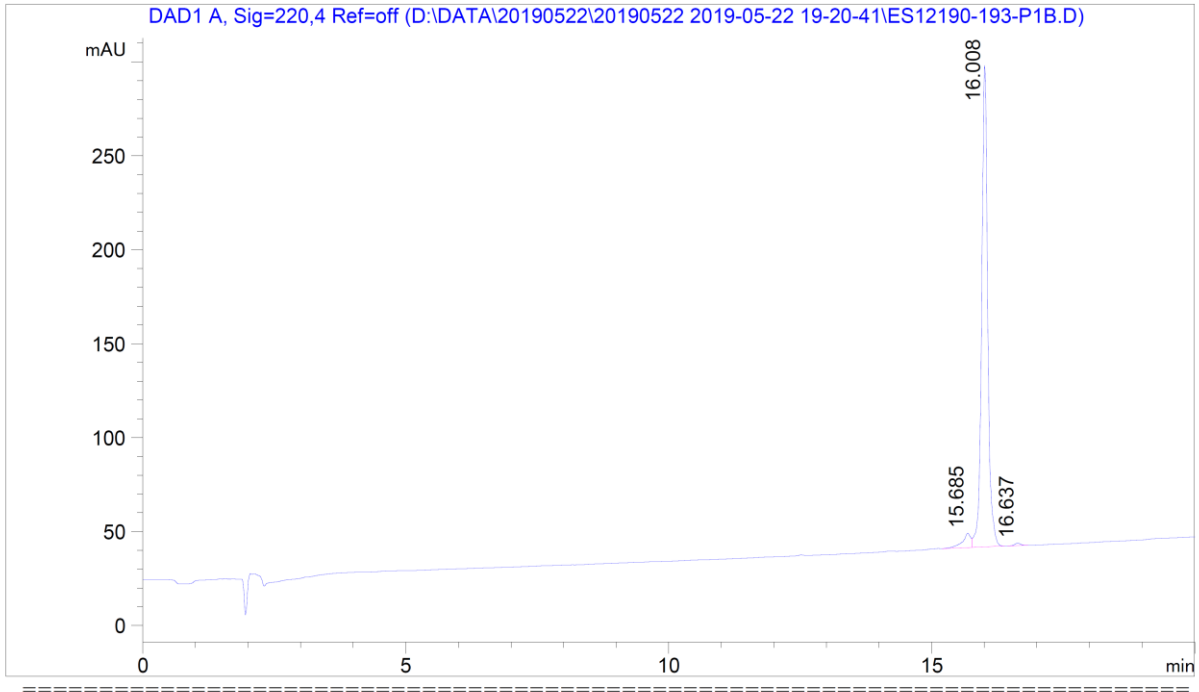

BCY12587

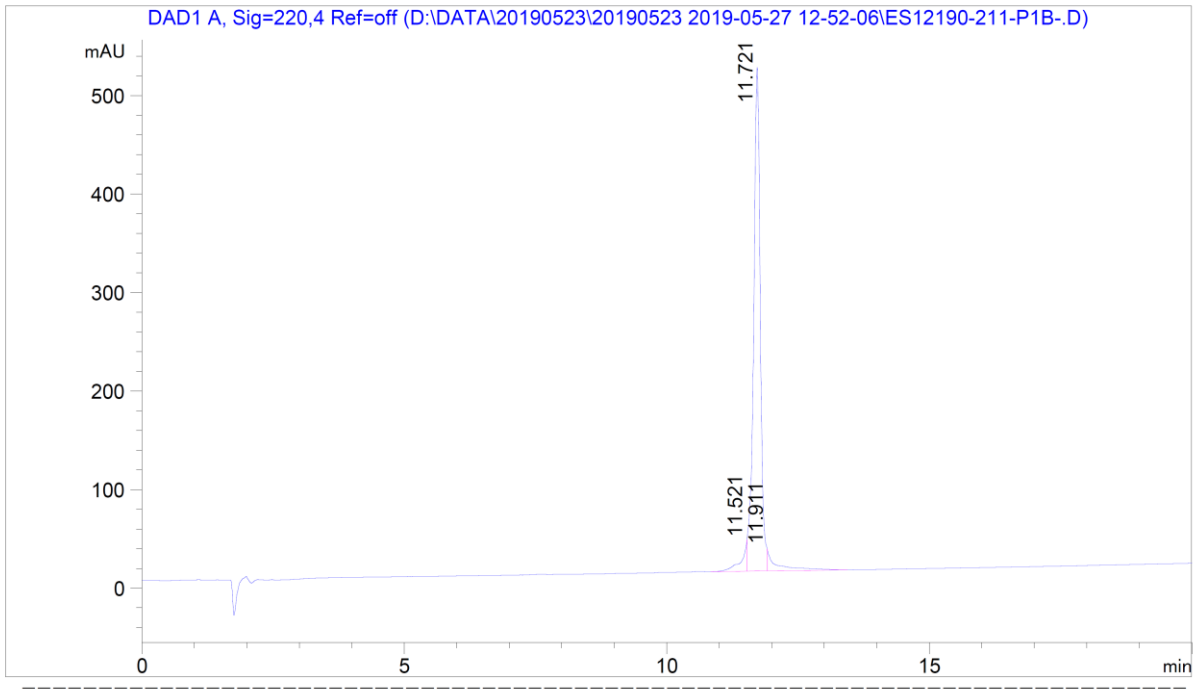

Area Percent Report

BCY12590

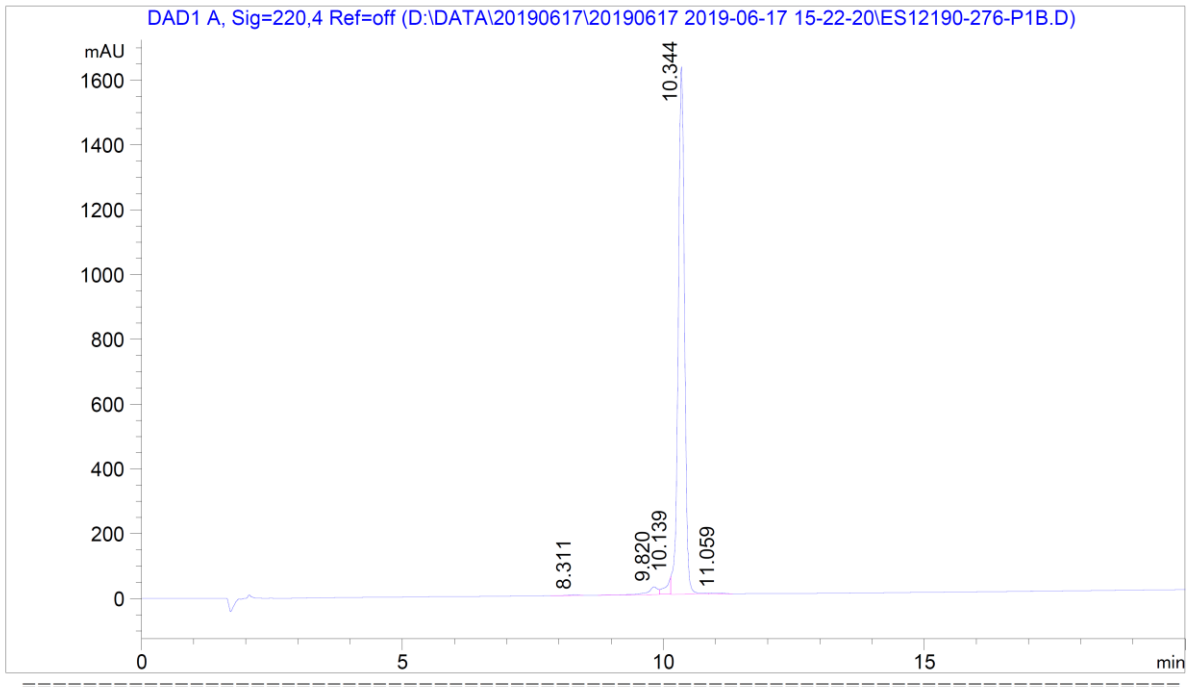

## Structure of *Bicycle* TICAs

### BCY8854

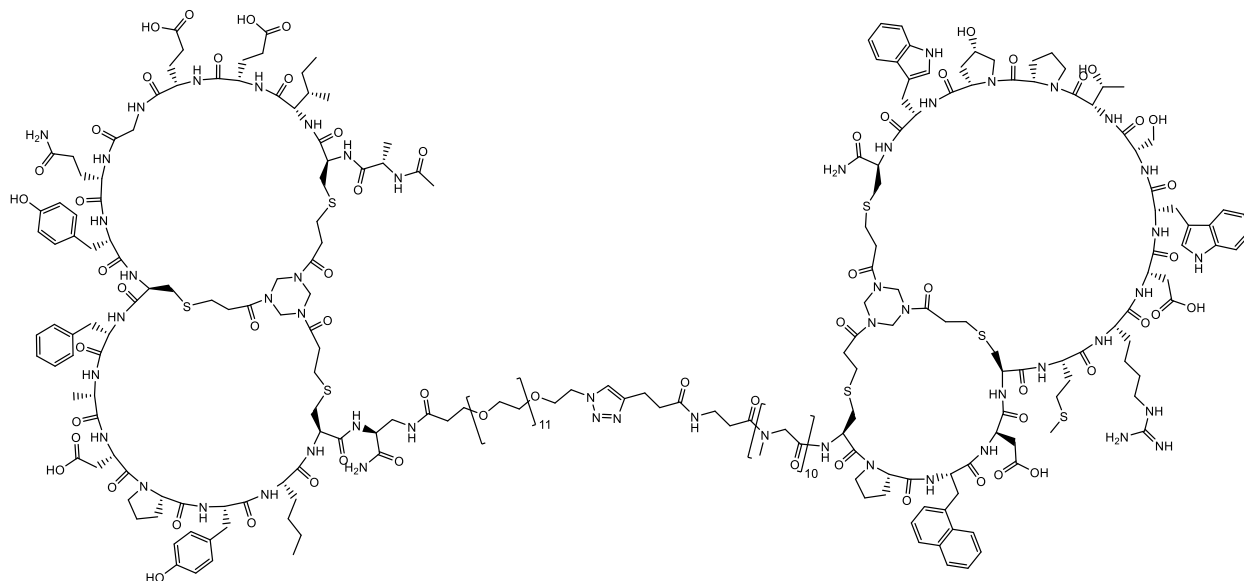

### BCY9399

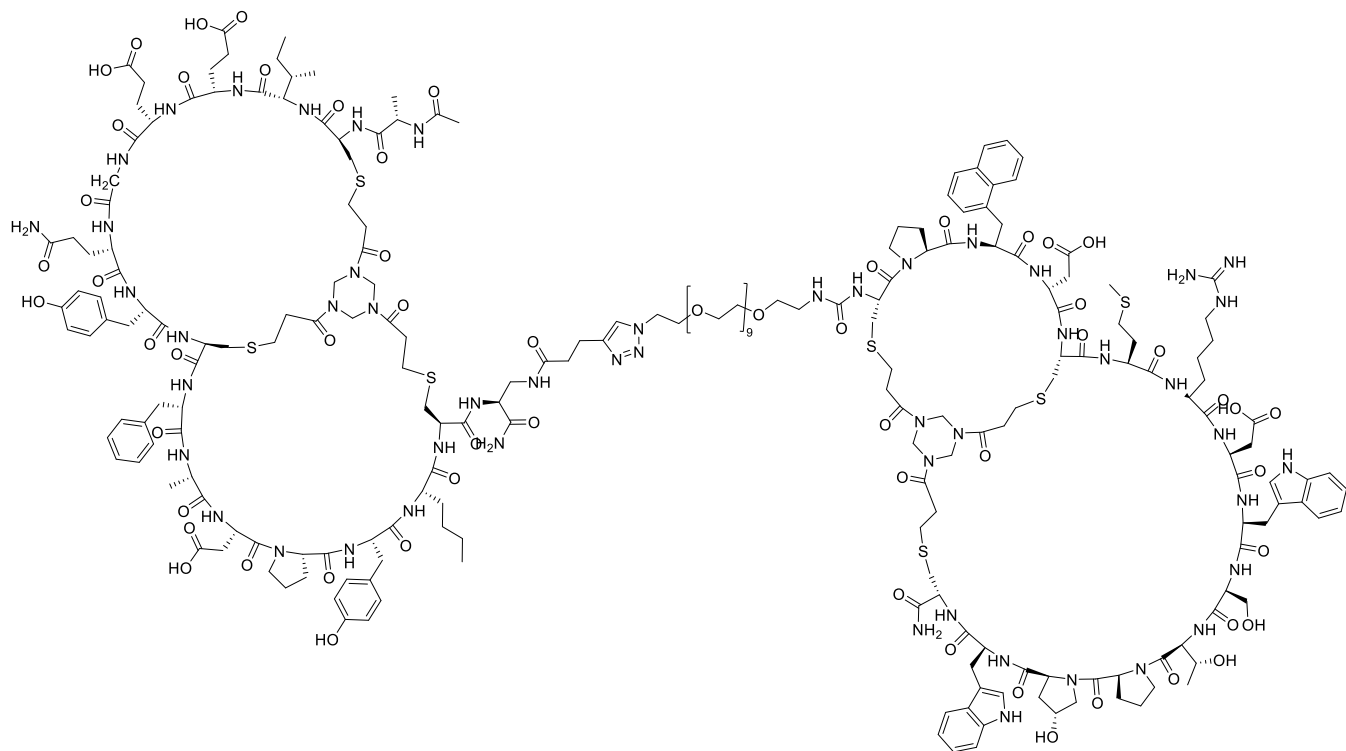

**BCY9400**

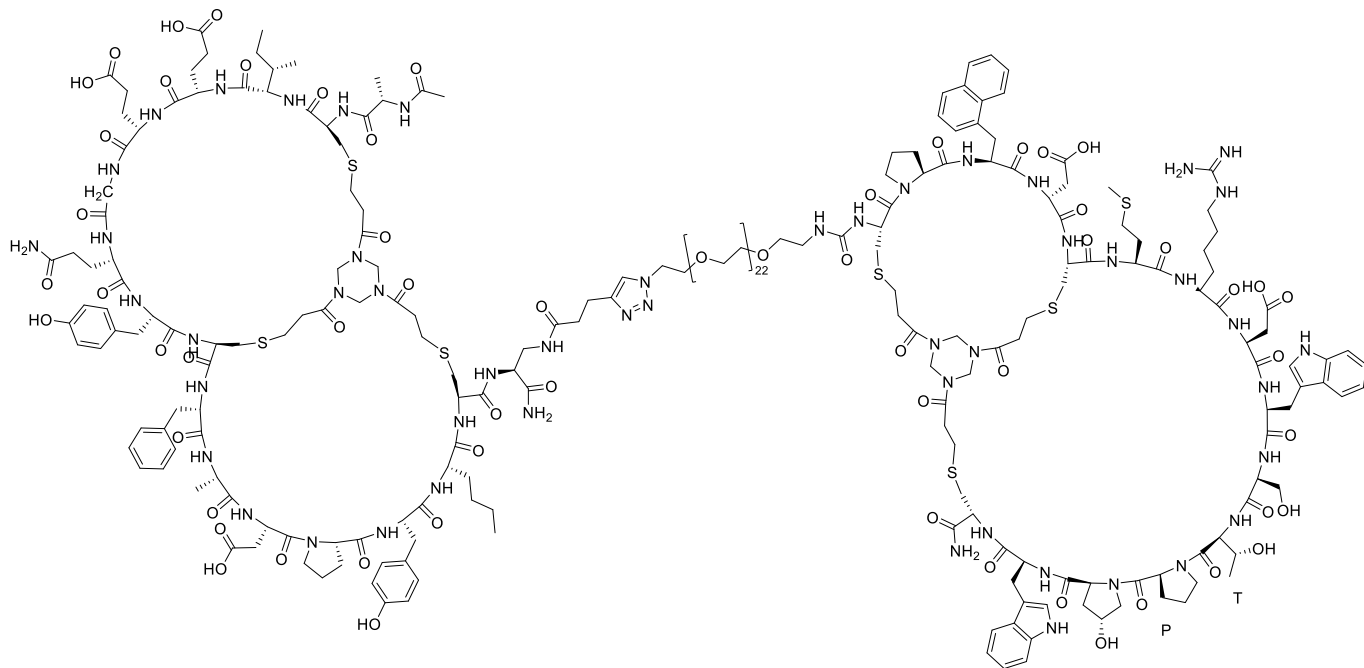

**BCY10000**

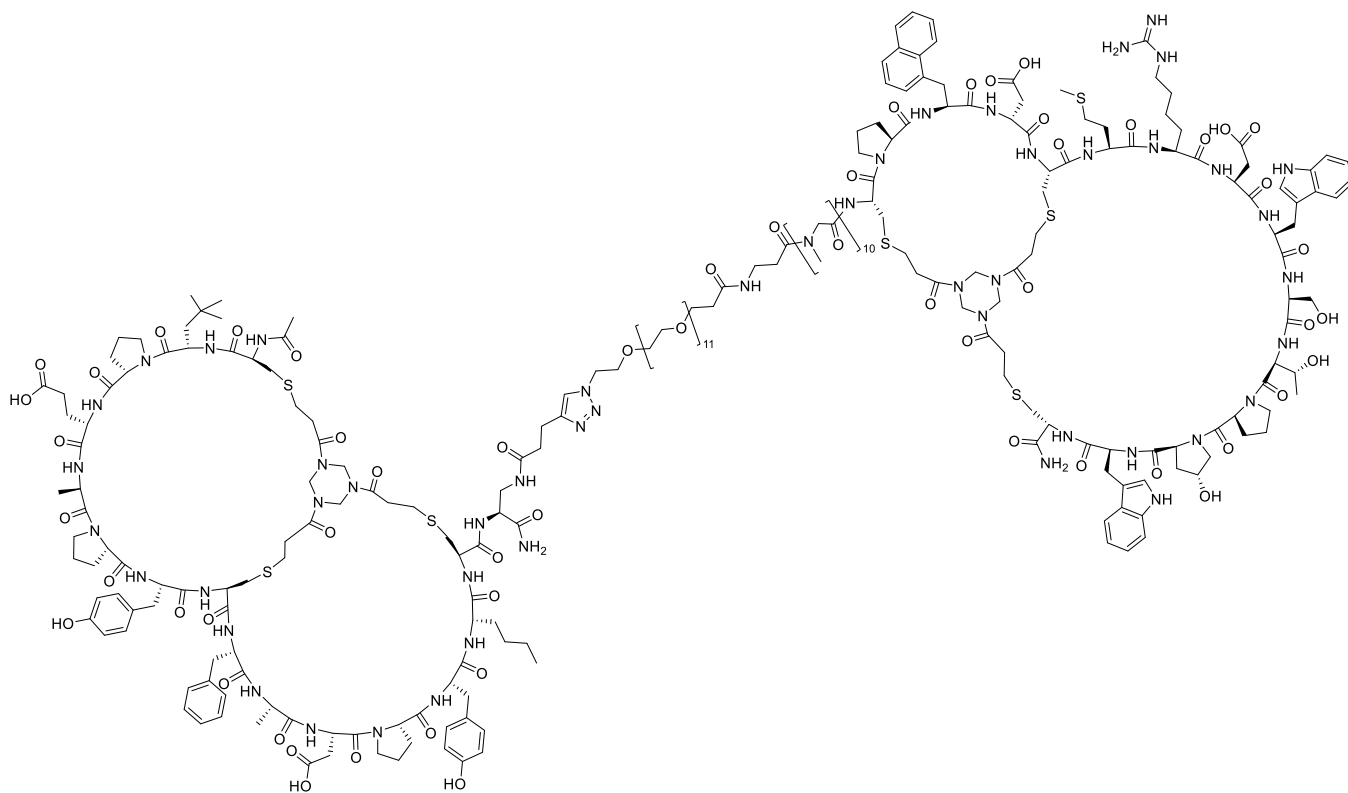

# BCY10569

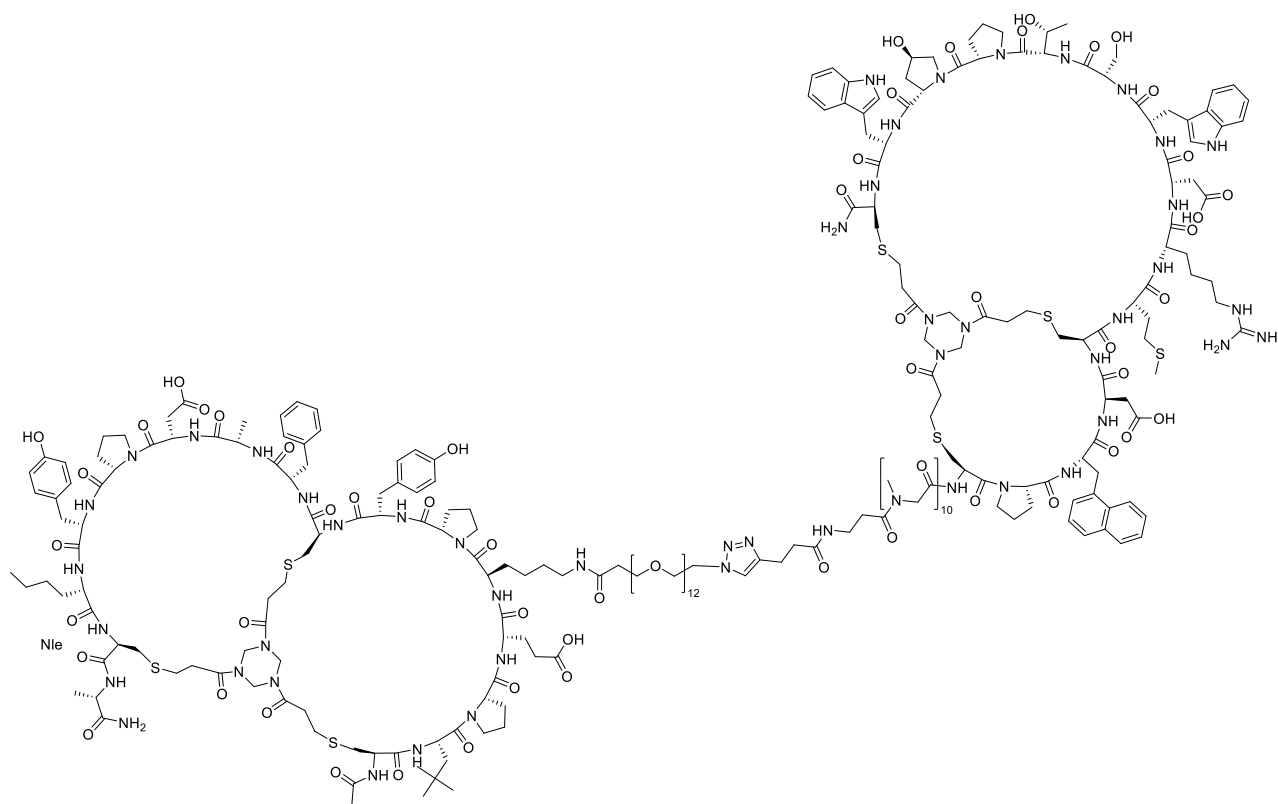

# BCY10571

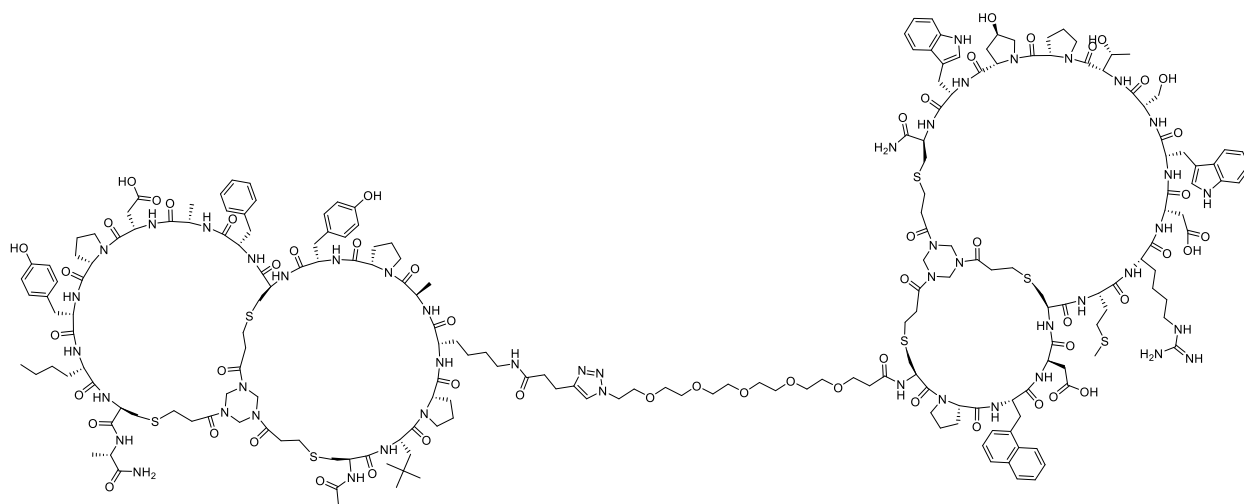



**BCY10572**

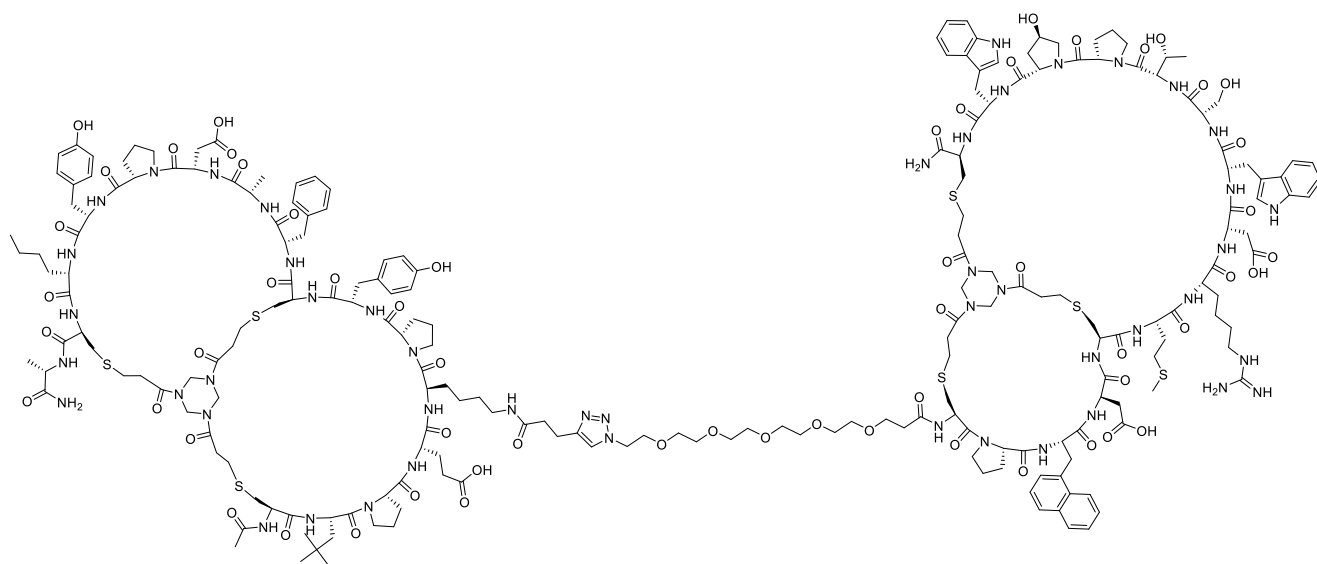

**BCY10573**

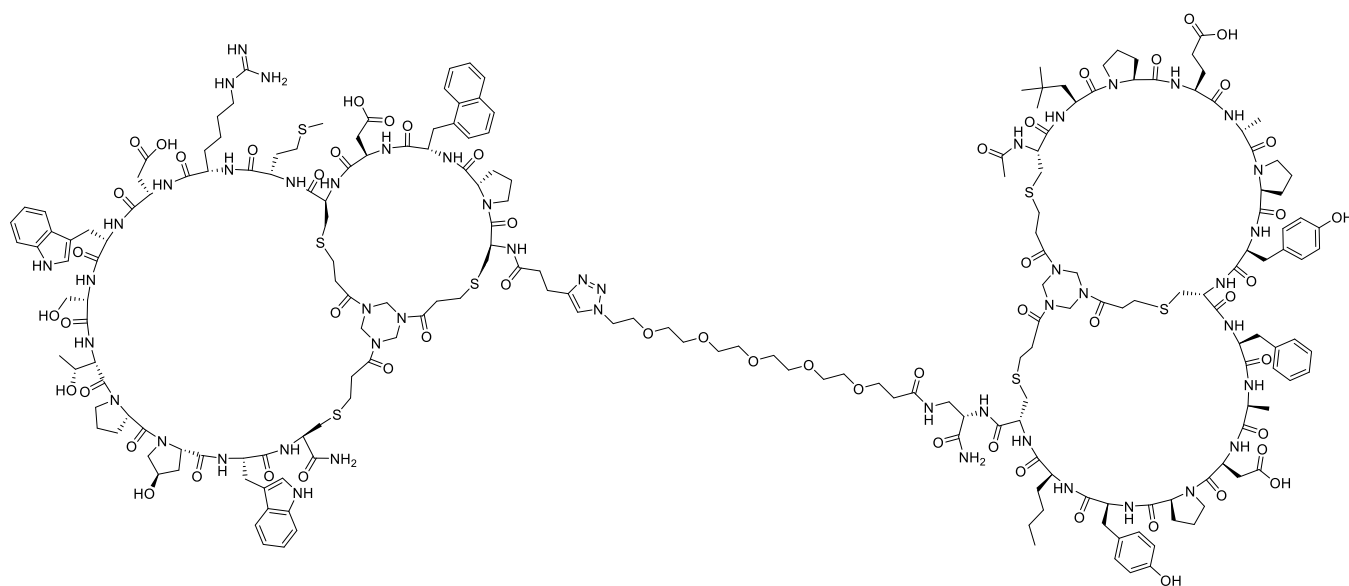

## BCY10578

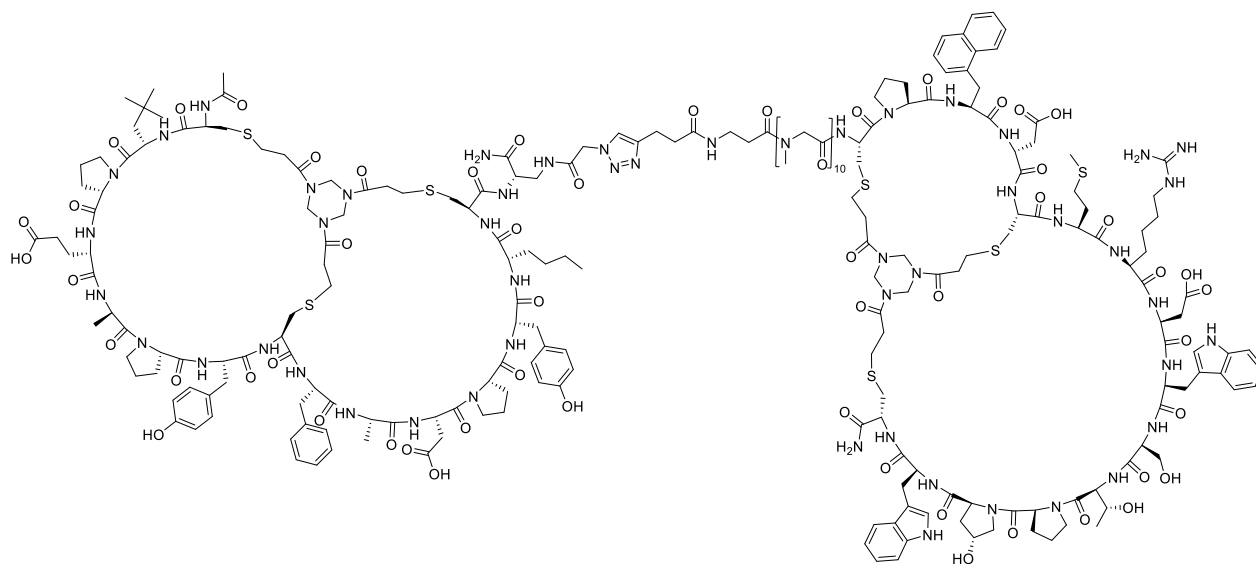

## BCY10917

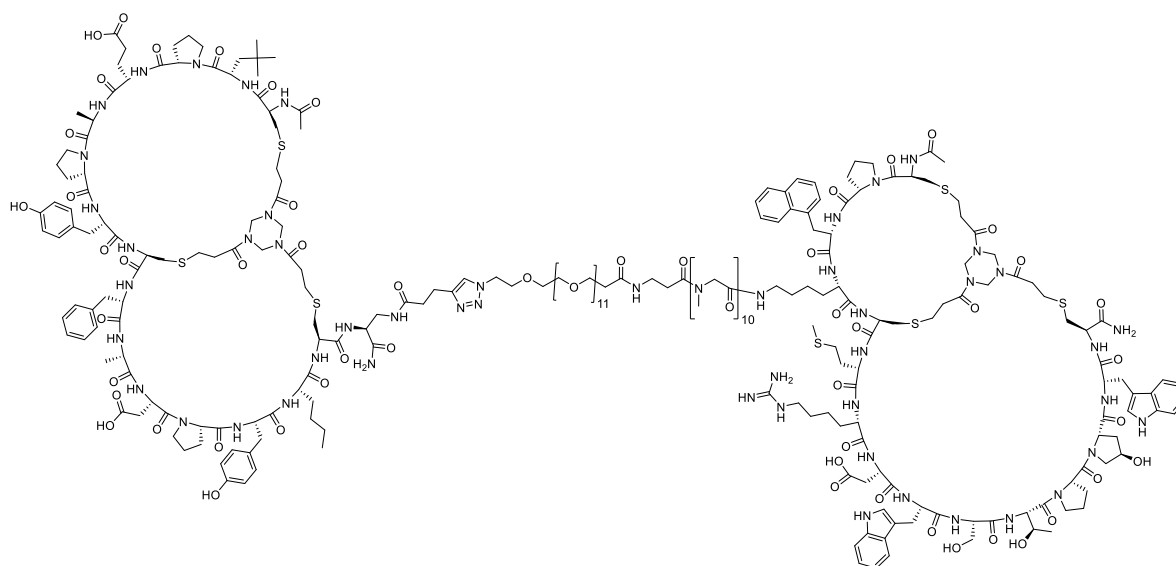

BCY10918

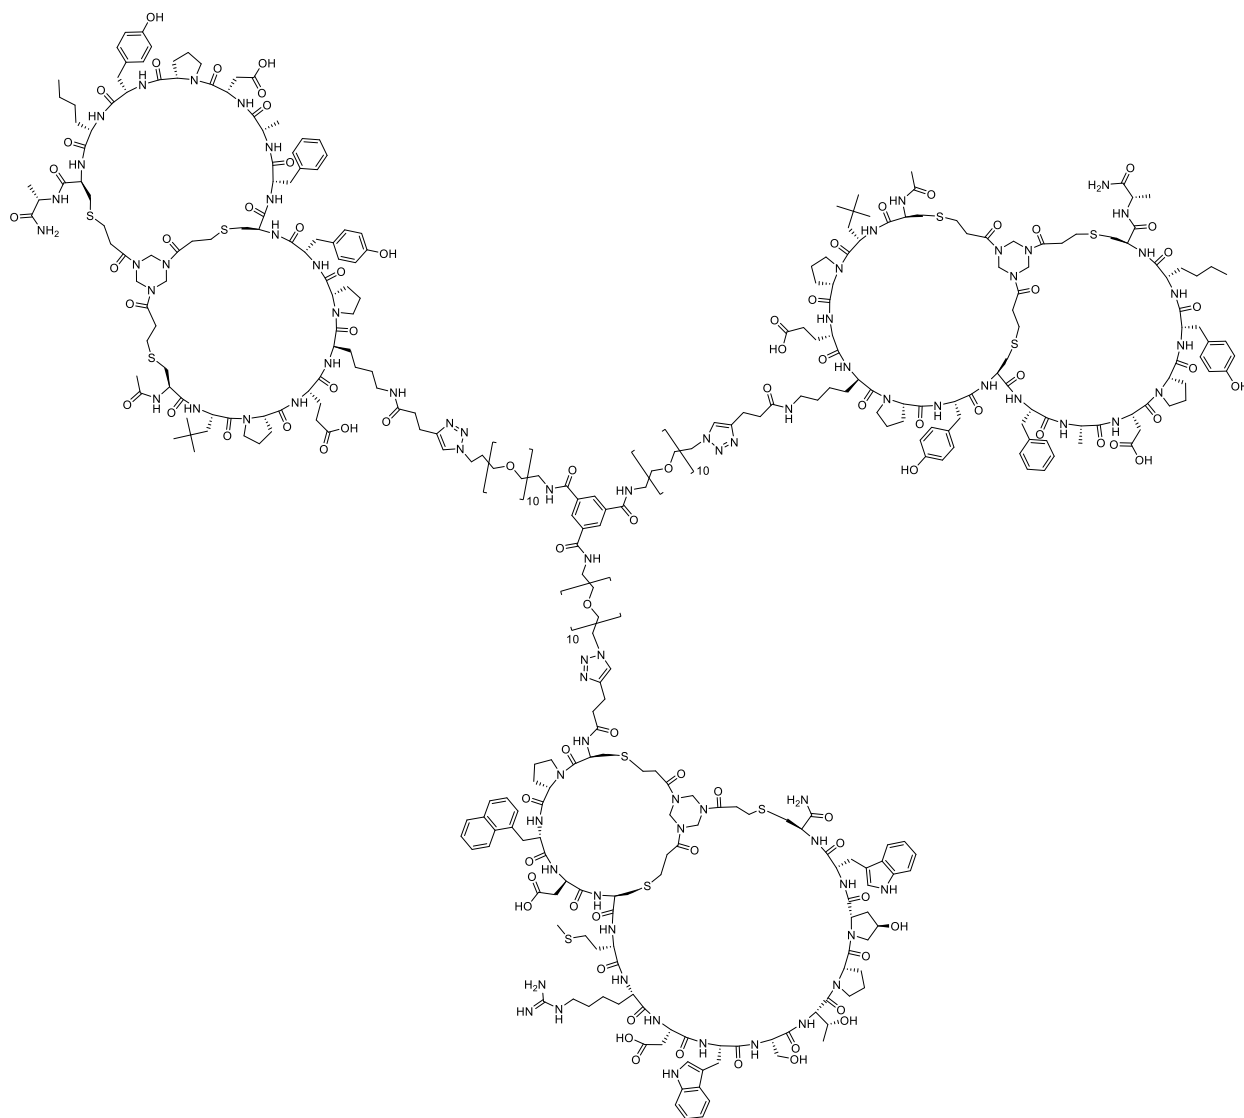

BCY11022

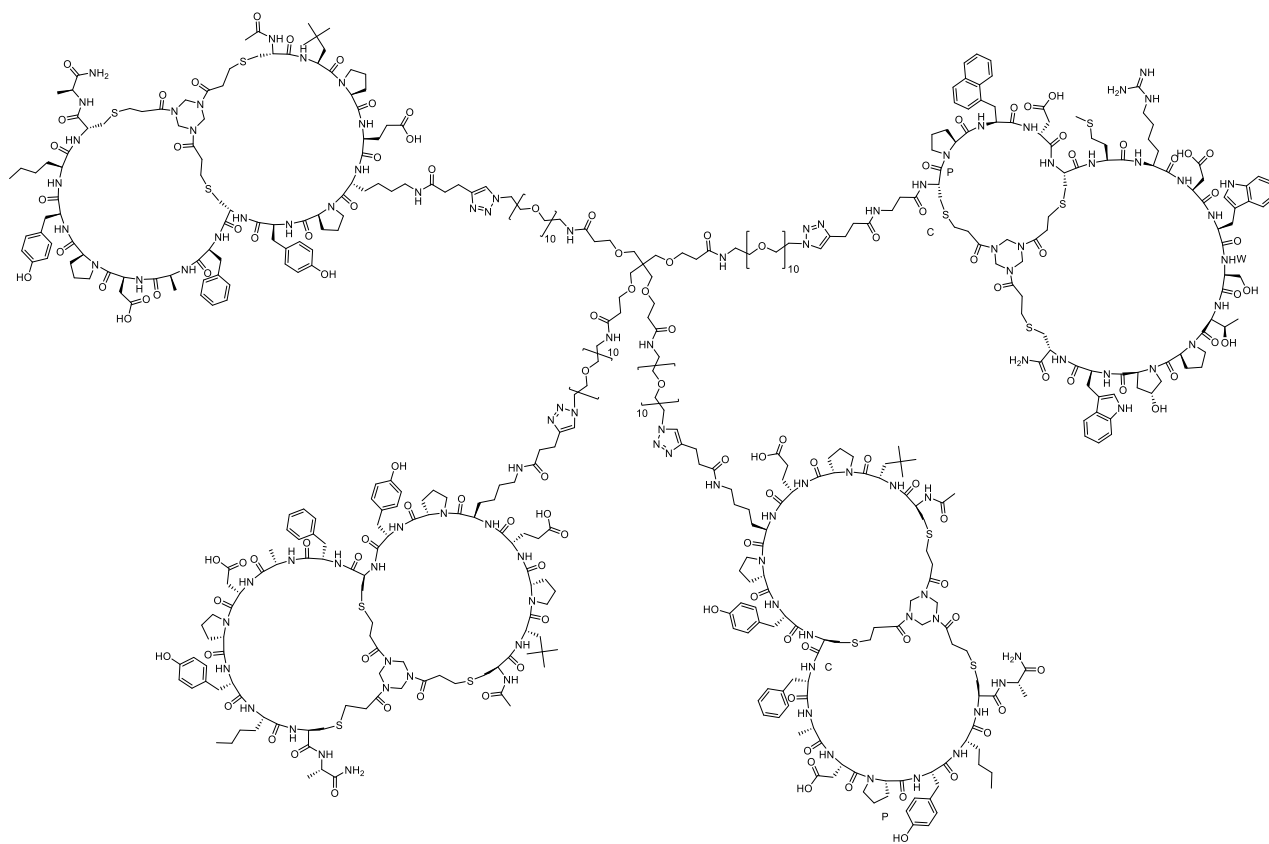

BCY11027

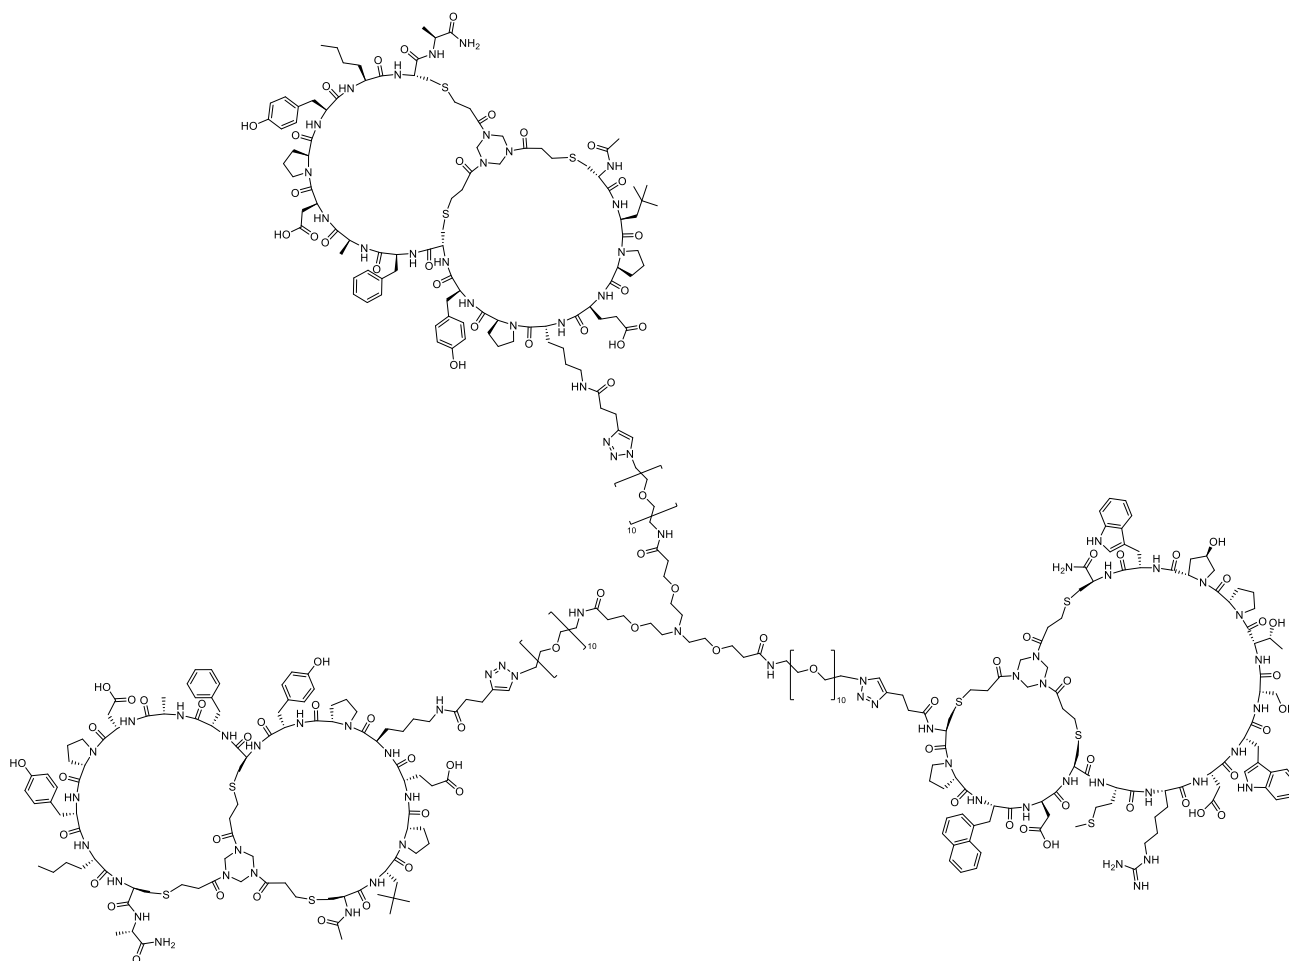

# BCY11373

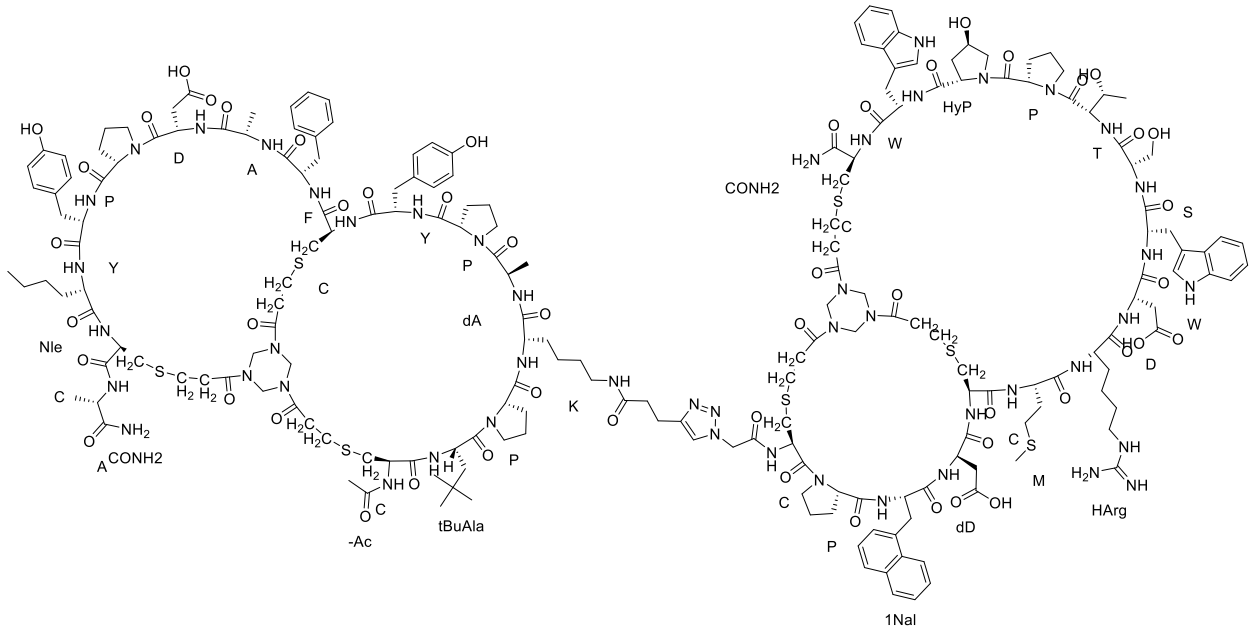

# BCY11374

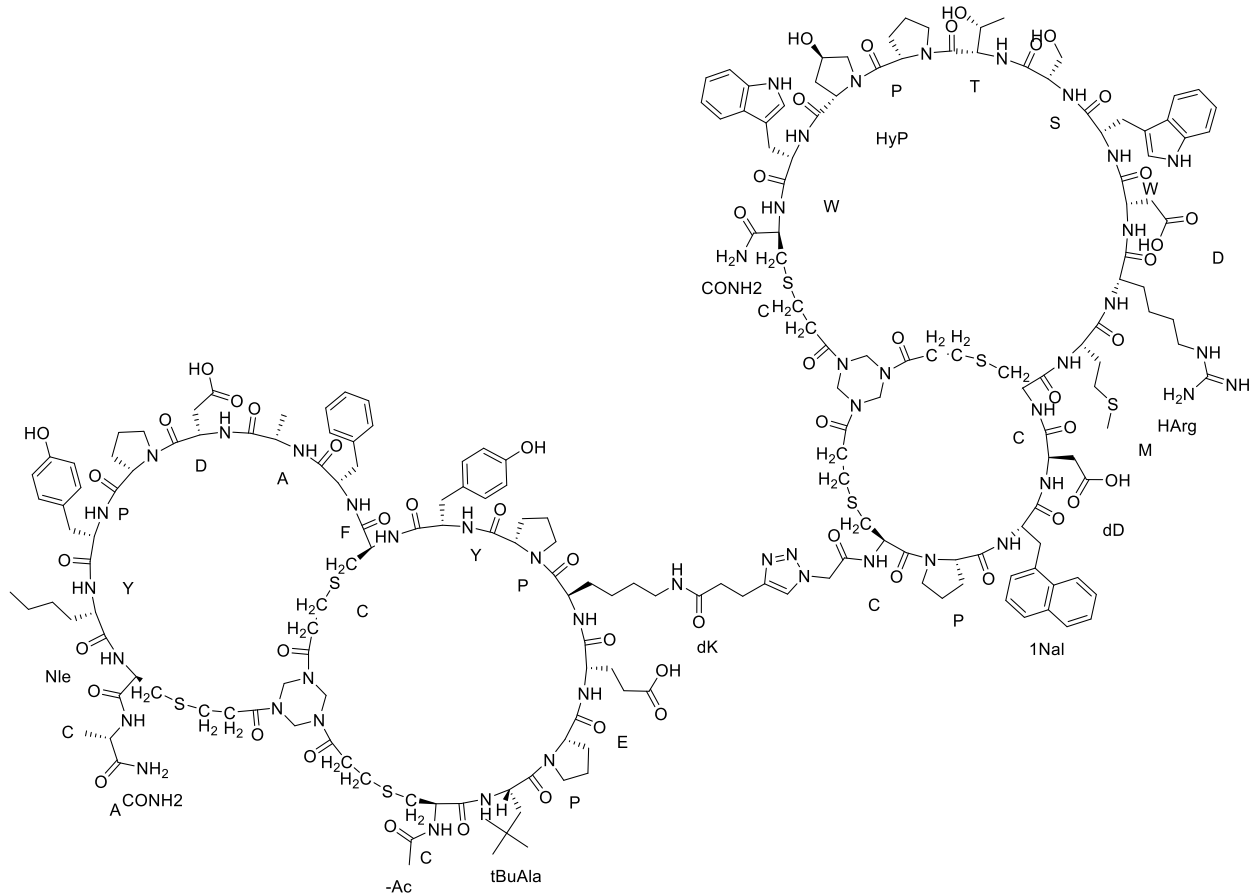

BCY11375

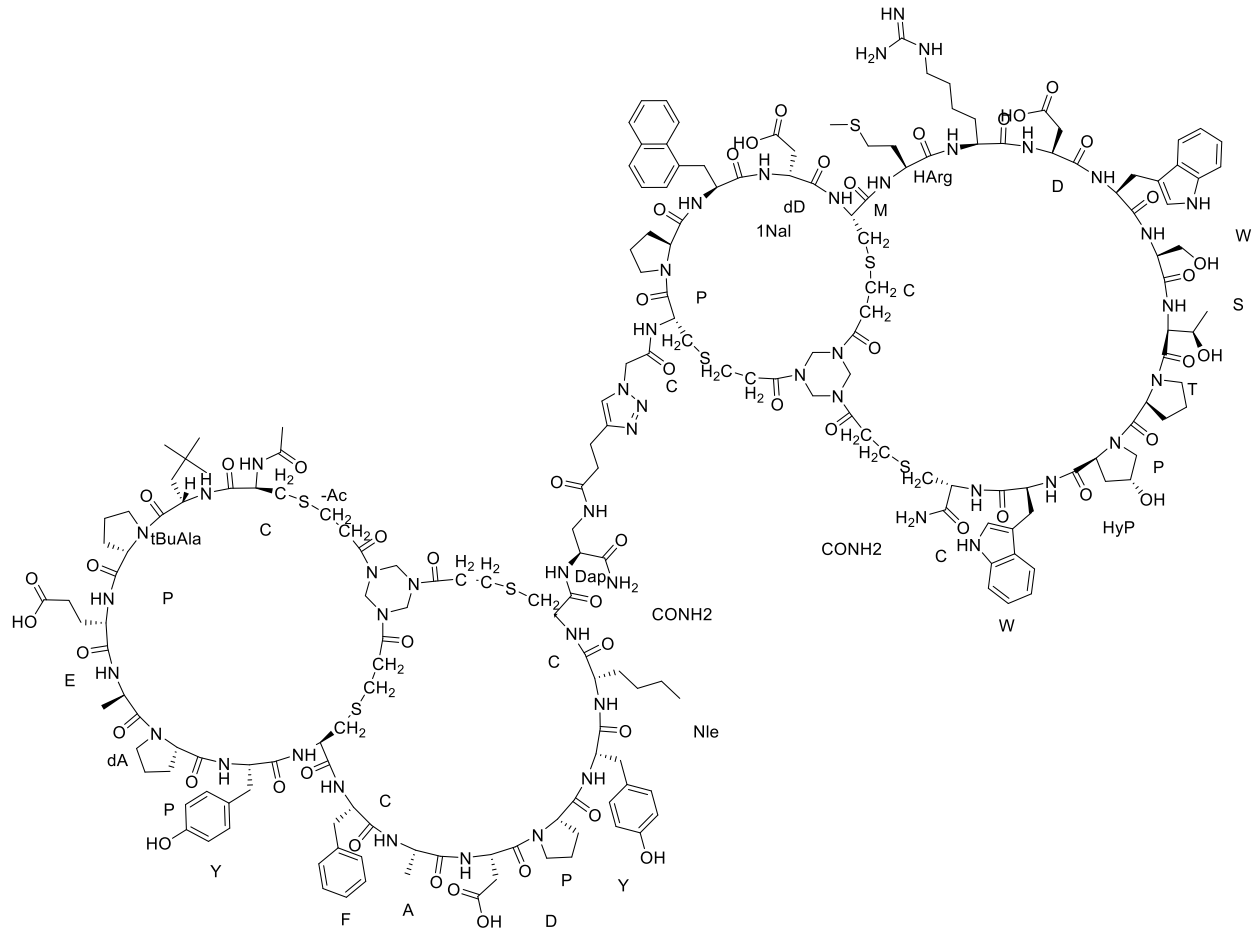

BCY11384

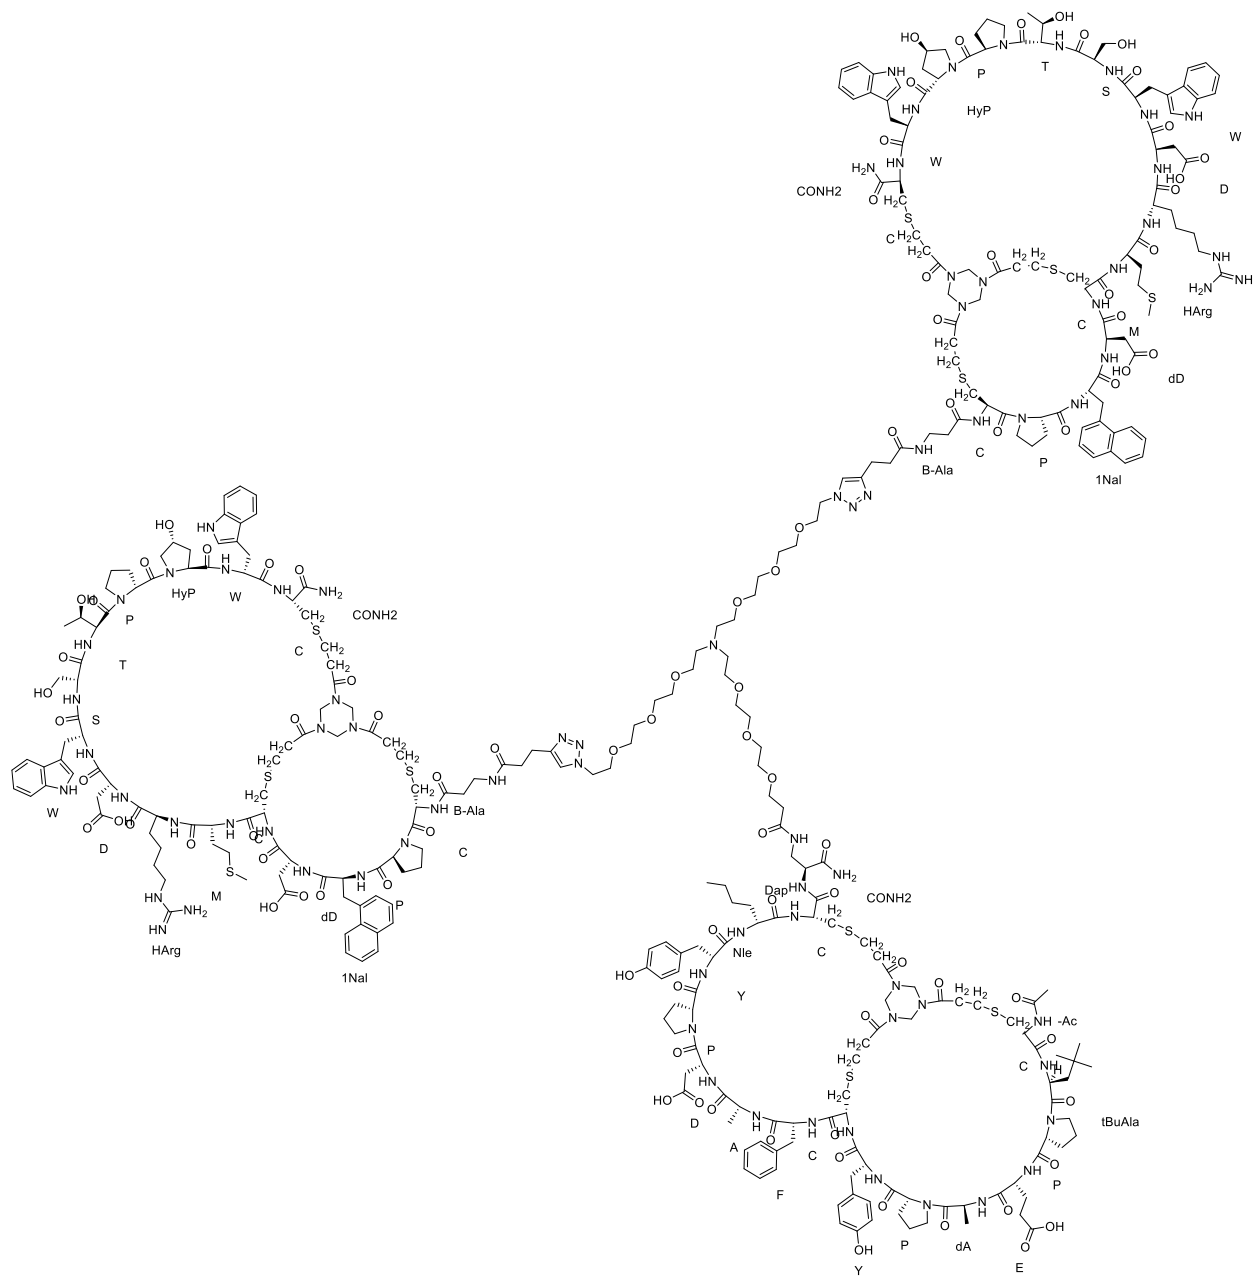



BCY11385

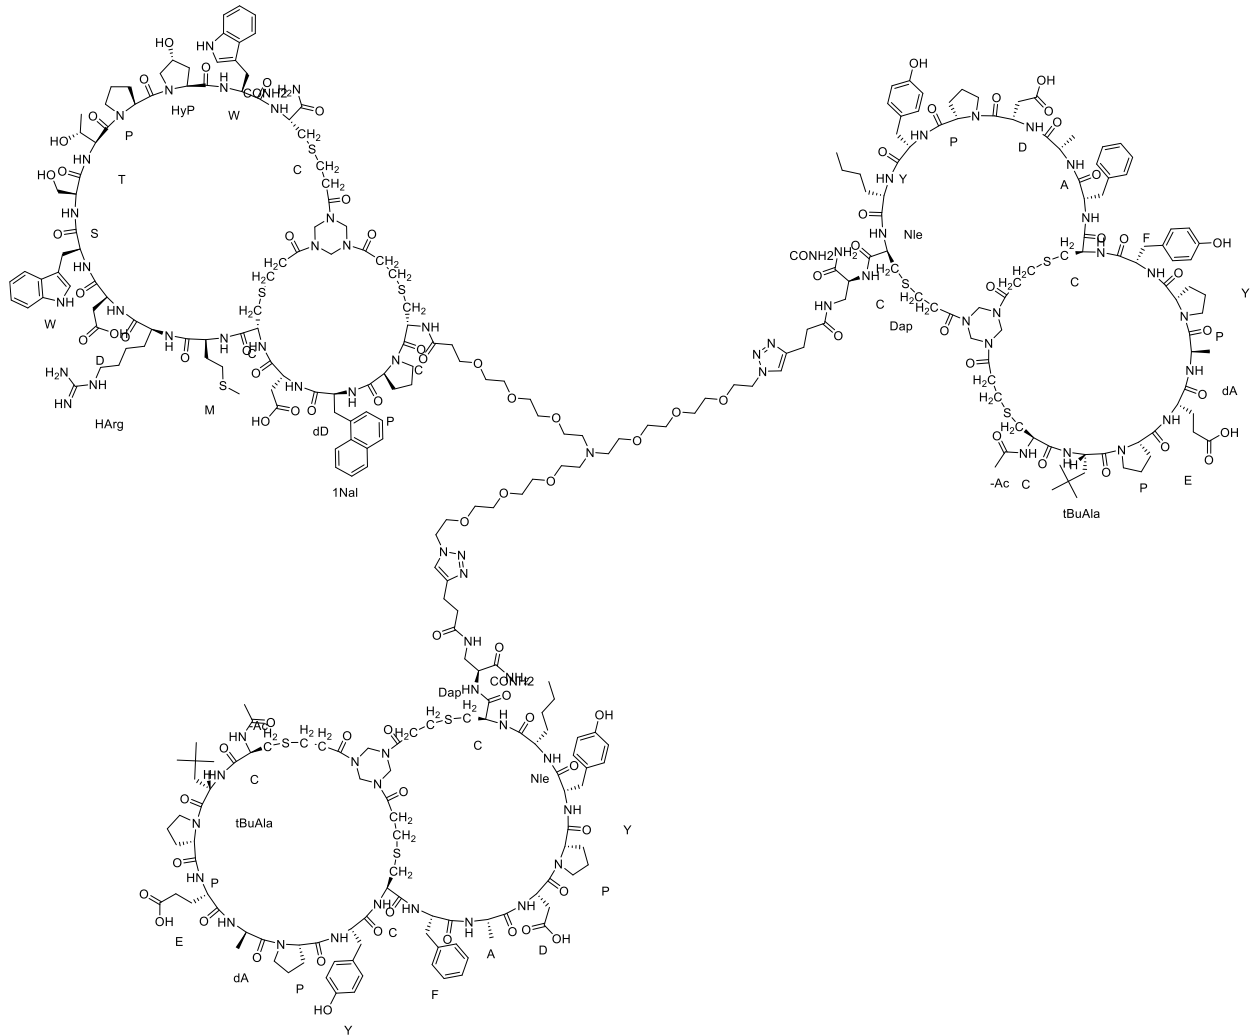

BCY11616

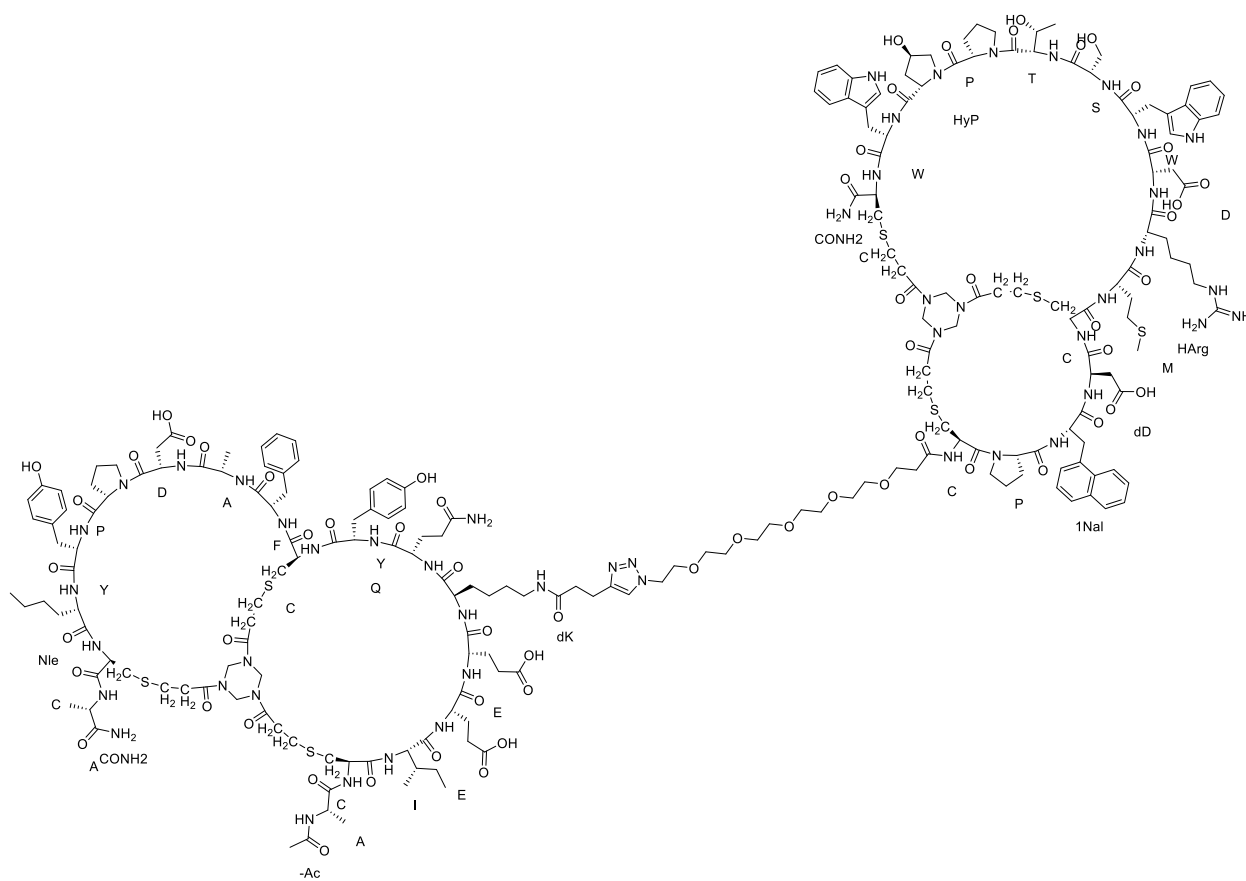

BCY11858

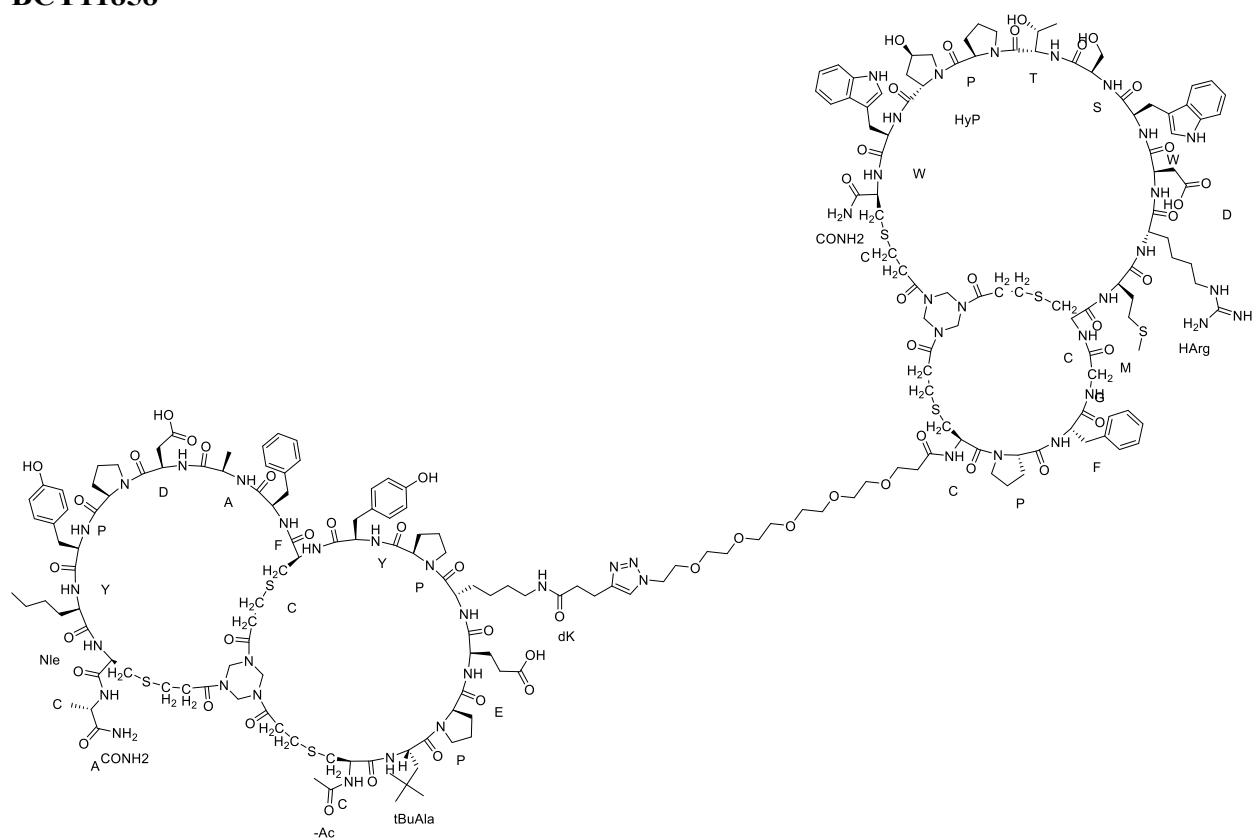

BCY11863

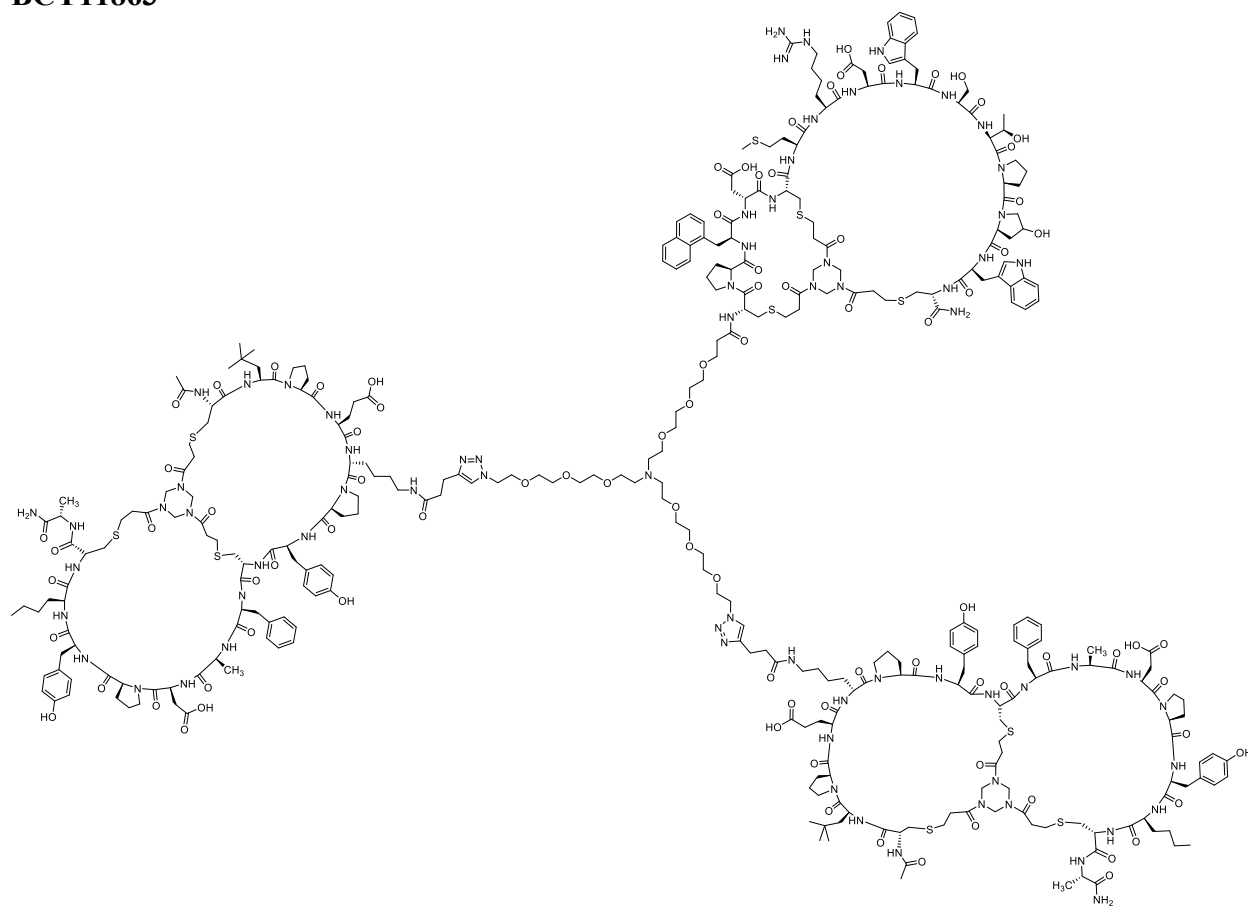

**BCY11864**

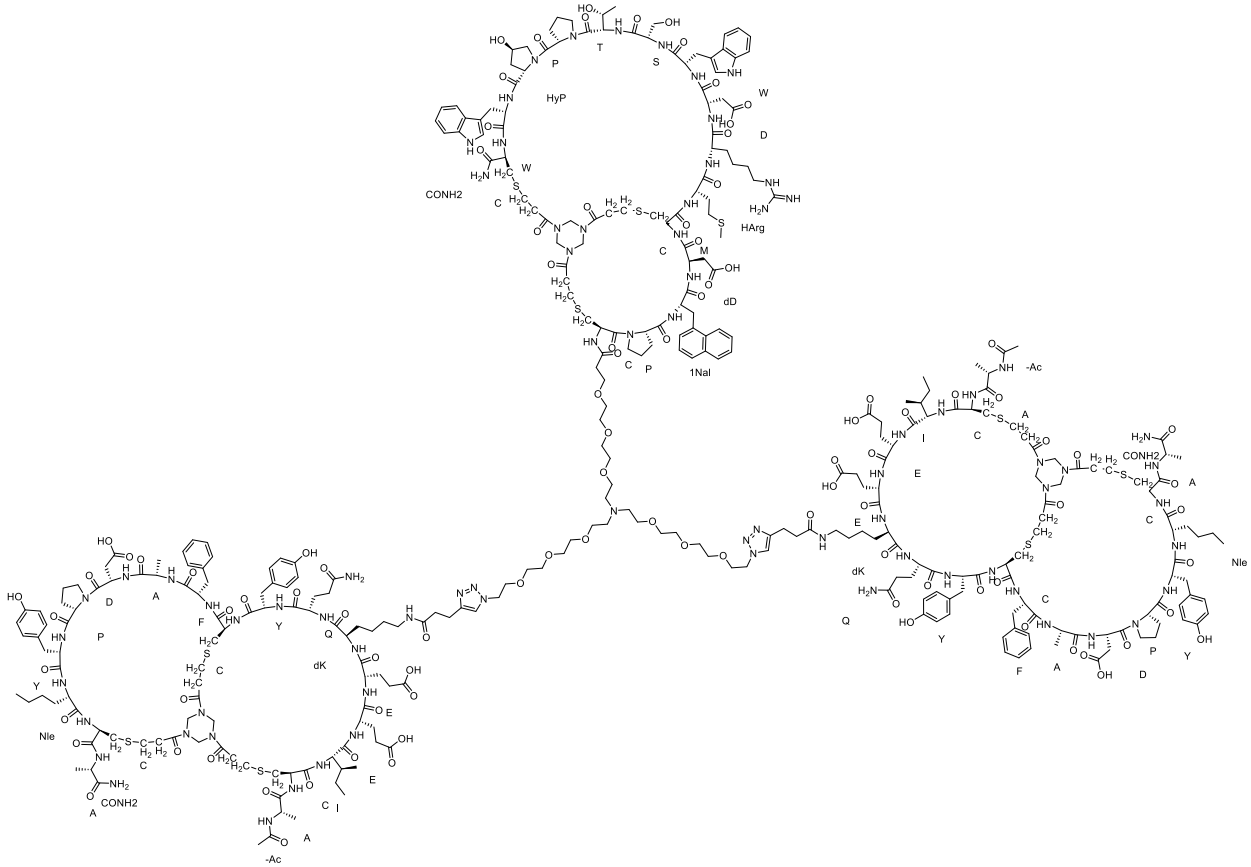

**BCY12238**

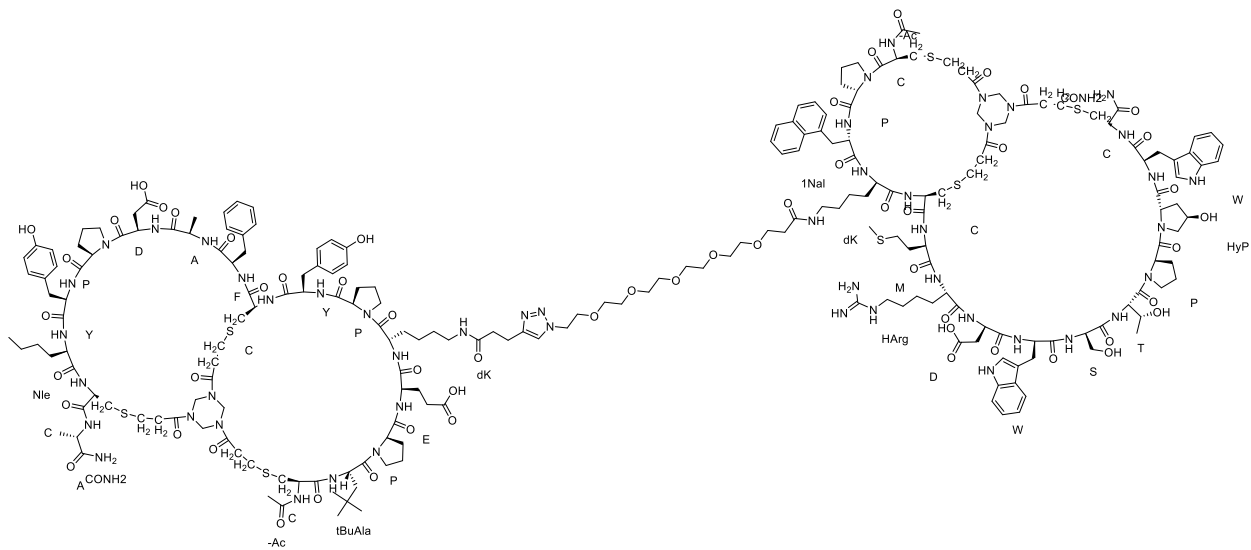

BCY12377

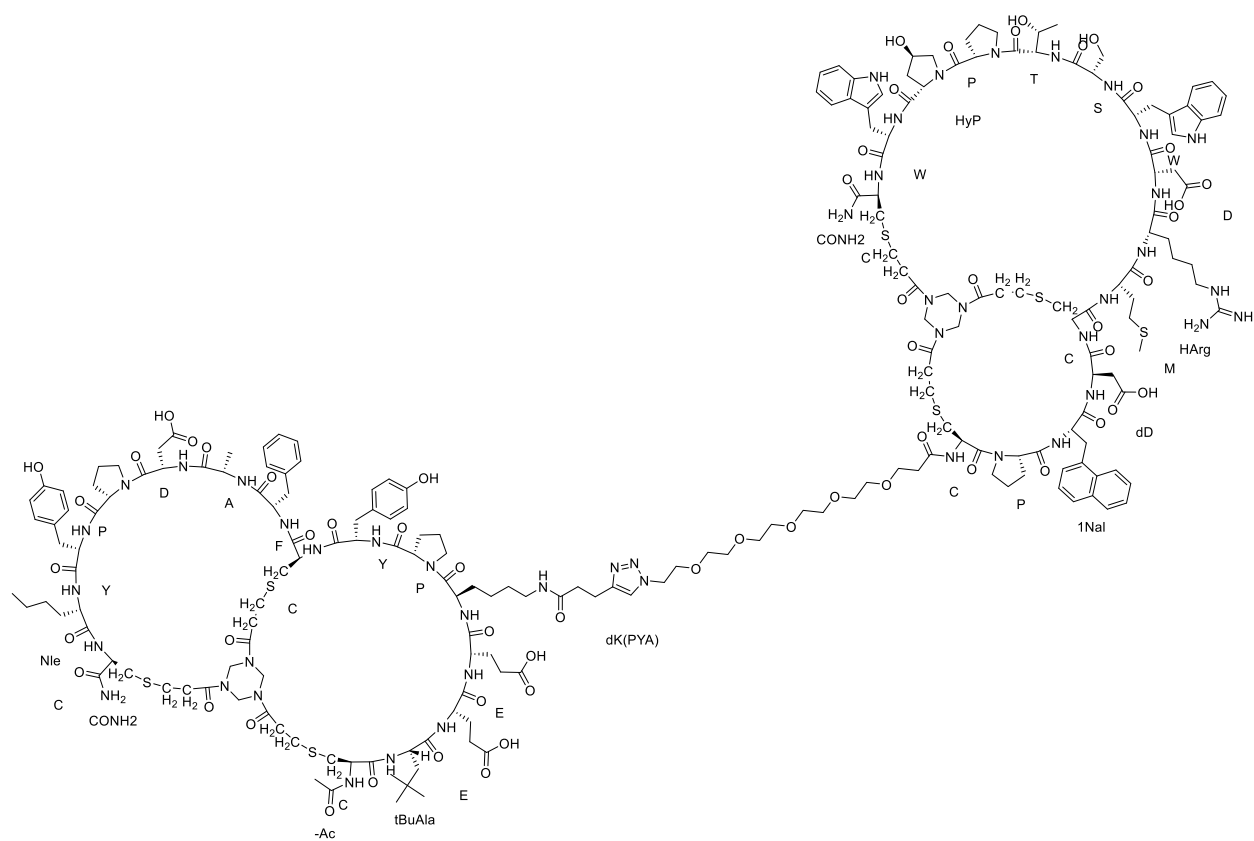

BCY12378

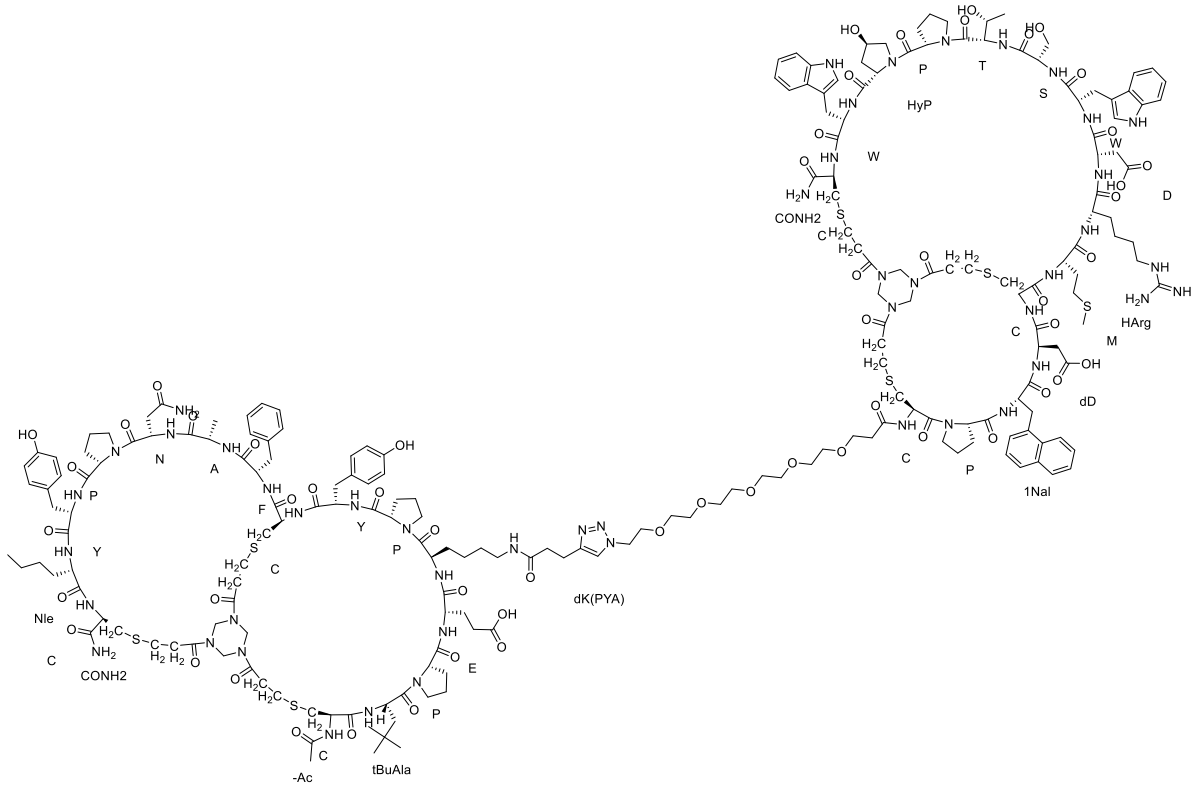

BCY12379

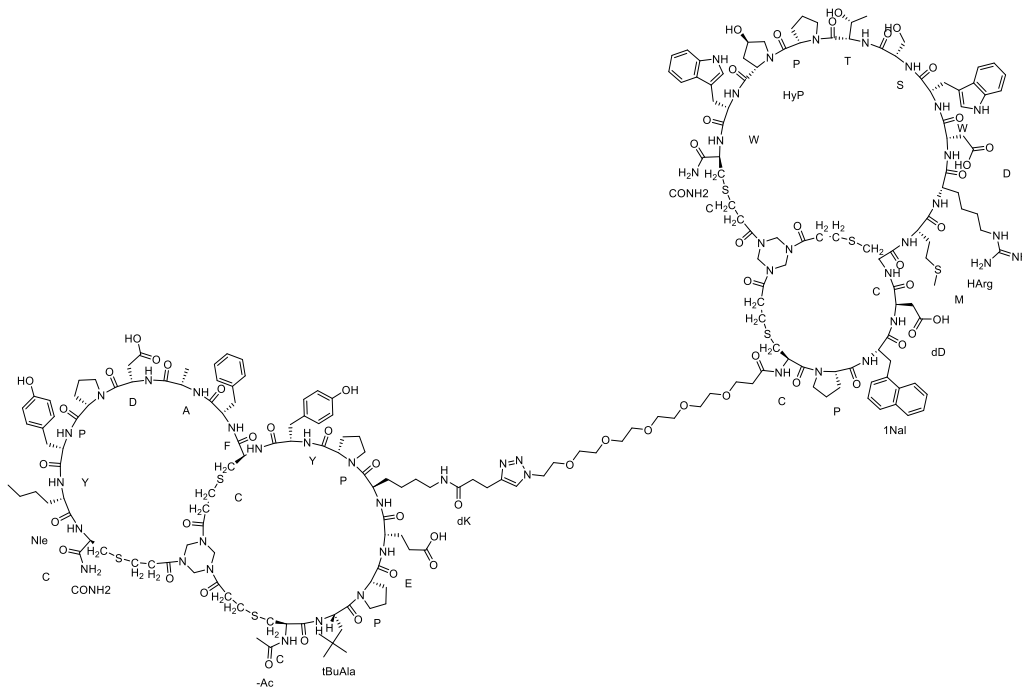

**BCY12481**

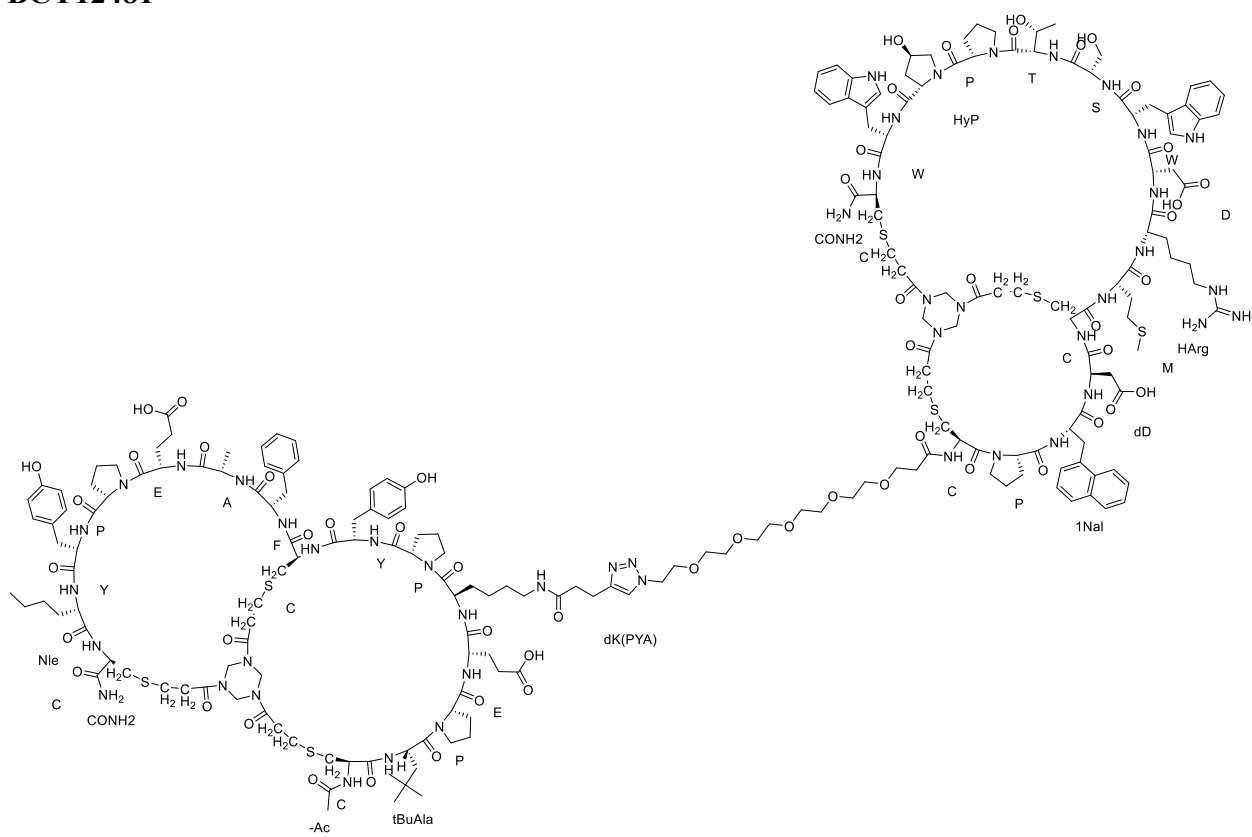



BCY12484

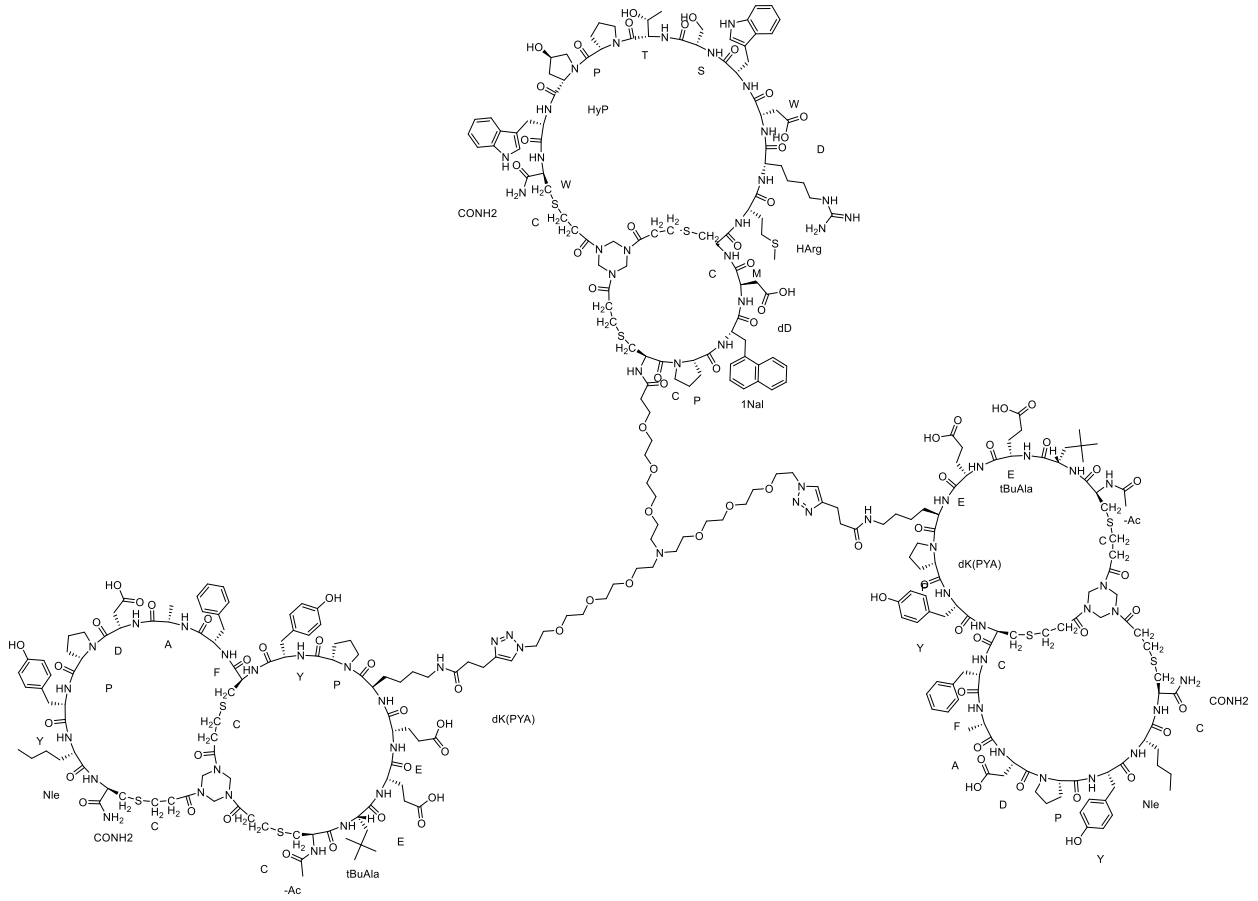

BCY12485

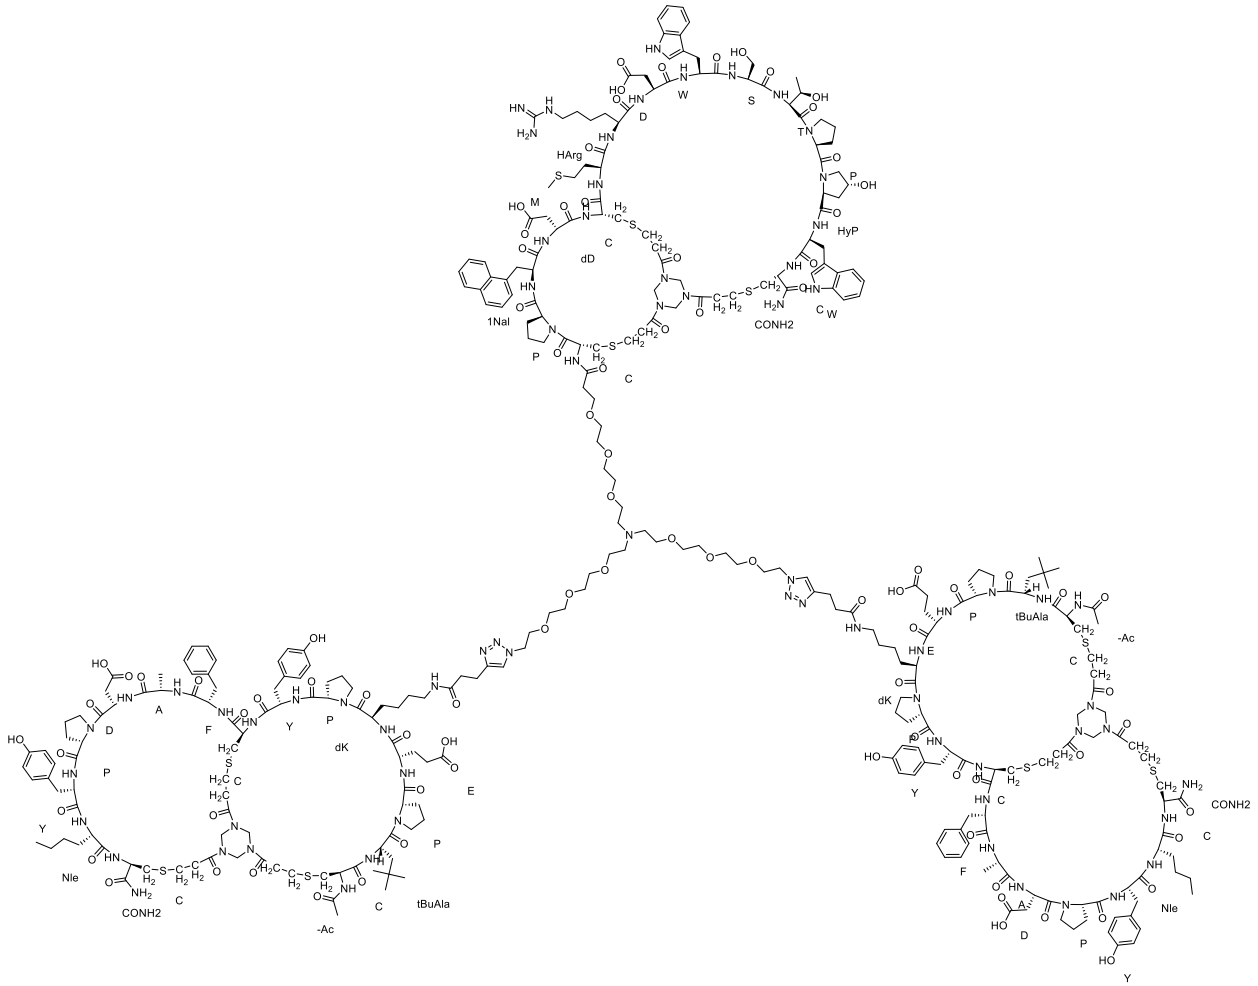

BCY12486

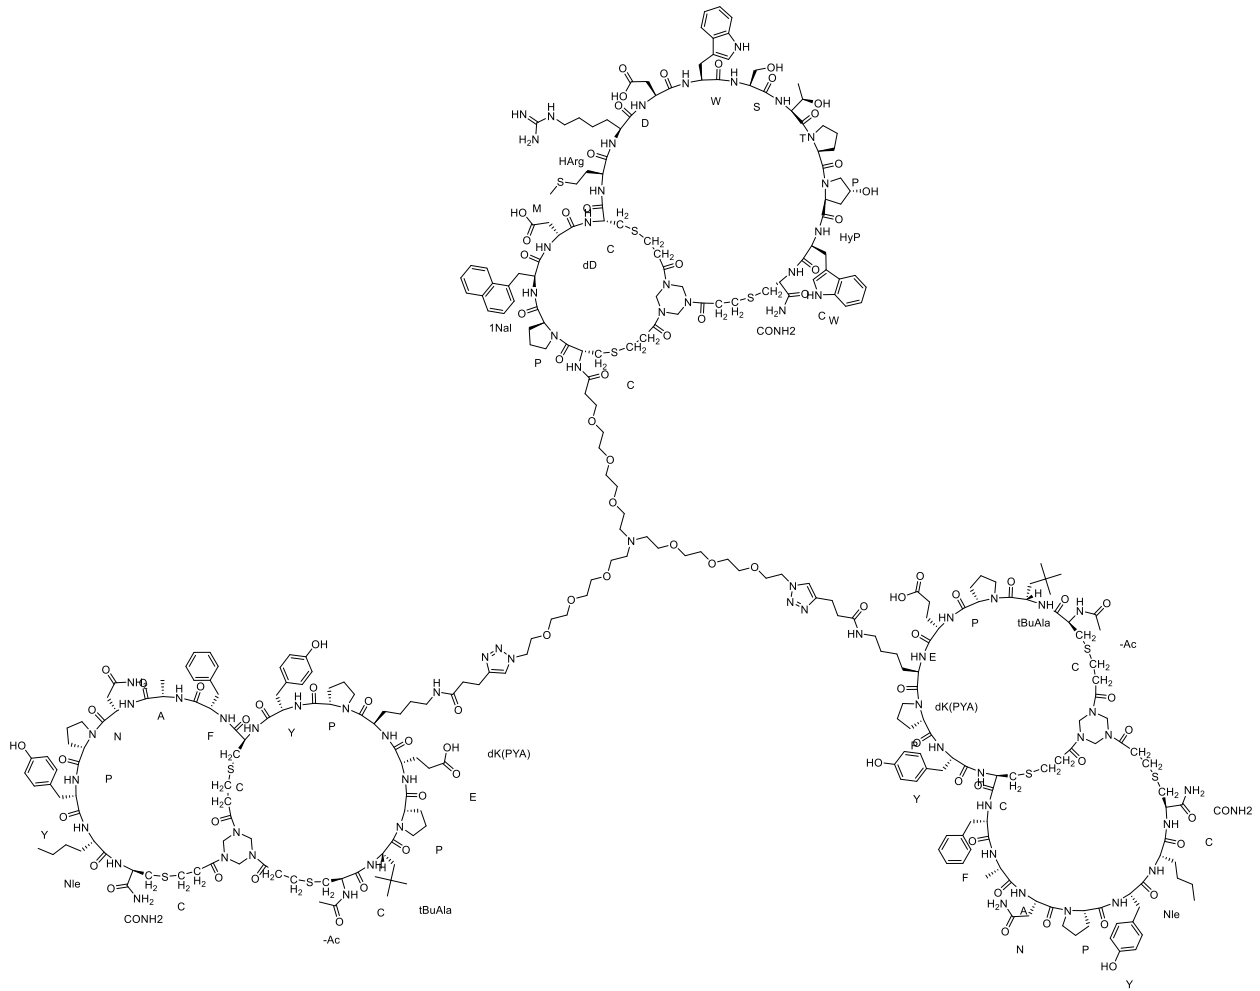

BCY12487

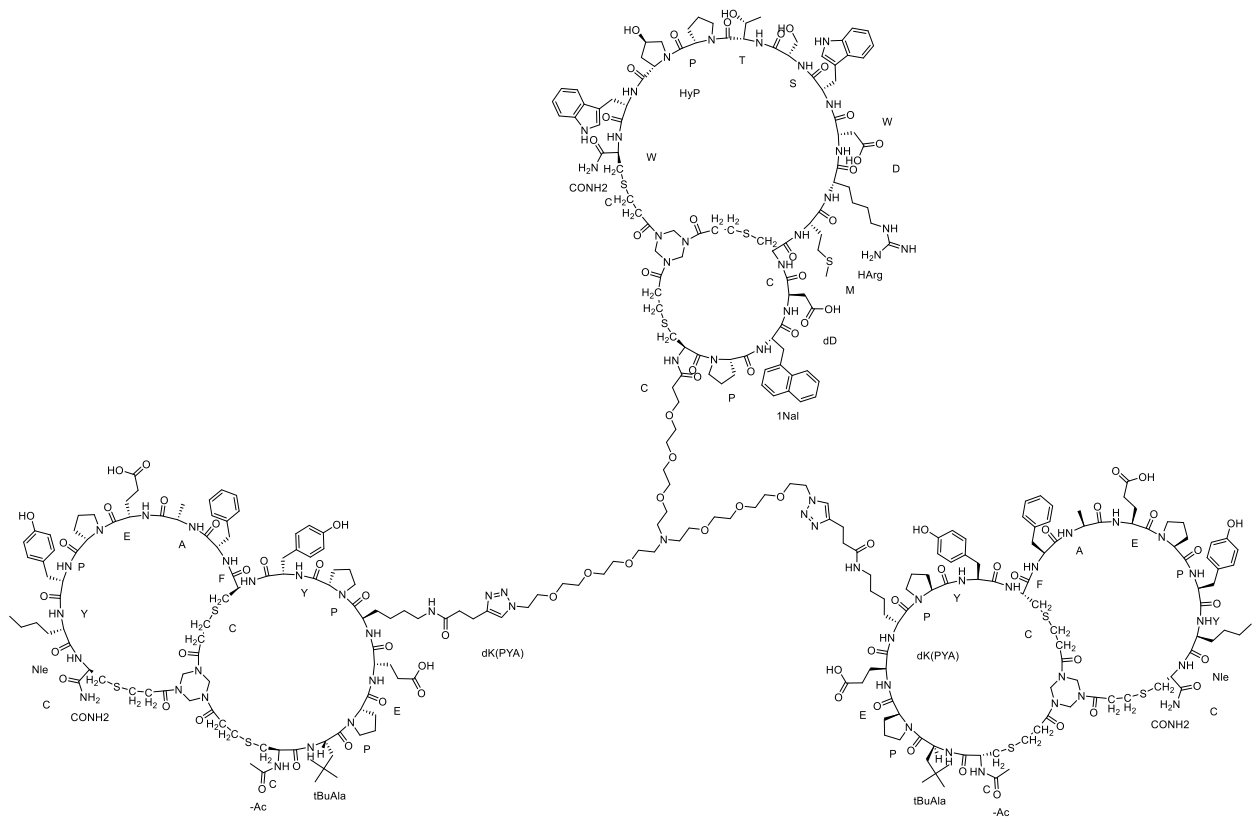

BCY12587

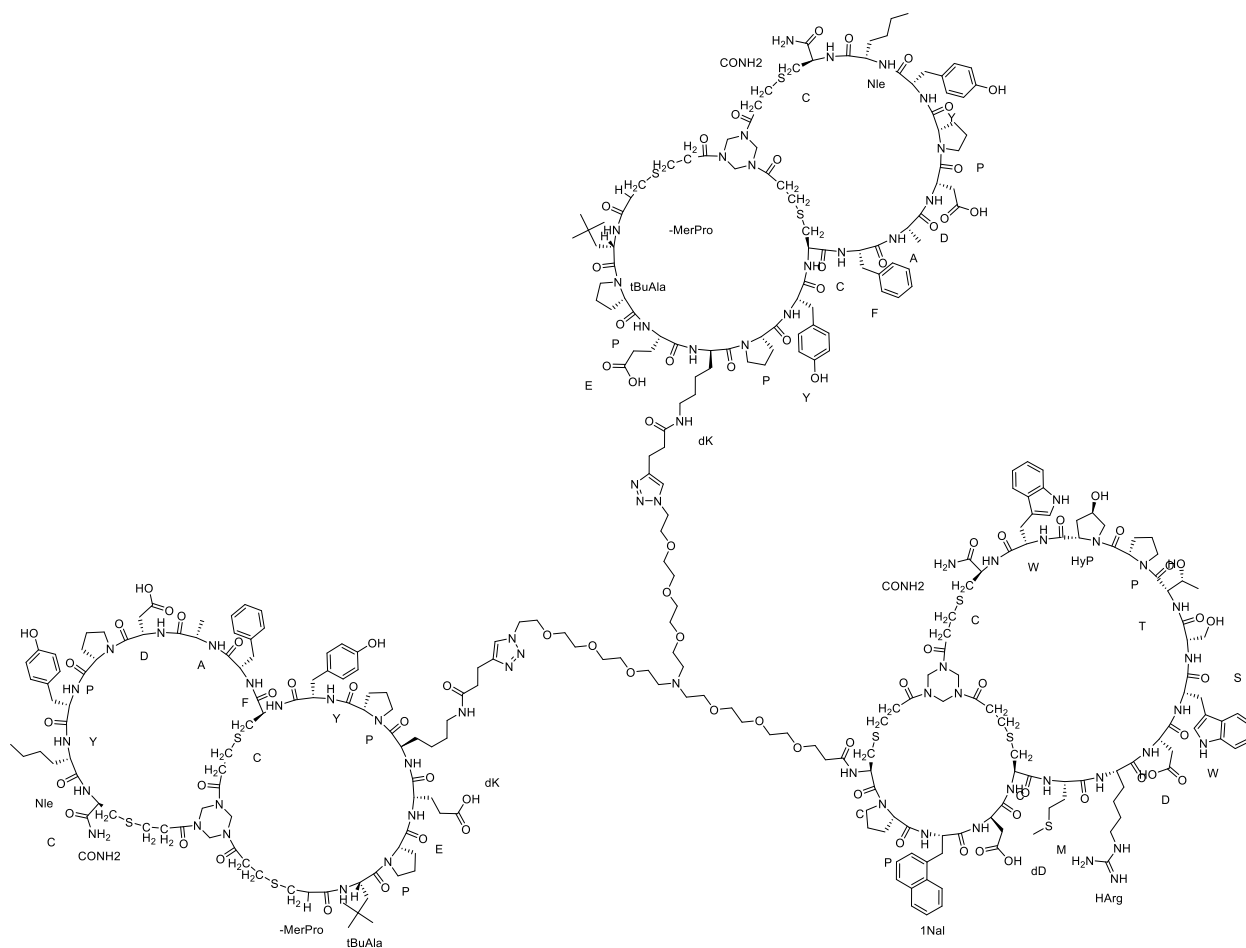

BCY12588

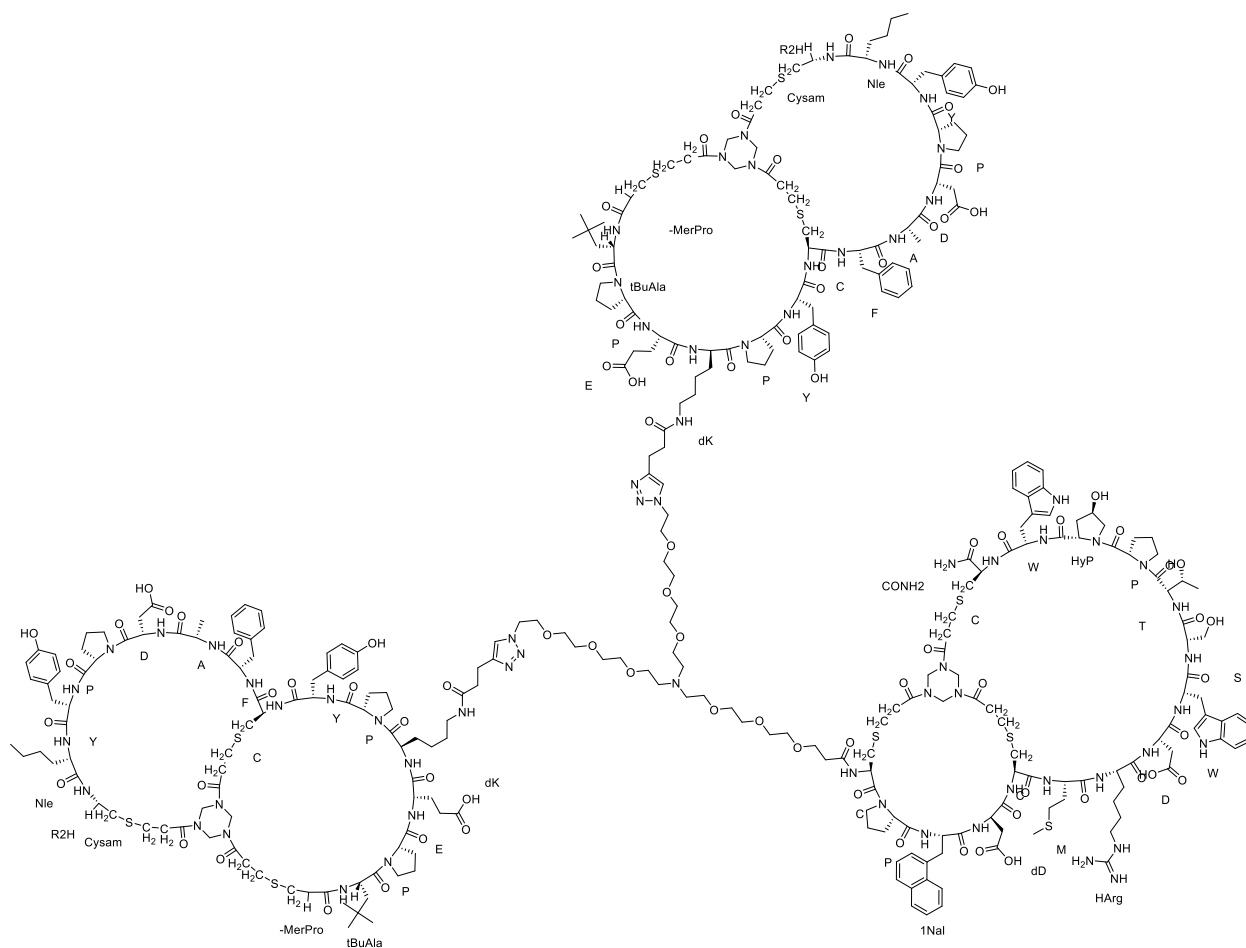

# BCY12709

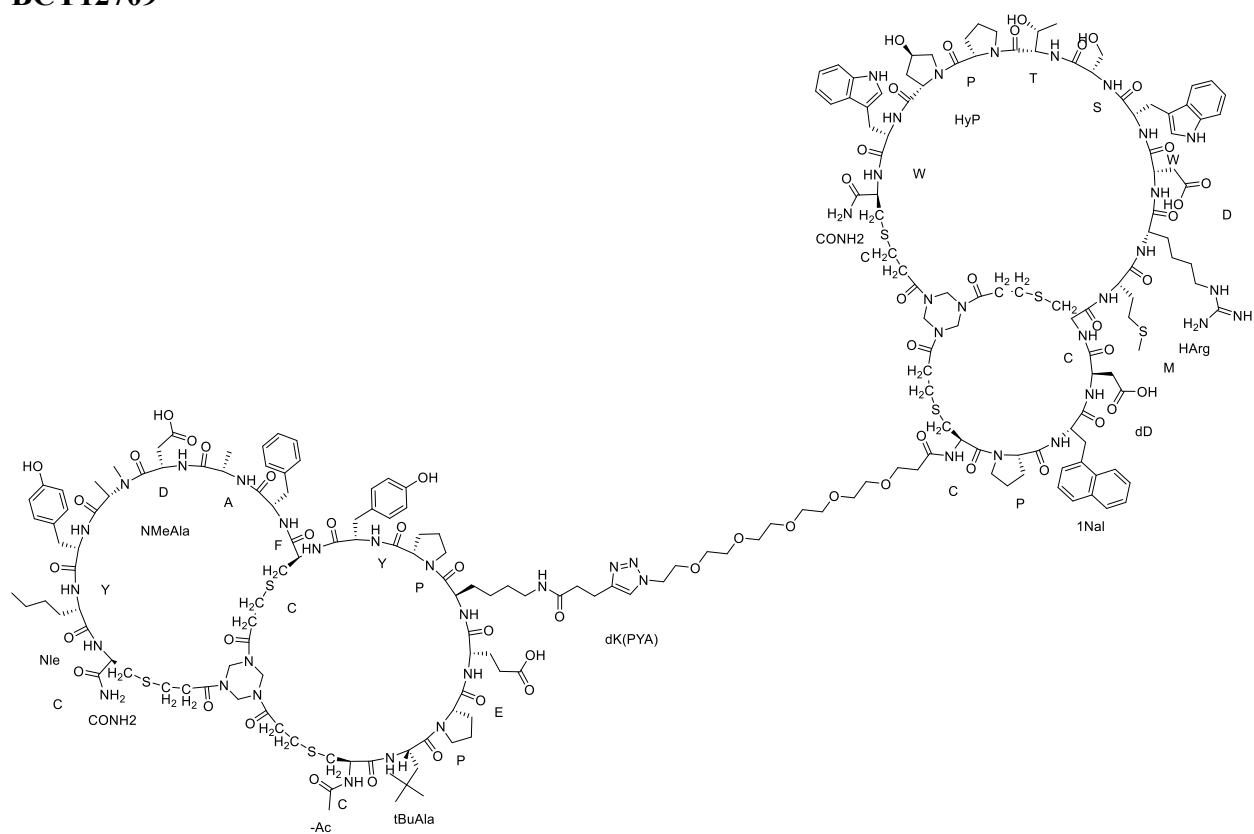

BCY12710

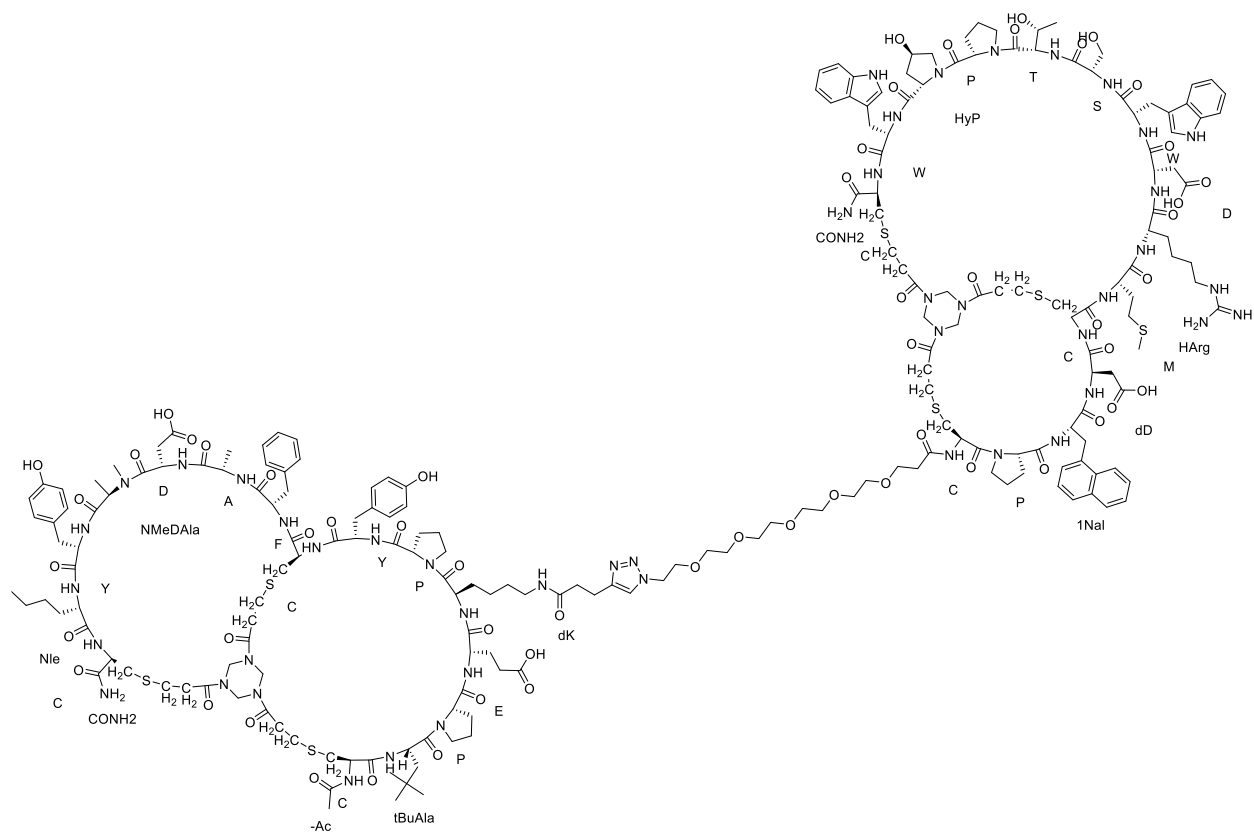



BCY12760

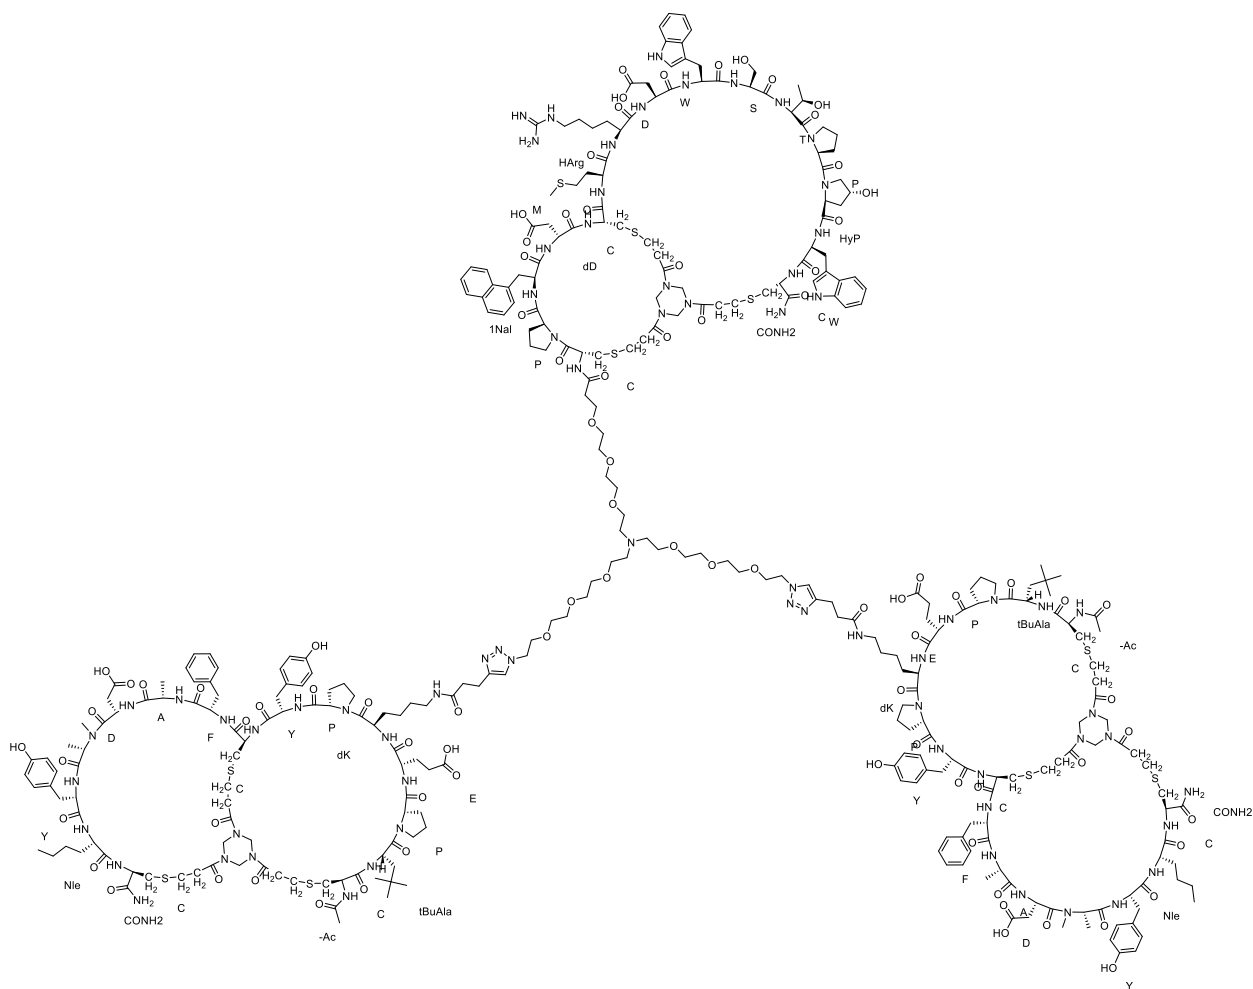

BCY12761

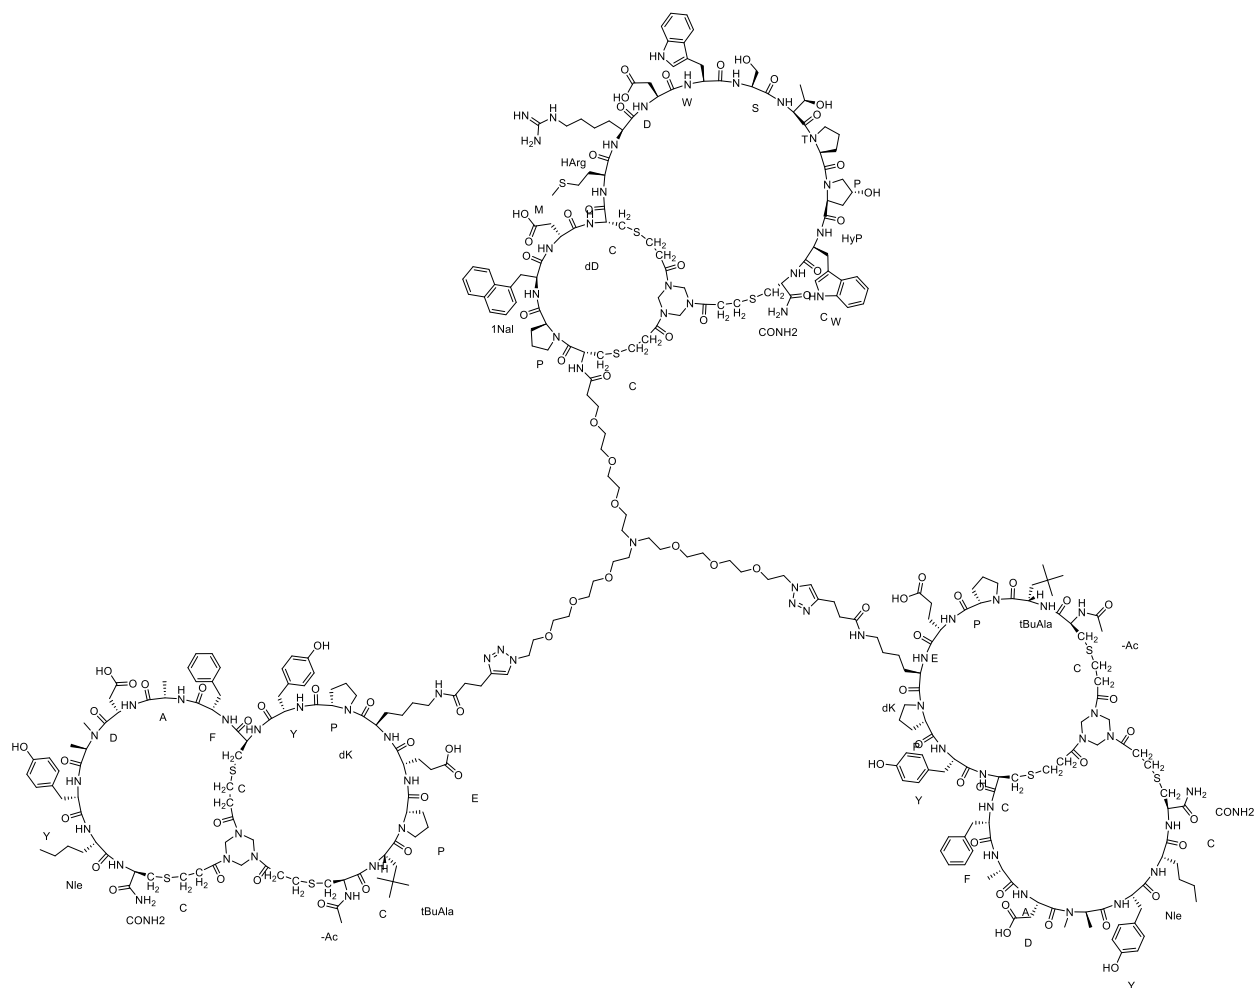

BCY12970

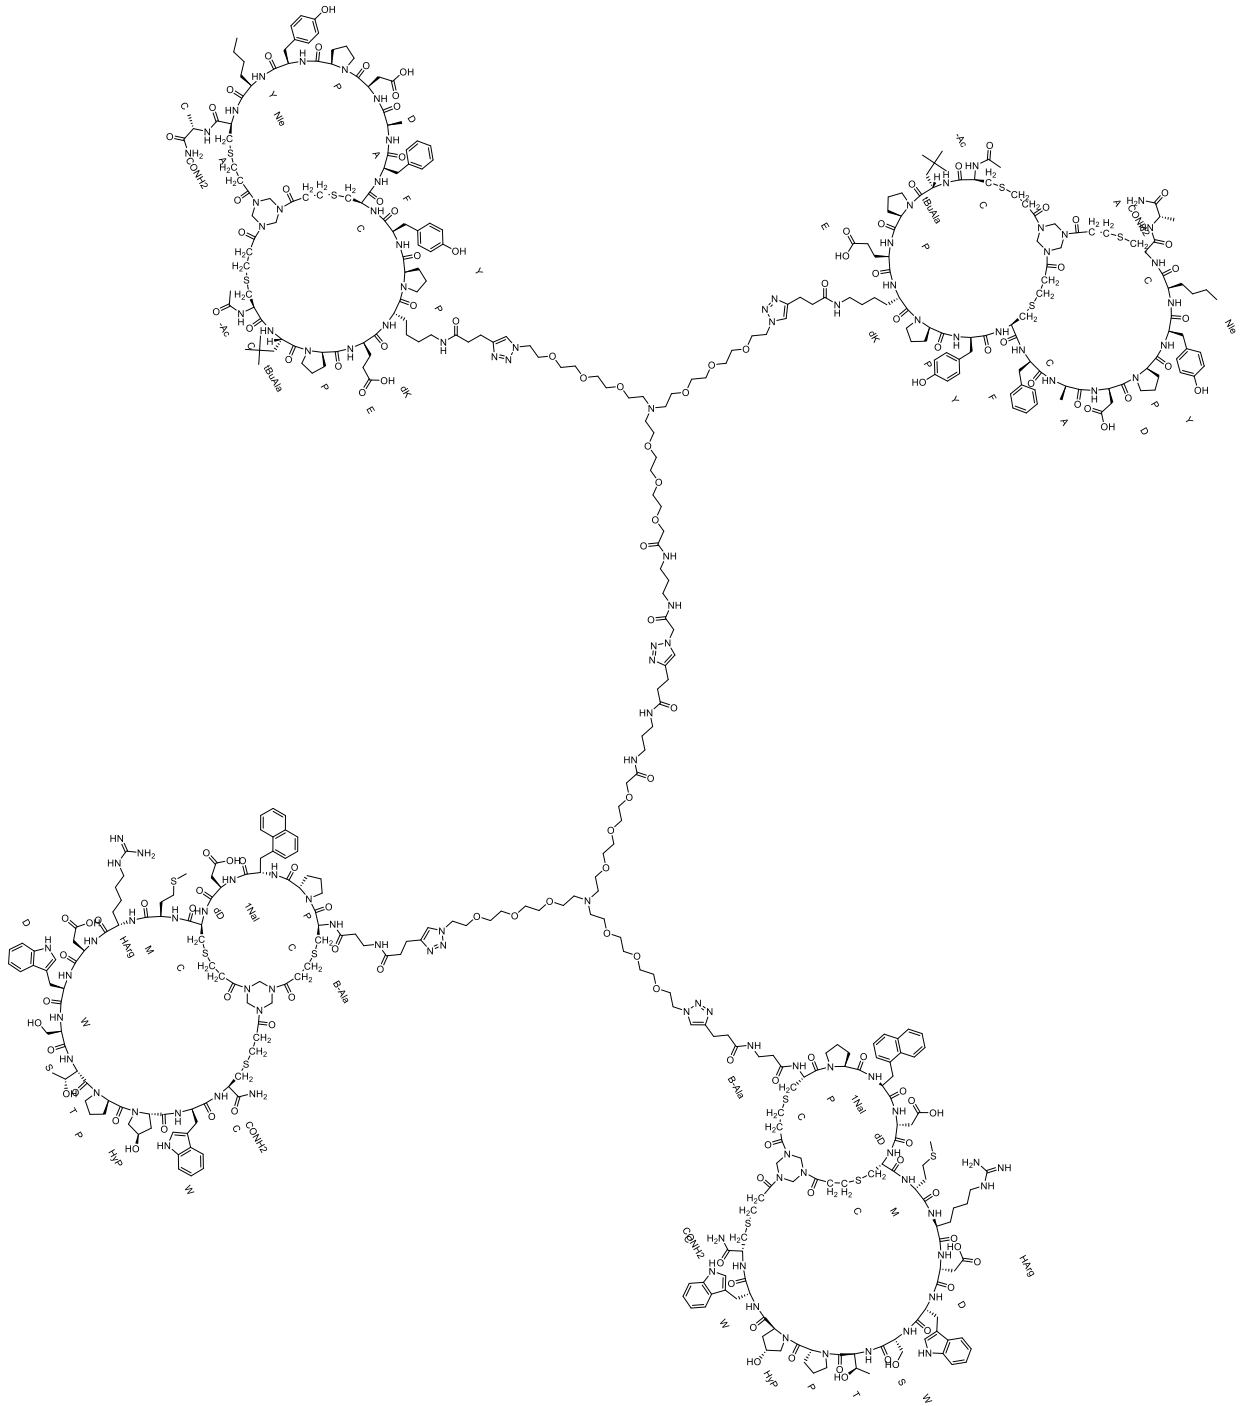

BCY12797

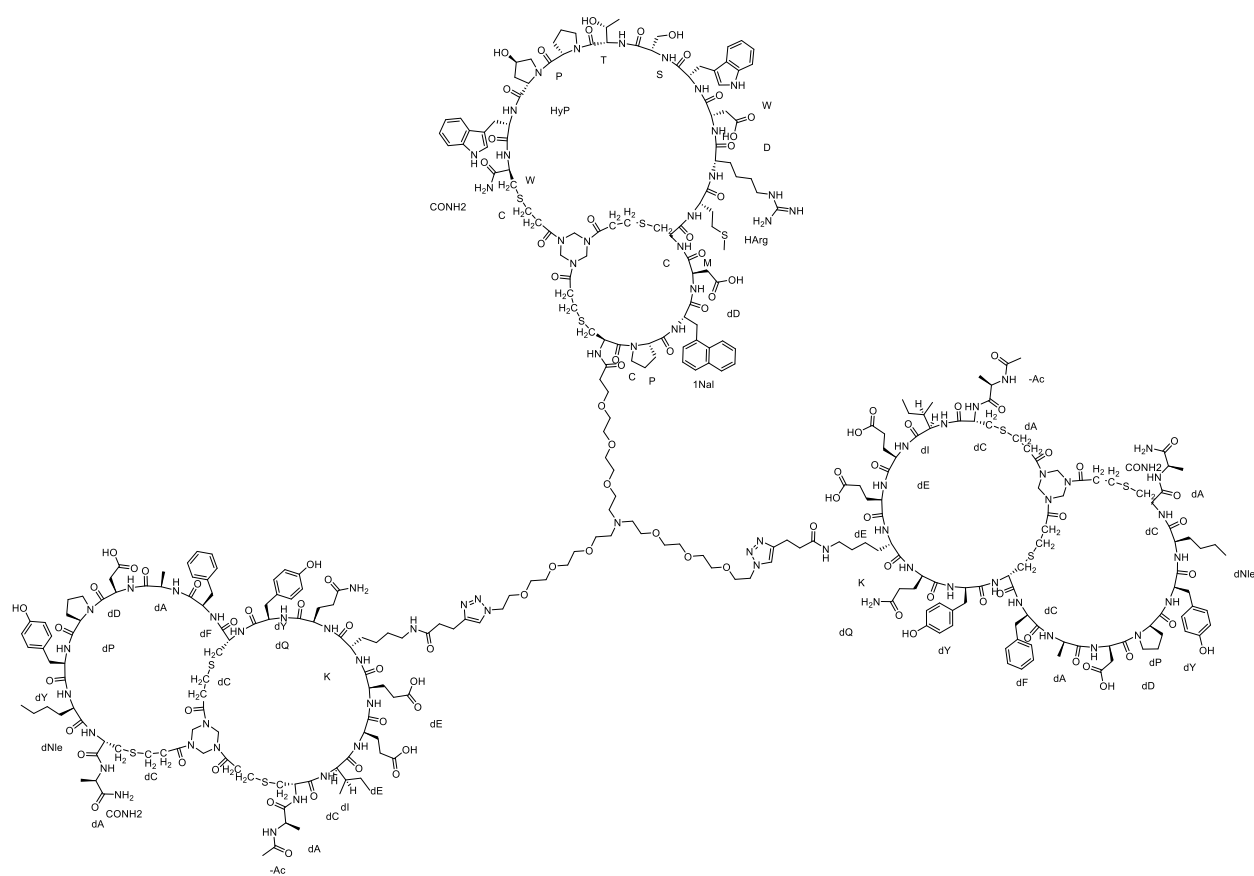

BCY12572

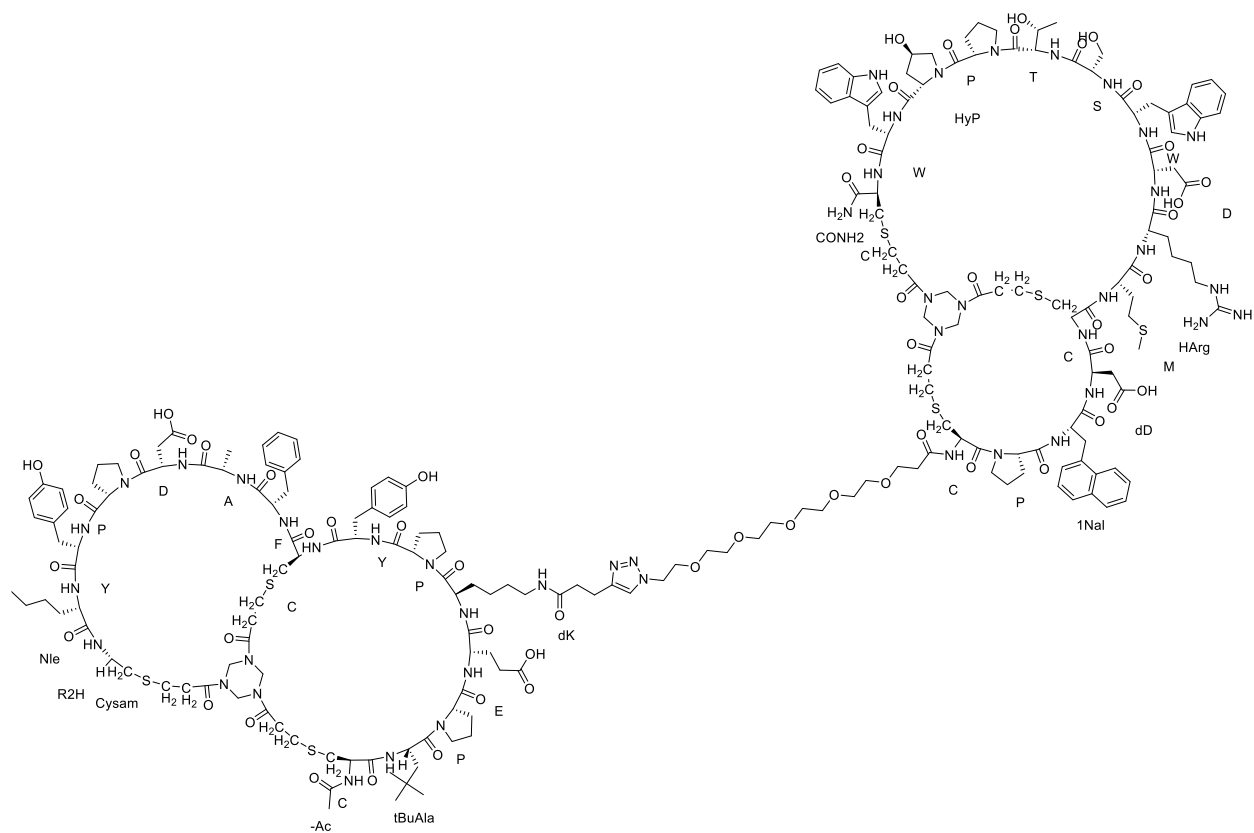

BCY12573

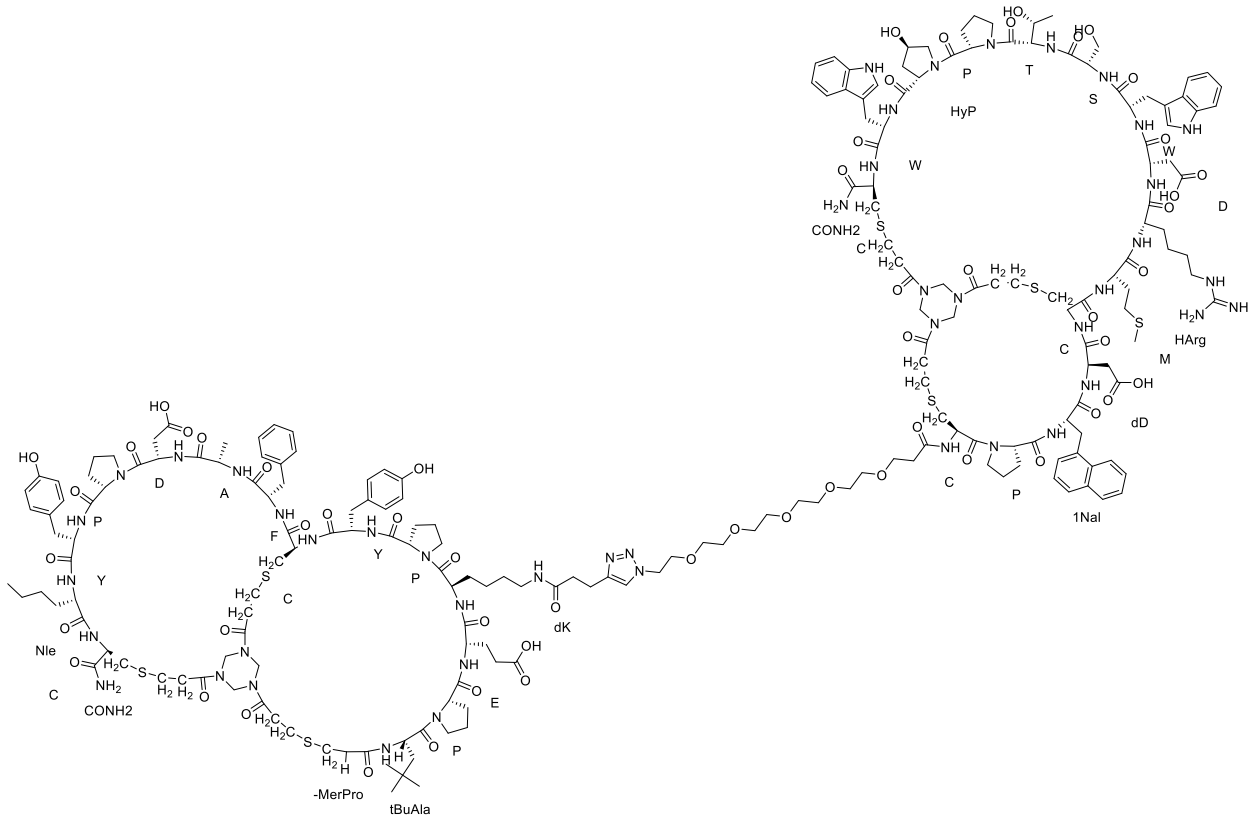

BCY12574

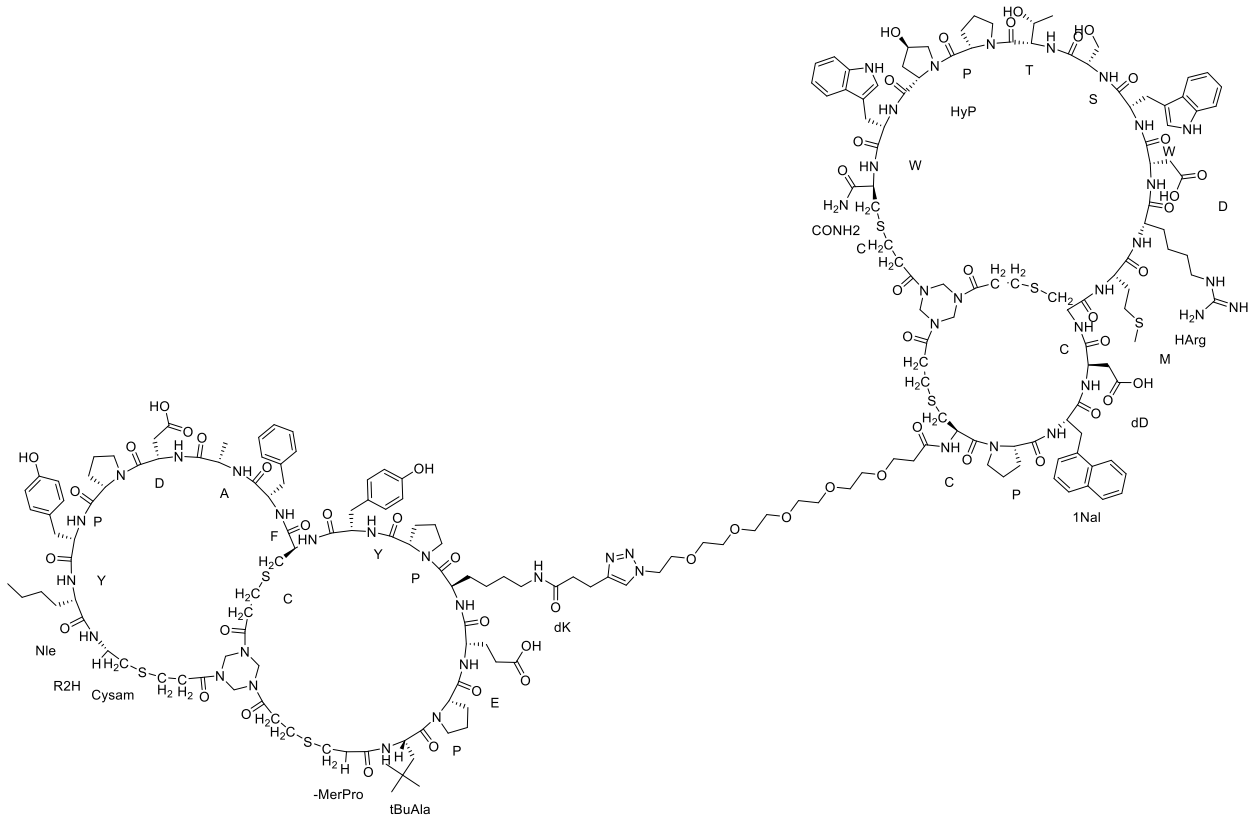

**BCY12576**

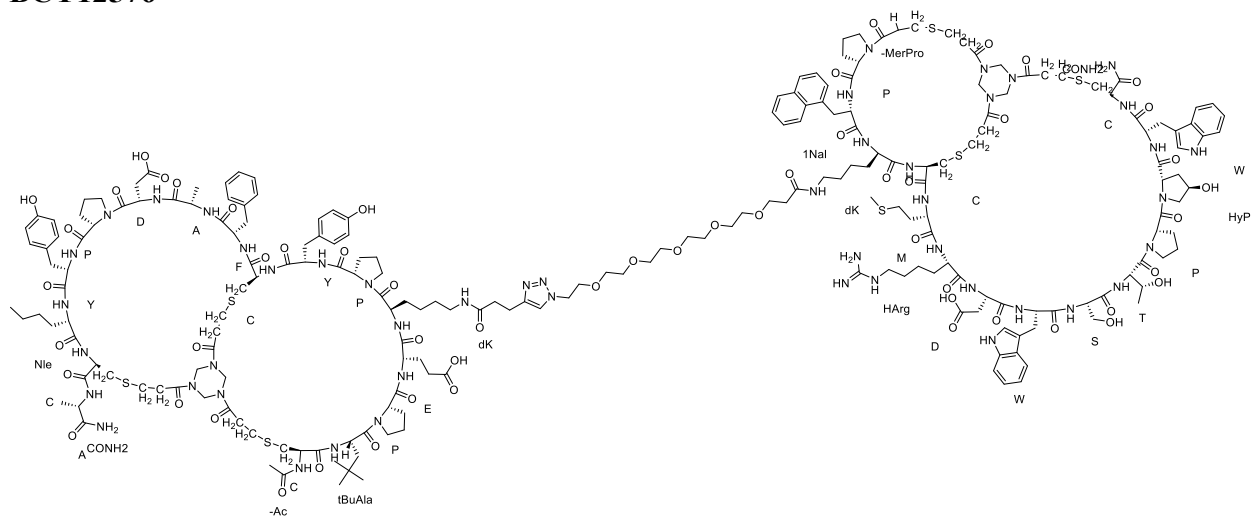

**BCY12579**

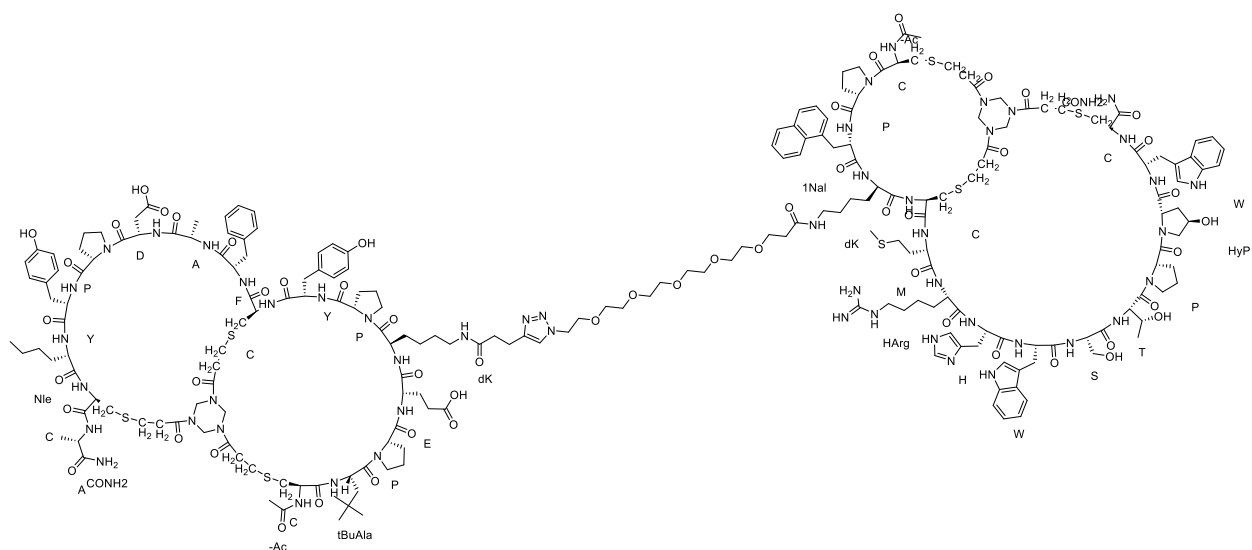

**BCY12580**

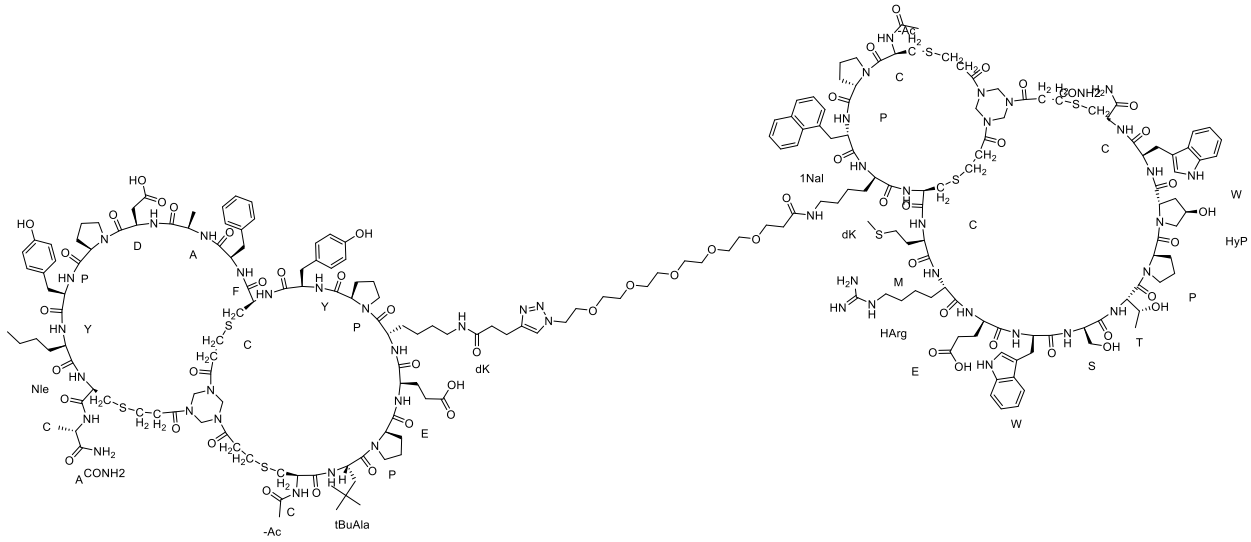

**BCY12581**

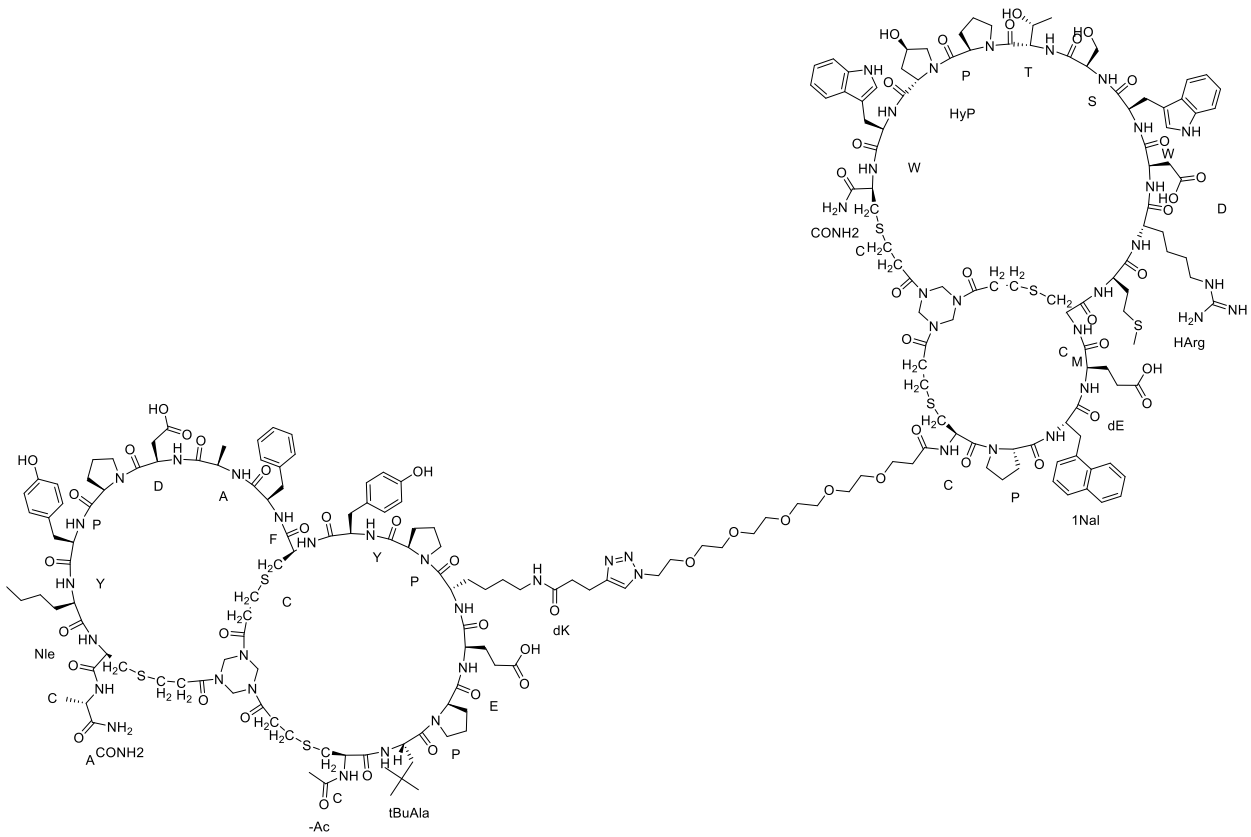



BCY12582

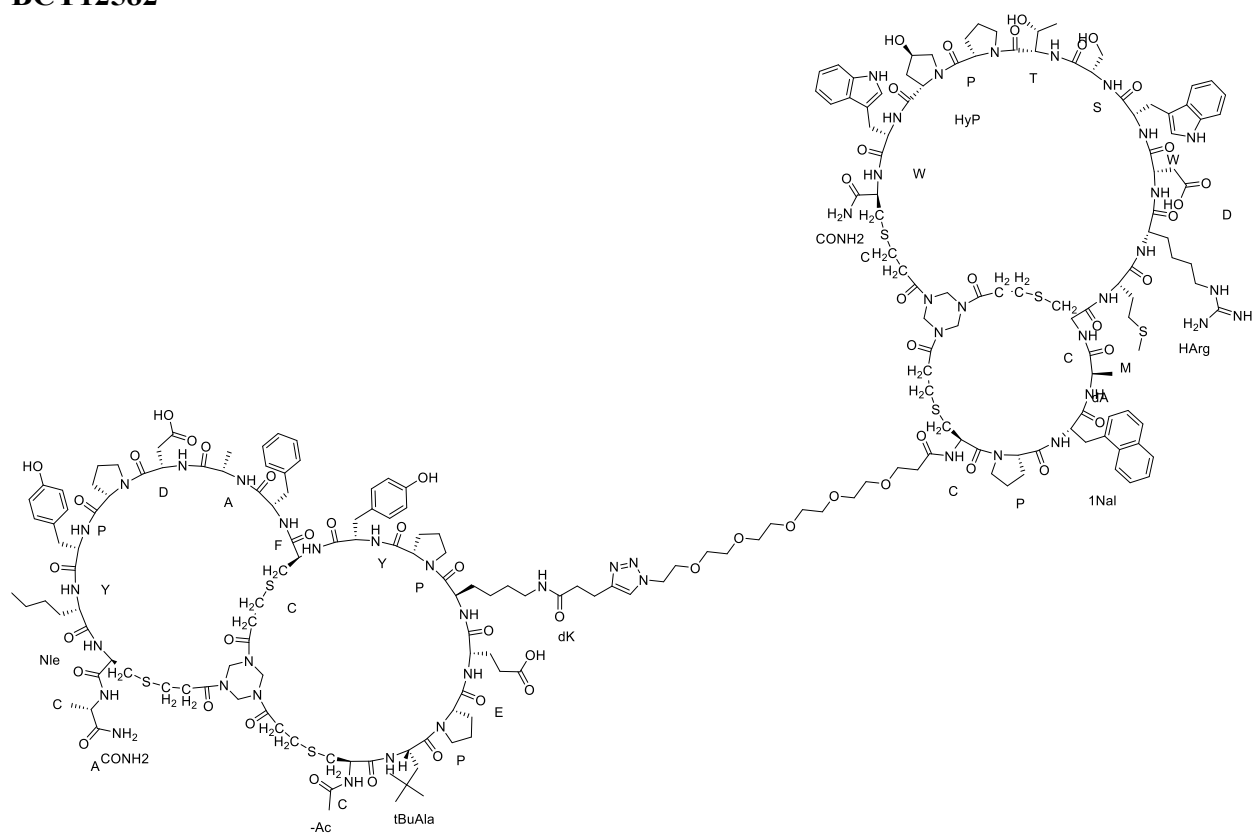

BCY12583

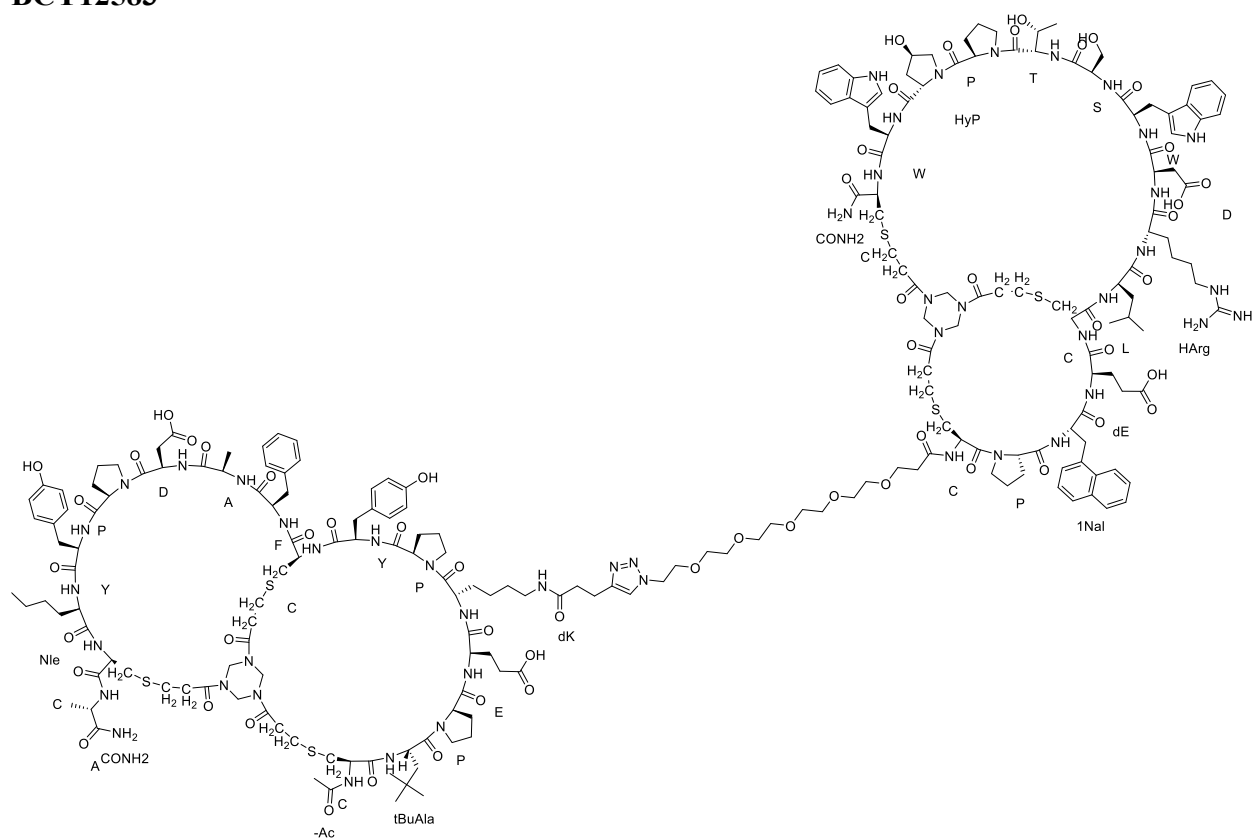

BCY12586

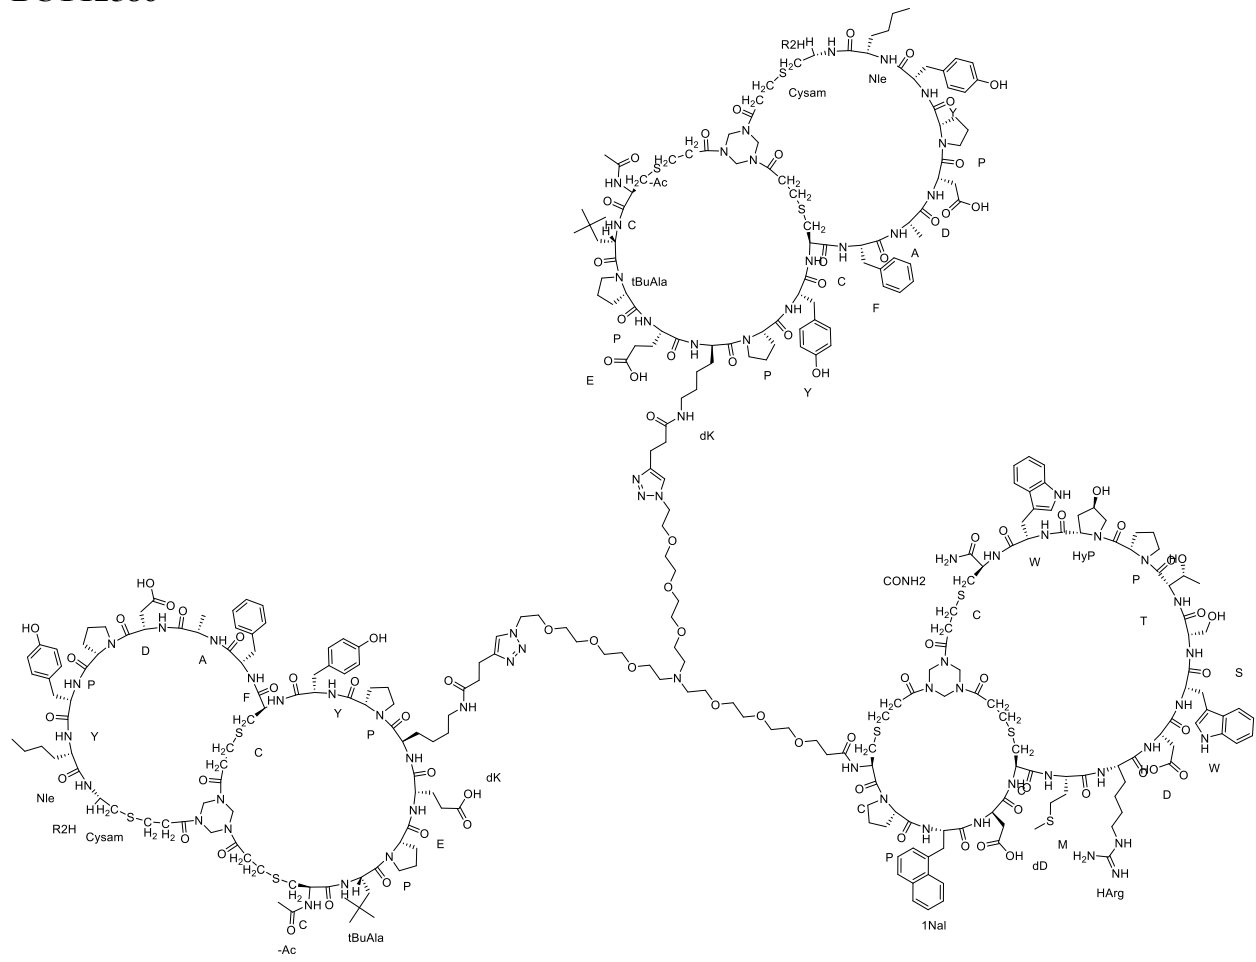

BCY13144

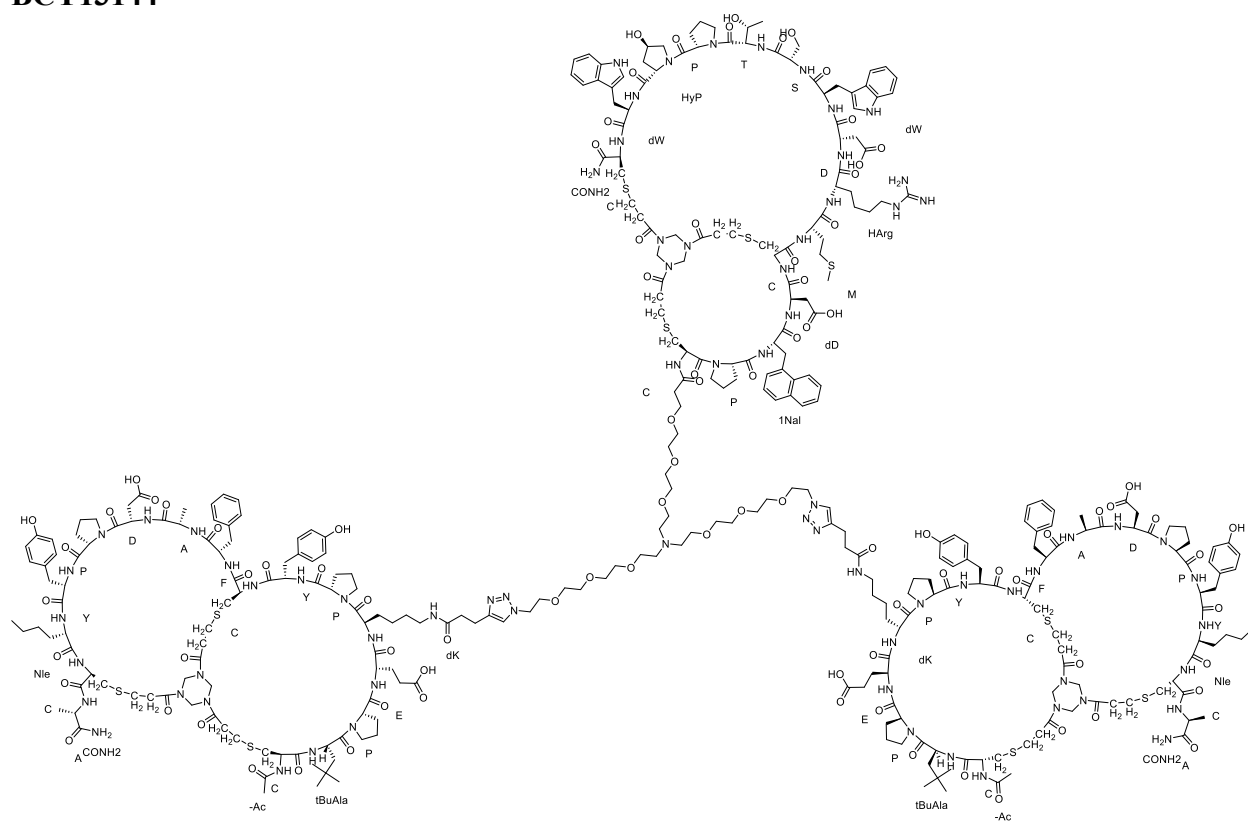

## References

1. V. Baeriswyl, H. Rapley, L. Pollaro, C. Stace, D. Teufel, E. Walker, S. Chen, G. Winter, J. Tite, C. Heinis, Bicyclic peptides with optimized ring size inhibit human plasma kallikrein and its orthologues while sparing paralogous proteases. *ChemMedChem* **7**, 1173-1176 (2012).
